# Supplementary material for: The synergistic effect of rigid and flexible substituents on insertion polymerization with α-diimine nickel and palladium catalysts
Source: Royal Society of Chemistry journal article supplement (doi:10.1039/d1py00812a), 2021-01-01
Supplement: d1py00812a1.pdf [file d1py00812a1.pdf]

Supporting Information for:

# **Synergistic Effect of Rigid and Flexible Substituents in Insertion Polymerization with $\alpha$ -Diimine Nickel and Palladium Catalysts**

Zijuan Hai<sup>a</sup>, Zhou Lu<sup>a</sup>, Shuaikang Li<sup>a</sup>, Zhong-Yan Cao<sup>\*b</sup>, Shengyu Dai<sup>\*a</sup>

<sup>a</sup>*Institutes of Physical Science and Information Technology, Key Laboratory of Structure and Functional Regulation of Hybrid Materials of Ministry of Education, Anhui University, Hefei, Anhui, 230601, China.*

<sup>b</sup>*College of Chemistry and Chemical Engineering, Henan University, Kaifeng 475004, China.*

## **1. Figures, Tables.**

## **2. Experimental Sections**

### **2.1 General Considerations**

### **2.2 Procedure for the Synthesis of Ligands L1-L4.**

### **2.3 Procedure for the Synthesis of Nickel Complexes Ni1-Ni4.**

### **2.4 Procedure for the Synthesis of Palladium Complexes Pd1-Pd4.**

### **2.5 A General Procedure for the Homopolymerization of Ethylene Using Ni Complexes.**

### **2.6 A General Procedure for the Homopolymerization of Ethylene Using Pd Complexes.**

### **2.7 A General Procedure for the Copolymerization of Polar Monomer with Ethylene Using Pd Complexes.**

## **3. Spectra Data**

### **3.1 <sup>1</sup>H and <sup>13</sup>C NMR of the Synthetic Compounds.**

### **3.2 HRMS and MALDI-TOF-MS Data.**

### **3.3 <sup>1</sup>H and <sup>13</sup>C NMR of Polymers.**

### **3.4 DSC, GPC of Polymers.**

## **4. References**

## **5. X-ray Crystallography**

## 1. Figures, Tables.

**Table S1. Mechanical properties.<sup>a</sup>**

| Ent. | Precat. | T/°C | Strain at break (%) | Stress at break (MPa) | SR (%) <sup>b</sup> | Young's modulus <sup>c</sup> |
|------|---------|------|---------------------|-----------------------|---------------------|------------------------------|
| 1    | Ni1     | 30   | 762                 | 4.7                   | 82                  | 0.62                         |
| 2    | Ni1     | 50   | 1153                | 2.6                   | 70                  | 0.23                         |
| 3    | Ni1     | 70   | 863                 | 1.8                   | 69                  | 0.21                         |
| 4    | Ni2     | 30   | 651                 | 8.5                   | 69                  | 1.31                         |
| 5    | Ni2     | 50   | 998                 | 10.3                  | 75                  | 1.03                         |
| 6    | Ni2     | 70   | 532                 | 2.1                   | 83                  | 0.39                         |
| 7    | Ni3     | 30   | 592                 | 5.9                   | 76                  | 1.00                         |
| 8    | Ni3     | 50   | 599                 | 2.2                   | 80                  | 0.37                         |
| 9    | Ni3     | 70   | 2062                | 0.3                   | 35                  | 0.01                         |
| 10   | Ni4     | 30   | 695                 | 4.9                   | 76                  | 0.71                         |
| 11   | Ni4     | 50   | 547                 | 1.0                   | 69                  | 0.18                         |
| 12   | Ni4     | 70   | 2385                | 0.2                   | 20                  | 0.01                         |
| 13   | Ni5     | 30   | 565                 | 13.1                  | 29                  | 2.32                         |

<sup>a</sup>Conditions: Samples from Table 1, entries 1-13 were performed at 10 mm/min by means of a Universal Test Machine (UTM2502) at room temperature. <sup>b</sup>The strain recovery values (SR) can be calculated by  $SR = 100(\epsilon_a - \epsilon_r)/\epsilon_a$ , where  $\epsilon_a$  is the applied strain and  $\epsilon_r$  is the strain in the cycle at zero load after 10th cycle.

<sup>c</sup>Young's modulus refers to the average modulus during tension.

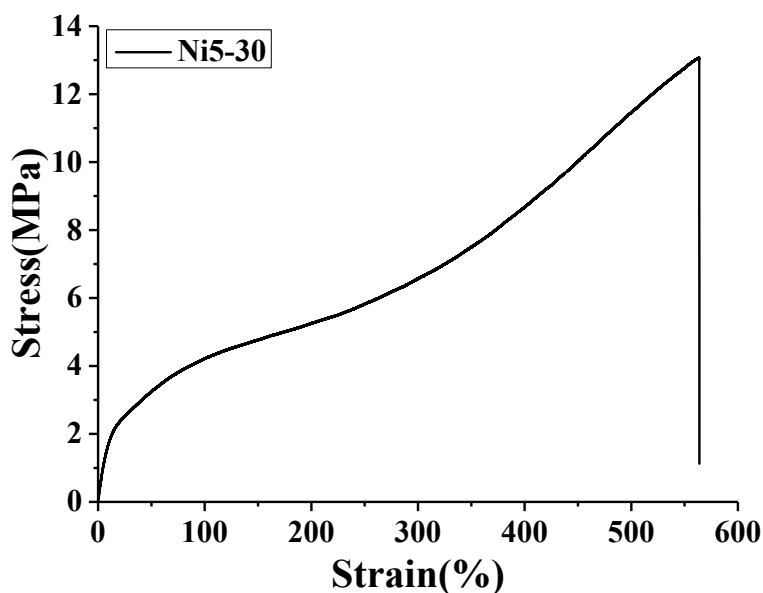

**Figure S1.** Stress-strain curves for polyethylene generated by Ni5 at 30 °C.

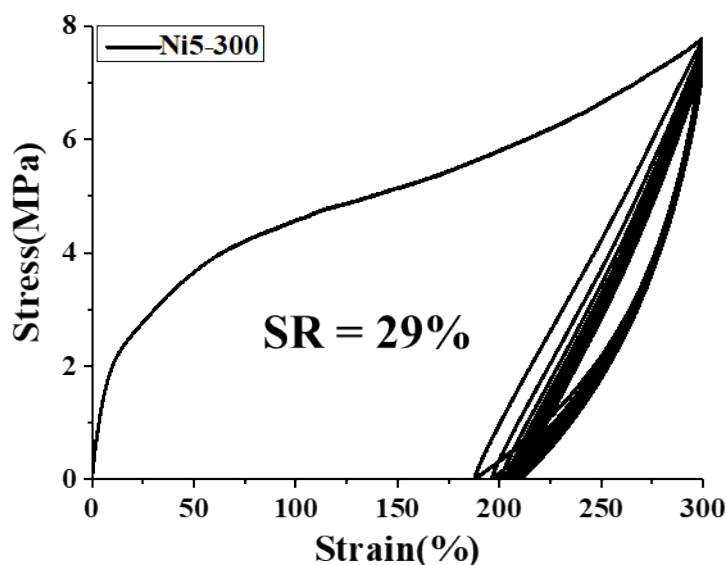

**Figure S2.** Plot of hysteresis experiment of ten cycles at a strain of 300% for sample generated by **Ni5** at 30 °C.

## 2. Experimental Sections

### 2.1 General Considerations

All chemicals were commercially sourced, except those whose synthesis is described. All experiments were carried out under a dry Nitrogen atmosphere using standard Schlenk techniques or in a glove-box. Deuterated solvents used for NMR were dried and distilled prior to use.  $^1\text{H}$ ,  $^{13}\text{C}$  NMR spectra were recorded by a JEOL JNM-ECZ600R 400 or 600 spectrometer at ambient temperature unless otherwise stated. The chemical shifts of the  $^1\text{H}$  and  $^{13}\text{C}$  NMR spectra were referenced to the residual solvent; Coupling constants are in Hz. Mass spectra were obtained using electro spray ionization (ESI) LCMS-2010A for **L1~L4**. Mass spectra of **Ni1~Ni4** and **Pd1~Pd4** were determined on a Atouflex Speed MALDI-TOF MS. Elemental analysis was performed by the Analytical Center of the Anhui University. X-ray Diffraction data were collected at 298(2) K on a Bruker Smart CCD area detector with graphite-monochromated Mo  $K\alpha$  radiation ( $\lambda = 0.71073 \text{ \AA}$ ). Molecular weight and molecular weight distribution of the polymers with low solubility at room temperature were determined by gel permeation chromatography (GPC) with a PL 210 equipped with one Shodex AT-803S and two Shodex AT-806MS columns at 150 °C using trichlorobenzene as a solvent and calibrated

with polystyrene standards. The molecular weight and the molecular weight distribution of the polymers with good solubility at room temperature were determined by gel permeation chromatography (GPC) equipped with two linear Styragel columns (HR2 and HR4) at 40°C using THF as a solvent and calibrated with polystyrene standards, and THF was employed as the eluent at a flow rate of 1.0 mL/min.

Stress/strain experiments were performed at 10 mm/min by means of a Universal Test Machine (UTM2502) at room temperature. At least three specimens of each polymer were tested. Polymers were melt-pressed at 50 °C above their melting point to obtain the test specimens. The test specimens have 14-mm gauge length, 2-mm width, and thickness of 0.5 mm. Differential scanning calorimetry (DSC). DSC was performed by a DSC Q2000 from TA Instruments. Samples were quickly heated to 150°C and kept for 5 min to remove thermal history, then cooled to -50°C at a rate of 10 K/min, and finally reheated to 150°C at the same rate under a nitrogen flow (50 mL/min). The maximum points endotherm (heating scan) were taken as the melting temperature ( $T_m$ ).

## 2.2 Procedure for the Synthesis of Ligands L1-L4.

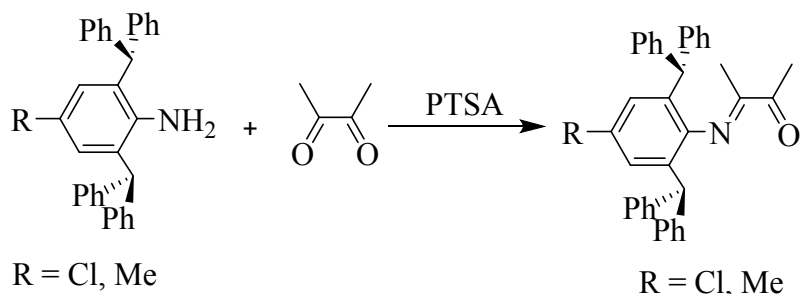

A solution of arylamine (10 mmol), 2, 3-butanedione (30 mmol) and *p*-toluenesulfonic acid (20 mg) in toluene (100 mL) was stirred at 80 °C for 24 h, until there was one main point on the TLC plate. The solvent was partially evaporated under reduced pressure until the formation of a light yellow solid. The remaining solution was diluted in methanol (100 mL). The yellow solid was isolated by filtration, dried by vacuum. The two compounds are known.<sup>1-2</sup>

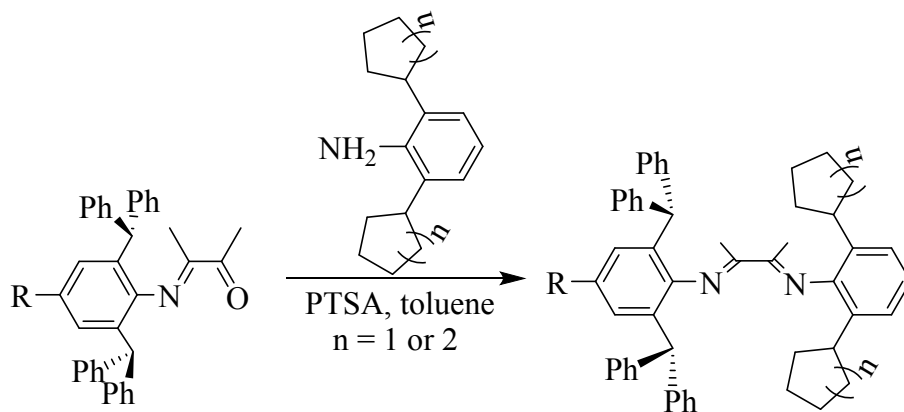

A mixture of  $\alpha$ -imino-ketones (2 mmol) and cycloalkyl arylamines (4.0 mmol) in toluene (40 mL) was stirred at 120 °C for 24 h. The solvent was evaporated under reduced pressure. The remaining mixture was diluted with methanol (100 mL). The resulting yellow solid was collected by filtration and recrystallized from  $\text{CH}_2\text{Cl}_2$  and hexanes to afford the desired product.

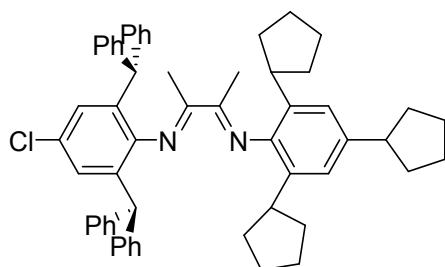

**L1** (1.26 g, 78%).  $^1\text{H}$  NMR (600 MHz,  $\text{CDCl}_3$ )  $\delta$  7.26 (dd,  $J = 12.9, 5.5$  Hz, 8H, Ar-*H*), 7.20 (d,  $J = 5.3$  Hz, 4H, Ar-*H*), 7.07 (d,  $J = 6.9$  Hz, 4H, Ar-*H*), 7.03 (d,  $J = 7.1$  Hz, 4H, Ar-*H*), 6.99 (s, 2H, Ar-*H*), 6.85 (s, 2H, Ar-*H*), 5.23 (s, 2H,  $\text{CHPh}_2$ ), 3.00 – 2.90 (m, 1H, *p*-Cp-*CH*), 2.69 (p,  $J = 7.8$  Hz, 2H, *o*-Cp-*CH*), 2.05 (s, 2H, Cp- $\text{CH}_2$ ), 1.98 (d,  $J = 5.0$  Hz, 2H, Cp- $\text{CH}_2$ ), 1.93 – 1.75 (m, 11H, Cp- $\text{CH}_2$ , N=C- $\text{CH}_3$ ), 1.74 – 1.50 (m, 12H, Cp- $\text{CH}_2$ ), 0.94 (s, 3H, N=C- $\text{CH}_3$ ).  $^{13}\text{C}$  NMR (151 MHz,  $\text{CDCl}_3$ )  $\delta$  170.74 (C=N), 168.04 (C=N), 146.57, 145.21, 142.89, 141.77, 141.55, 133.61, 132.90, 129.73, 129.38, 128.70, 128.39, 128.27, 126.79, 126.57, 122.26, 52.25 ( $\text{CHPh}_2$ ), 46.05 (*p*-Cp-*CH*), 40.08 (*o*-Cp-*CH*), 34.85 (Cp- $\text{CH}_2$ ), 34.49 (Cp- $\text{CH}_2$ ), 34.24 (Cp- $\text{CH}_2$ ), 26.29 (Cp- $\text{CH}_2$ ), 26.17 (Cp- $\text{CH}_2$ ), 25.57 (Cp- $\text{CH}_2$ ), 16.97 (N=C- $\text{CH}_3$ ), 16.35 (N=C- $\text{CH}_3$ ). HRMS ( $m/z$ ): calcd for  $\text{C}_{57}\text{H}_{60}\text{ClN}_2$ : 807.4440, found: 807.4435 [ $\text{M}+\text{H}$ ] $^+$ .

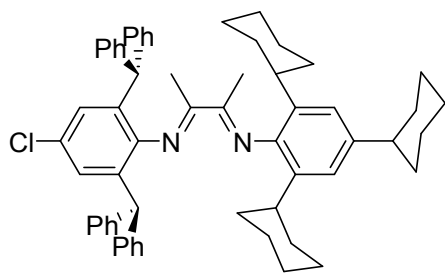

**L2** (1.41 g, 83%).  $^1\text{H}$  NMR (400 MHz,  $\text{CDCl}_3$ )  $\delta$  7.35 – 7.18 (m, 12H, Ar-*H*), 7.13 (d,  $J = 8.0$  Hz, 4H, Ar-*H*), 7.07 (d,  $J = 7.9$  Hz, 4H, Ar-*H*), 6.96 (s, 2H, Ar-*H*), 6.90 (s, 2H, Ar-*H*), 5.28 (s, 2H,  $\text{CHPh}_2$ ), 2.49 (d,  $J = 8.1$  Hz, 1H, Cy-*CH*), 2.20 (t,  $J = 11.2$  Hz, 2H, Cy-*CH*), 1.89 (dd,  $J = 20.0, 7.2$  Hz, 8H, Cy- $\text{CH}_2$ ), 1.72 (q,  $J = 13.4$  Hz, 9H, Cy- $\text{CH}_2$ , N=C- $\text{CH}_3$ ), 1.56 – 1.20 (m, 19H, Cy- $\text{CH}_2$ , N=C- $\text{CH}_3$ ).  $^{13}\text{C}$  NMR (101 MHz,  $\text{CDCl}_3$ )  $\delta$  170.68 (C=N), 167.72 (C=N), 146.52, 143.81, 143.23, 142.98, 141.98, 133.86, 133.46, 129.76, 129.37, 128.80, 128.75, 128.40, 128.37, 126.82, 126.58, 122.15, 52.17 ( $\text{CHPh}_2$ ), 44.58 (*p*-Cy-*CH*), 39.26 (*o*-Cy-*CH*), 34.86 (Cy- $\text{CH}_2$ ), 33.70 (Cy- $\text{CH}_2$ ), 33.55 (Cy- $\text{CH}_2$ ), 28.16 (Cy- $\text{CH}_2$ ), 27.52 (Cy- $\text{CH}_2$ ), 27.21 (Cy- $\text{CH}_2$ ), 27.18 (Cy- $\text{CH}_2$ ), 26.37 (Cy- $\text{CH}_2$ ), 16.91 (N=C- $\text{CH}_3$ ), 16.72 (N=C- $\text{CH}_3$ ). HRMS ( $m/z$ ): calcd for  $\text{C}_{60}\text{H}_{66}\text{ClN}_2$ : 849.4909, found: 849.4903 [ $\text{M}+\text{H}$ ] $^+$ .

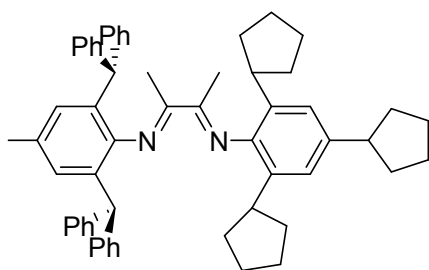

**L3** (1.27 g, 81%).  $^1\text{H}$  NMR (600 MHz,  $\text{CDCl}_3$ )  $\delta$  7.27 (t,  $J = 7.2$  Hz, 8H, Ar-*H*), 7.20 (dd,  $J = 11.2, 7.1$  Hz, 4H, Ar-*H*), 7.11 (d,  $J = 7.7$  Hz, 4H, Ar-*H*), 7.07 (d,  $J = 7.7$  Hz, 4H, Ar-*H*), 7.02 (s, 2H, Ar-*H*), 6.70 (s, 2H, Ar-*H*), 5.27 (s, 2H,  $\text{CHPh}_2$ ), 3.02 – 2.93 (m, 1H, *p*-Cp-*CH*), 2.74 (p,  $J = 8.4$  Hz, 2H, *o*-Cp-*CH*), 2.20 (s, 3H, Ar- $\text{CH}_3$ ), 2.09 (dd,  $J = 15.7, 11.5$  Hz, 2H, Cp- $\text{CH}_2$ ), 2.04 – 1.97 (m, 2H, Cp- $\text{CH}_2$ ), 1.97 – 1.89 (m, 2H, Cp- $\text{CH}_2$ ), 1.87 (s, 3H, N=C- $\text{CH}_3$ ) 1.87 – 1.78 (m, 6H, Cp- $\text{CH}_2$ ), 1.75 – 1.53 (m, 12H, Cp- $\text{CH}_2$ ), 0.98 (s, 3H, N=C- $\text{CH}_3$ ).  $^{13}\text{C}$  NMR (151 MHz,  $\text{CDCl}_3$ )  $\delta$  170.29 (C=N), 168.38 (C=N), 145.72, 145.41, 143.91, 142.71, 141.41, 132.98, 131.78, 131.42, 129.86, 129.52, 128.92, 128.51, 128.19, 126.45, 126.20, 122.24, 52.26 ( $\text{CHPh}_2$ ), 46.08 (*p*-Cp-*CH*), 40.11 (*o*-Cp-*CH*), 34.87 (Cp- $\text{CH}_2$ ), 34.51 (Cp- $\text{CH}_2$ ), 34.25 (Cp-

CH<sub>2</sub>), 26.31 (Cp-CH<sub>2</sub>), 26.20 (Cp-CH<sub>2</sub>), 25.60 (Cp-CH<sub>2</sub>), 21.43 (Ar-CH<sub>3</sub>), 17.04 (N=C-CH<sub>3</sub>), 16.20 (N=C-CH<sub>3</sub>). HRMS (m/z): calcd for C<sub>58</sub>H<sub>63</sub>N<sub>2</sub>: 787.4986, found: 787.4966 [M+H]<sup>+</sup>.

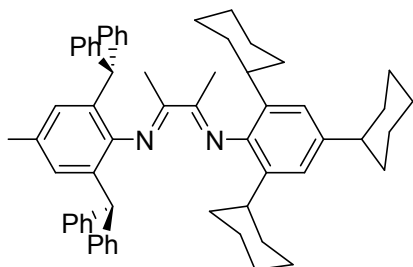

**L4** (1.23 g, 74%). <sup>1</sup>H NMR (400 MHz, CDCl<sub>3</sub>) δ 7.40 – 7.29 (m, 8H, Ar-*H*), 7.25 (dt, *J* = 8.7, 7.4 Hz, 8H, Ar-*H*), 7.17 (d, *J* = 7.4 Hz, 4H, Ar-*H*), 7.04 (s, 2H, Ar-*H*), 6.81 (s, 2H, Ar-*H*), 5.38 (s, 2H, CHPh<sub>2</sub>), 2.56 (dd, *J* = 11.0, 8.3 Hz, 1H, Cy-CH), 2.36 – 2.19 (m, 5H, Cy-CH<sub>2</sub>, Ar-CH<sub>3</sub>), 2.05 – 1.70 (m, 18H, Cy-CH<sub>2</sub>, N=C-CH<sub>3</sub>), 1.63 – 1.23 (m, 18H, Cy-CH<sub>2</sub>, N=C-CH<sub>3</sub>). <sup>13</sup>C NMR (101 MHz, CDCl<sub>3</sub>) δ 170.28 (C=N), 168.12 (C=N), 145.73, 144.08, 144.05, 143.14, 142.98, 133.99, 131.93, 131.31, 129.96, 129.57, 129.07, 128.60, 128.26, 126.53, 126.27, 122.18, 52.22 (CHPh<sub>2</sub>), 44.67 (*p*-Cy-CH), 39.31 (*o*-Cy-CH), 34.96 (Cy-CH<sub>2</sub>), 33.78 (Cy-CH<sub>2</sub>), 33.66 (Cy-CH<sub>2</sub>), 27.58 (Cy-CH<sub>2</sub>), 27.28 (Cy-CH<sub>2</sub>), 26.49 (Cy-CH<sub>2</sub>), 21.52 (Ar-CH<sub>3</sub>), 17.04 (N=C-CH<sub>3</sub>), 16.64 (N=C-CH<sub>3</sub>). HRMS (m/z): calcd for C<sub>61</sub>H<sub>69</sub>N<sub>2</sub>: 829.5455, found: 829.5453 [M+H]<sup>+</sup>.

### 2.3 Procedure for the Synthesis of Nickel Complexes Ni1-4:

The nickel complexes were prepared in a similar manner by the reaction of 0.2 mmol ligand with 1 equivalent (DME)NiBr<sub>2</sub> in dichloromethane. After stirring overnight, the solvent was removed, and the brown solid powder was washed with ether (10 mL × 2) and dried under vacuum to give the corresponding nickel complexes.

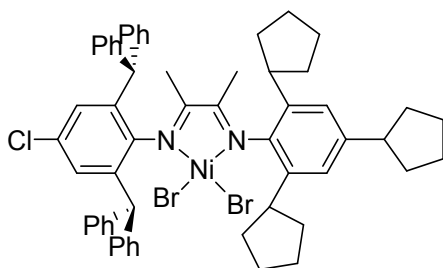

**Ni1:** (191 mg, 93%). Elemental analysis: calc. for  $C_{57}H_{59}Br_2ClN_2Ni$ : C, 66.72; H, 5.80; N, 2.73. Found: C, 66.38; H, 5.62; N, 2.57. MALDI-TOF-MS (m/z): calcd for  $C_{57}H_{59}BrClN_2Ni$ : 943.2898, found: 943.2863  $[M-Br]^+$ .

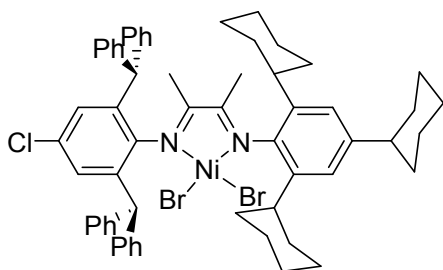

**Ni2:** (194 mg, 91%). Elemental analysis: calc. for  $C_{60}H_{65}Br_2ClN_2Ni$ : C, 67.47; H, 6.13; N, 2.62. Found: C, 67.30; H, 6.36; N, 2.51. MALDI-TOF-MS (m/z): calcd for  $C_{60}H_{65}BrClN_2Ni$ : 985.3368, found: 985.3348  $[M-Br]^+$ .

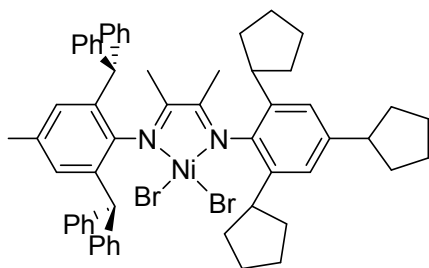

**Ni3:** (171 mg, 85%). Elemental analysis: calc. for  $C_{58}H_{62}Br_2N_2Ni$ : C, 69.27; H, 6.21; N, 2.79. Found: C, 69.46; H, 6.33; N, 2.86. MALDI-TOF-MS (m/z): calc. for  $C_{58}H_{62}BrN_2Ni$ : 923.3444, found: 923.3396  $[M-Br]^+$ .

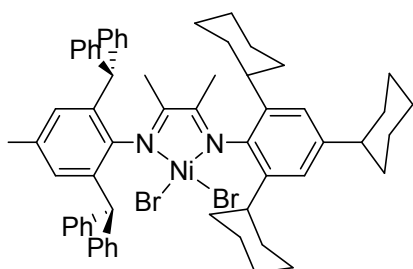

**Ni4:** (182 mg, 87%). Elemental analysis: calc. for  $C_{61}H_{68}Br_2N_2Ni$ : C, 69.93; H, 6.54; N, 2.67. Found: C, 69.78; H, 6.38; N, 2.81. MALDI-TOF-MS (m/z): calc. for  $C_{61}H_{68}BrN_2Ni$ : 965.3914, found: 965.3886  $[M-Br]^+$ .

#### 2.4 Procedure for the Synthesis of Palladium Complexes Pd1-4:



A mixture of the ligand (1 mmol), Pd(COD)MeCl (265 mg, 1 mmol) in CH<sub>2</sub>Cl<sub>2</sub> (20 mL) was stirred for 1 day at room temperature. During stirring, the color of the solution was deepening. At the end of the reaction, the solution was concentrated to 5 mL. The product was crashed out with 20 ml ether and washed with ether (3 × 5 mL). Then dried under reduced pressure at room temperature for about 5 h. The pure compound was obtained as an orange or red solid. Interconversion of two isomers in palladium complexes:

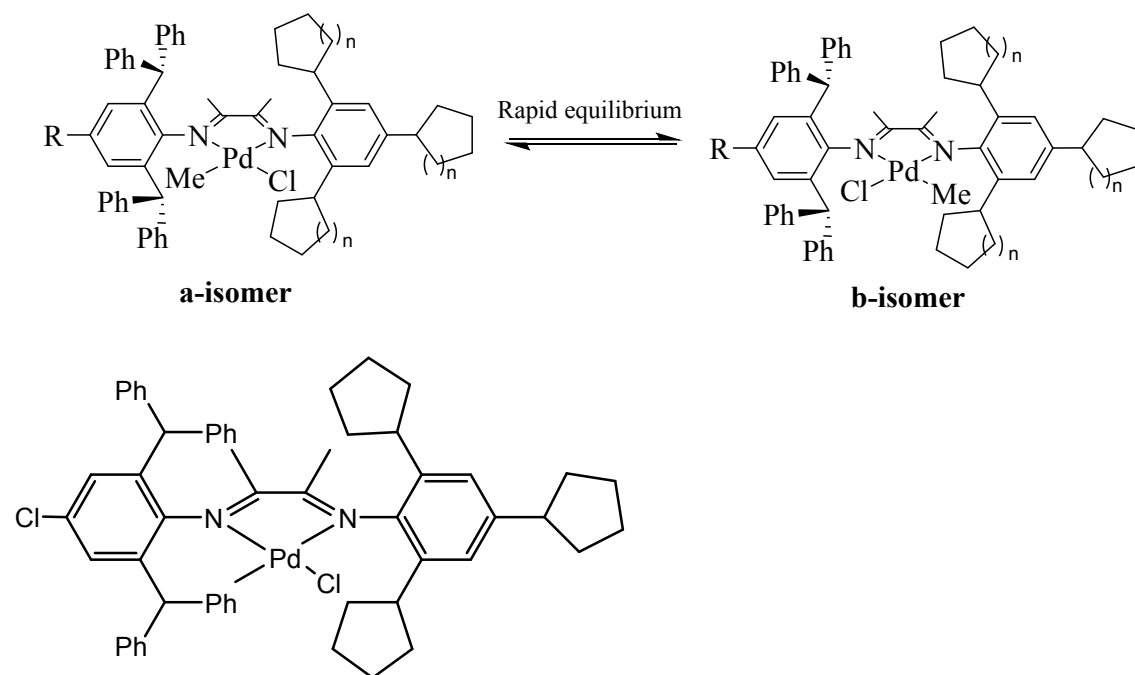

**Pd1:** (0.68 g, 71%). a-isomer: b-isomer = 12:1. <sup>1</sup>H NMR (600 MHz, CDCl<sub>3</sub>) δ 7.36 – 7.30 (m, 4H, Ar-H), 7.29 – 7.22 (m, 8H, Ar-H), 7.18 (dt, *J* = 24.5, 8.2 Hz, 8H, Ar-H), 7.10, 7.07 – 6.97 (s, m, 2H, Ar-H), 6.86 – 6.81 (m, 2H, Ar-H), 5.97, 5.94, 5.90 (s, 2H, CHPh<sub>2</sub>), 3.22 – 3.12, 2.50 – 2.41 (m, 3H, Cp-CH, Cp-CH<sub>2</sub>), 3.06 – 2.94 (m, 1H, Cp-CH), 2.09 (ddd, *J* = 10.2, 9.6, 4.0 Hz, 2H, Cp-CH<sub>2</sub>), 1.97 – 1.50 (m, 21H, Cp-CH<sub>2</sub>), 1.42, 1.40, 1.37 (s, 3H, N=C-CH<sub>3</sub>), 0.80, 0.72 (s, 3H, Pd-CH<sub>3</sub>), -0.30, -0.36 (d, *J* = 5.4 Hz, 3H, N=C-CH<sub>3</sub>). <sup>13</sup>C NMR (151 MHz, CDCl<sub>3</sub>) δ 175.13 (C=N), 173.83 (C=N), 170.79 (C=N), 145.88, 142.38, 142.07, 141.76, 141.29, 140.56, 137.03, 136.77, 131.61, 130.07, 129.78, 129.37, 129.11, 128.89, 128.70, 128.46, 128.38, 127.09, 126.72, 125.64, 123.14, 122.18, 118.11, 52.39 (CHPh<sub>2</sub>), 45.93 (*p*-Cp-CH), 41.12 (*p*-Cp-CH), 40.29 (*o*-Cp-CH), 40.13 (*o*-Cp-CH), 39.96 (*o*-Cp-CH), 38.10 (*o*-Cp-CH), 35.73 (Cp-CH<sub>2</sub>), 35.53 (Cp-CH<sub>2</sub>), 35.17 (Cp-CH<sub>2</sub>), 35.03 (Cp-CH<sub>2</sub>), 34.66 (Cp-CH<sub>2</sub>), 34.48 (Cp-CH<sub>2</sub>), 32.36 (Cp-CH<sub>2</sub>), 32.28 (Cp-CH<sub>2</sub>), 29.41 (Cp-CH<sub>2</sub>), 29.06 (Cp-CH<sub>2</sub>), 28.46 (Cp-CH<sub>2</sub>), 27.80 (Cp-

CH<sub>2</sub>), 27.68 (Cp-CH<sub>2</sub>), 26.61 (Cp-CH<sub>2</sub>), 26.52 (Cp-CH<sub>2</sub>), 26.35 (Cp-CH<sub>2</sub>), 26.15 (Cp-CH<sub>2</sub>), 25.57 (Cp-CH<sub>2</sub>), 25.24 (Cp-CH<sub>2</sub>), 20.10 (N=C-CH<sub>3</sub>), 19.94 (N=C-CH<sub>3</sub>), 18.68 (N=C-CH<sub>3</sub>), 4.70 (Pd-CH<sub>3</sub>), 4.51 (Pd-CH<sub>3</sub>). Anal. Calcd for (C<sub>58</sub>H<sub>62</sub>Cl<sub>2</sub>N<sub>2</sub>Pd): C, 72.23; H, 6.48; N, 2.90. Found: C, 72.12; H, 6.57; N, 2.76. MALDI-TOF-MS (m/z): calcd for C<sub>57</sub>H<sub>59</sub>ClN<sub>2</sub>Pd: 914.3406, found: 914.4093 [M-Me-Cl]<sup>+</sup>.

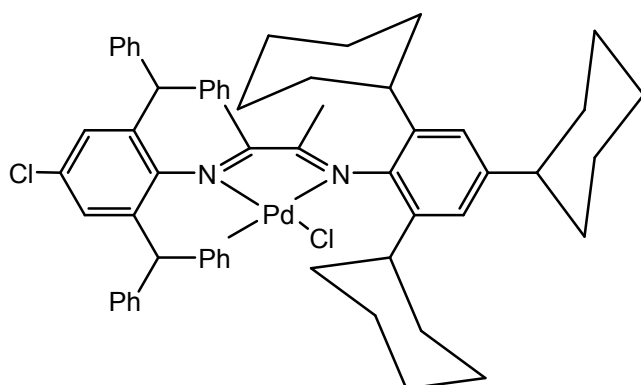

**Pd2:** (0.74 g, 74%). a-isomer: b-isomer = 8:1. <sup>1</sup>H NMR (600 MHz, CDCl<sub>3</sub>) δ 7.36 (d, *J* = 7.7 Hz, 4H, Ar-*H*), 7.30 – 7.22 (m, 12H, Ar-*H*), 7.21 – 7.15 (m, 4H, Ar-*H*), 7.08 (d, *J* = 2.1 Hz, 2H, Ar-*H*), 7.05, 6.89 (s, 2H, Ar-*H*), 5.91, 5.87 (s, 2H, CHPh<sub>2</sub>), 2.65 (ddd, *J* = 15.2, 11.2, 3.6 Hz, 2H, Cy-CH), 2.49 (tt, *J* = 13.9, 7.0 Hz, 1H, Cy-CH), 2.24 (d, *J* = 12.6 Hz, 2H, Cy-CH<sub>2</sub>), 2.02 – 1.58 (m, 14H, Cy-CH<sub>2</sub>), 1.48 – 1.20 (m, 17H, Cy-CH<sub>2</sub>, N=C-CH<sub>3</sub>), 0.89, 0.73 (s, 3H, Pd-CH<sub>3</sub>), -0.26, -0.33 (s, 3H, N=C-CH<sub>3</sub>). <sup>13</sup>C NMR (151 MHz, CDCl<sub>3</sub>) δ 175.02 (C=N), 173.70 (C=N), 147.05, 143.41, 142.31, 141.78, 141.70, 141.45, 140.24, 139.57, 138.09, 137.14, 136.97, 133.16, 131.67, 130.71, 130.17, 130.01, 129.68, 129.32, 129.04, 128.83, 128.75, 128.46, 128.39, 127.37, 127.08, 126.70, 125.27, 123.62, 52.24 (CHPh<sub>2</sub>), 44.45 (*p*-Cy-CH), 39.53 (*o*-Cy-CH), 38.95 (*o*-Cy-CH), 34.55 (Cy-CH<sub>2</sub>), 34.39 (Cy-CH<sub>2</sub>), 33.89 (Cy-CH<sub>2</sub>), 27.07 (Cy-CH<sub>2</sub>), 26.97 (Cy-CH<sub>2</sub>), 26.82 (Cy-CH<sub>2</sub>), 26.23 (Cy-CH<sub>2</sub>), 25.97 (Cy-CH<sub>2</sub>), 20.09 (N=C-CH<sub>3</sub>), 18.44 (N=C-CH<sub>3</sub>), 5.12 (Pd-CH<sub>3</sub>). Anal. Calcd for (C<sub>61</sub>H<sub>68</sub>Cl<sub>2</sub>N<sub>2</sub>Pd): C, 72.79; H, 6.81; N, 2.78. Found: C, 72.87; H, 6.64; N, 2.64. MALDI-TOF-MS (m/z): calcd for C<sub>60</sub>H<sub>65</sub>ClN<sub>2</sub>Pd: 954.3871, found: 954.3022 [M-Me-Cl]<sup>+</sup>.

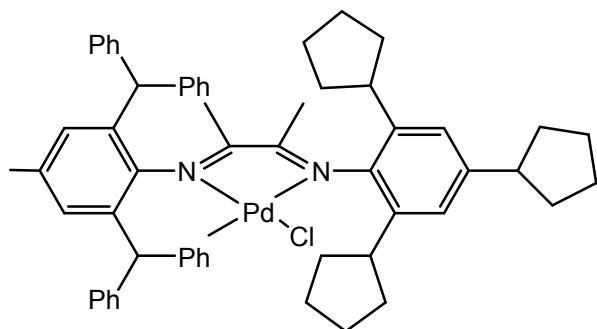

**Pd3:** (0.72 g, 76%). a-isomer: b-isomer = 6:1.  $^1\text{H}$  NMR (600 MHz,  $\text{CDCl}_3$ ) 7.35 (t,  $J = 7.7$  Hz, 4H, Ar-*H*), 7.30 – 7.20 (m, 8H, Ar-*H*), 7.20 – 7.12 (m, 8H, Ar-*H*), 7.09, 7.07, 7.05 (s, 2H, Ar-*H*), 6.83, 6.66 (s, 2H, Ar-*H*), 5.96, 5.93, 5.88 (s, 2H, *CHPh*<sub>2</sub>), 3.23 – 3.15, 2.52 – 2.40 (m, 3H, Cp-*CH*, Cp-*CH*<sub>2</sub>), 3.02 – 2.92, 2.68 – 2.60 (m, 1H, Cp-*CH*), 2.12, 2.16 (s, 3H, Ar-*CH*<sub>3</sub>), 2.13 – 2.06 (m, 2H, Cp-*CH*<sub>2</sub>), 1.97 – 1.53 (m, 21H, Cp-*CH*<sub>2</sub>), 1.42, 1.40, 1.39 (s, 3H, N=C-*CH*<sub>3</sub>), 0.97, 0.76, 0.69 (s, 3H, Pd-*CH*<sub>3</sub>), -0.29, -0.35 (s, 3H, N=C-*CH*<sub>3</sub>).  $^{13}\text{C}$  NMR (151 MHz,  $\text{CDCl}_3$ )  $\delta$  175.26 (C=N), 173.45 (C=N), 145.70, 143.33, 142.43, 142.14, 141.54, 141.25, 140.68, 136.86, 135.61, 135.30, 135.18, 134.67, 130.16, 130.08, 129.90, 129.51, 129.38, 129.10, 128.90, 128.69, 128.42, 128.20, 127.04, 126.75, 126.26, 123.07, 122.51, 52.41 (*CHPh*<sub>2</sub>), 52.23 (*CHPh*<sub>2</sub>), 45.94 (*p*-Cp-*CH*), 41.07 (*p*-Cp-*CH*), 40.25 (*o*-Cp-*CH*), 40.14 (*o*-Cp-*CH*), 39.93 (*o*-Cp-*CH*), 35.72 (Cp-*CH*<sub>2</sub>), 35.58 (Cp-*CH*<sub>2</sub>), 35.14 (Cp-*CH*<sub>2</sub>), 35.01 (Cp-*CH*<sub>2</sub>), 34.85 (Cp-*CH*<sub>2</sub>), 34.66 (Cp-*CH*<sub>2</sub>), 34.47 (Cp-*CH*<sub>2</sub>), 32.38 (Cp-*CH*<sub>2</sub>), 32.29 (Cp-*CH*<sub>2</sub>), 27.80 (Cp-*CH*<sub>2</sub>), 27.68 (Cp-*CH*<sub>2</sub>), 26.61 (Cp-*CH*<sub>2</sub>), 26.36 (Cp-*CH*<sub>2</sub>), 26.23 (Cp-*CH*<sub>2</sub>), 26.15 (Cp-*CH*<sub>2</sub>), 25.57 (Cp-*CH*<sub>2</sub>), 25.25 (Cp-*CH*<sub>2</sub>), 21.60 (Ar-*CH*<sub>3</sub>), 20.10 (N=C-*CH*<sub>3</sub>), 19.94 (N=C-*CH*<sub>3</sub>), 19.74 (N=C-*CH*<sub>3</sub>), 18.76 (N=C-*CH*<sub>3</sub>), 18.53 (N=C-*CH*<sub>3</sub>), 4.14 (Pd-*CH*<sub>3</sub>), 3.96 (Pd-*CH*<sub>3</sub>). Anal. Calcd for ( $\text{C}_{59}\text{H}_{65}\text{ClN}_2\text{Pd}$ ): C, 75.06; H, 6.94; N, 2.97. Found: C, 75.21; H, 6.78; N, 2.79. MALDI-TOF-MS ( $m/z$ ): calcd for  $\text{C}_{58}\text{H}_{62}\text{N}_2\text{Pd}$ : 892.3948, found: 892.2830 [ $\text{M-Me-Cl}$ ]<sup>+</sup>.

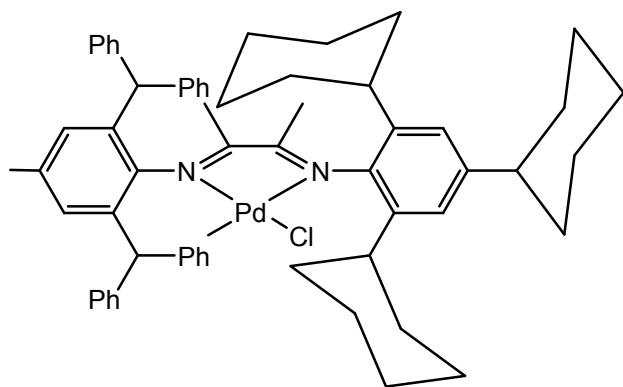

**Pd4:** (0.67 g, 68%). a-isomer: b-isomer = 3:1.  $^1\text{H}$  NMR (600 MHz,  $\text{CDCl}_3$ )  $\delta$  7.38, 7.33 (d,  $J = 7.7$  Hz, 4H, Ar-*H*), 7.30 – 7.13 (m, 16H, Ar-*H*), 7.08, 7.04 (s, 2H, Ar-*H*), 6.88, 6.71 (s, 2H, Ar-*H*), 5.91, 5.87 (s, 2H,  $\text{CHPh}_2$ ), 2.68 (dd,  $J = 11.3, 8.0$  Hz, 2H, Cy-*CH*), 2.50 (dd,  $J = 11.2, 8.2$  Hz, 1H, Cy-*CH*), 2.30 – 2.23 (m, 2H, Cy- $\text{CH}_2$ ), 2.23, 2.17 (s, 3H, Ar- $\text{CH}_3$ ), 2.03 – 1.55 (m, 14H, Cy- $\text{CH}_2$ ), 1.53 – 1.20 (m, 17H, Cy- $\text{CH}_2$ , N=C- $\text{CH}_3$ ), 0.91, 0.70 (s, 3H, Pd- $\text{CH}_3$ ), -0.23, -0.31 (s, 3H, N=C- $\text{CH}_3$ ).  $^{13}\text{C}$  NMR (151 MHz,  $\text{CDCl}_3$ )  $\delta$  178.19 (C=N), 175.15 (C=N), 173.33 (C=N), 170.42 (C=N), 146.89, 144.35, 143.28, 142.98, 142.37, 142.28, 141.86, 141.78, 141.13, 140.99, 139.95, 139.69, 137.83, 137.22, 136.95, 136.68, 136.46, 136.31, 136.03, 135.22, 135.16, 135.10, 134.60, 130.78, 130.25, 130.10, 129.80, 129.46, 129.22, 129.05, 128.83, 128.64, 128.46, 128.21, 127.78, 127.03, 126.74, 126.24, 125.38, 123.54, 123.08, 122.92, 52.24 ( $\text{CHPh}_2$ ), 52.13 ( $\text{CHPh}_2$ ), 44.45 (*p*-Cy-*CH*), 44.27 (*p*-Cy-*CH*), 39.47 (*o*-Cy-*CH*), 38.91 (*o*-Cy-*CH*), 34.57 (Cy- $\text{CH}_2$ ), 34.41 (Cy- $\text{CH}_2$ ), 34.02 (Cy- $\text{CH}_2$ ), 33.89 (Cy- $\text{CH}_2$ ), 27.23 (Cy- $\text{CH}_2$ ), 27.08 (Cy- $\text{CH}_2$ ), 26.98 (Cy- $\text{CH}_2$ ), 26.82 (Cy- $\text{CH}_2$ ), 26.36 (Cy- $\text{CH}_2$ ), 26.24 (Cy- $\text{CH}_2$ ), 26.20 (Cy- $\text{CH}_2$ ), 26.01 (Cy- $\text{CH}_2$ ), 21.65 (Ar- $\text{CH}_3$ ), 21.61 (Ar- $\text{CH}_3$ ), 20.10 (N=C- $\text{CH}_3$ ), 19.45 (N=C- $\text{CH}_3$ ), 18.69 (N=C- $\text{CH}_3$ ), 18.32 (N=C- $\text{CH}_3$ ), 4.60 (Pd- $\text{CH}_3$ ), 4.51 (Pd- $\text{CH}_3$ ). Anal. Calcd for ( $\text{C}_{62}\text{H}_{71}\text{ClN}_2\text{Pd}$ ): C, 75.52; H, 7.26; N, 2.84. Found: C, 75.81; H, 7.54; N, 2.71. MALDI-TOF-MS ( $m/z$ ): calcd for  $\text{C}_{61}\text{H}_{68}\text{N}_2\text{Pd}$ : 934.4417, found: 934.3491 [ $\text{M-Me-Cl}$ ] $^+$ .

## 2.5 A General Procedure for the Homopolymerization of Ethylene Using Ni Complexes.

In a typical experiment, a 350 mL thick wall pressure glass reactor connected with a high pressure gas line was firstly dried at 90 °C under vacuum for at least 1 h. The reactor was then adjusted to the desired polymerization temperature. 40 mL of toluene and the desired amount MAO was added to the reactor under  $\text{N}_2$  atmosphere, then the desired amount of catalyst in 1 mL of  $\text{CH}_2\text{Cl}_2$  was injected into the polymerization system via syringe. With a rapid stirring,

the reactor was pressurized and maintained at 6 atm of ethylene. After 10 min, the pressure reactor was vented and the polymer was precipitated in ethanol, filtered and dried at 50 °C for at least 24 h under vacuum.

### **2.6 A General Procedure for the Homopolymerization of Ethylene Using Pd Complexes.**

In a typical experiment, a 350 mL thick wall pressure glass reactor connected with a high pressure gas line was firstly dried at 90 °C under vacuum for at least 1 h. The reactor was then adjusted to the desired polymerization temperature. 40 mL of toluene and the desired amount NaBARF was added to the reactor under N<sub>2</sub> atmosphere, then the desired amount of catalyst in 1 mL of CH<sub>2</sub>Cl<sub>2</sub> was injected into the polymerization system via syringe. With a rapid stirring, the reactor was pressurized and maintained at 6 atm of ethylene. After the desired time, the pressure reactor was vented and the polymer was dried under vacuum overnight.

### **2.7 A General Procedure for the Copolymerization of Polar Monomer with Ethylene using Pd Complexes.**

In a typical experiment, a 350 mL thick wall pressure glass reactor connected with a high pressure gas line was firstly dried at 90 °C under vacuum for at least 1 h. The reactor was then adjusted to the desired polymerization temperature. 18 mL of DCM with the desired amount NaBARF was added to the reactor under N<sub>2</sub> atmosphere, then the desired amount of polar monomer and the desired amount of Pd catalyst in 2 mL of CH<sub>2</sub>Cl<sub>2</sub> was injected into the polymerization system via syringe subsequently. With a rapid stirring, the reactor was pressurized and maintained at the desired pressure of ethylene. After 12 h, the pressure reactor was vented and the copolymer was dried under vacuum overnight.

## **3. Spectra Data**

### **3.1 <sup>1</sup>H and <sup>13</sup>C NMR of the Synthetic Compounds.**

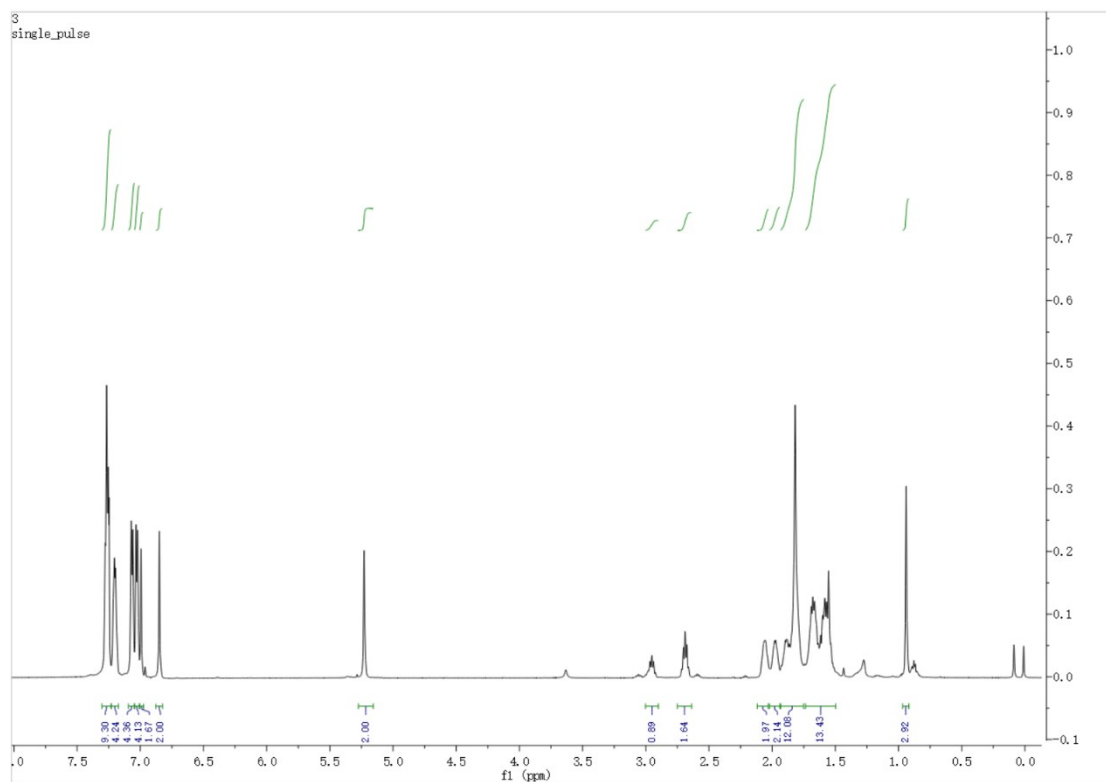

**Figure S3.**  $^1\text{H}$  NMR spectrum of **L1** in  $\text{CDCl}_3$ .

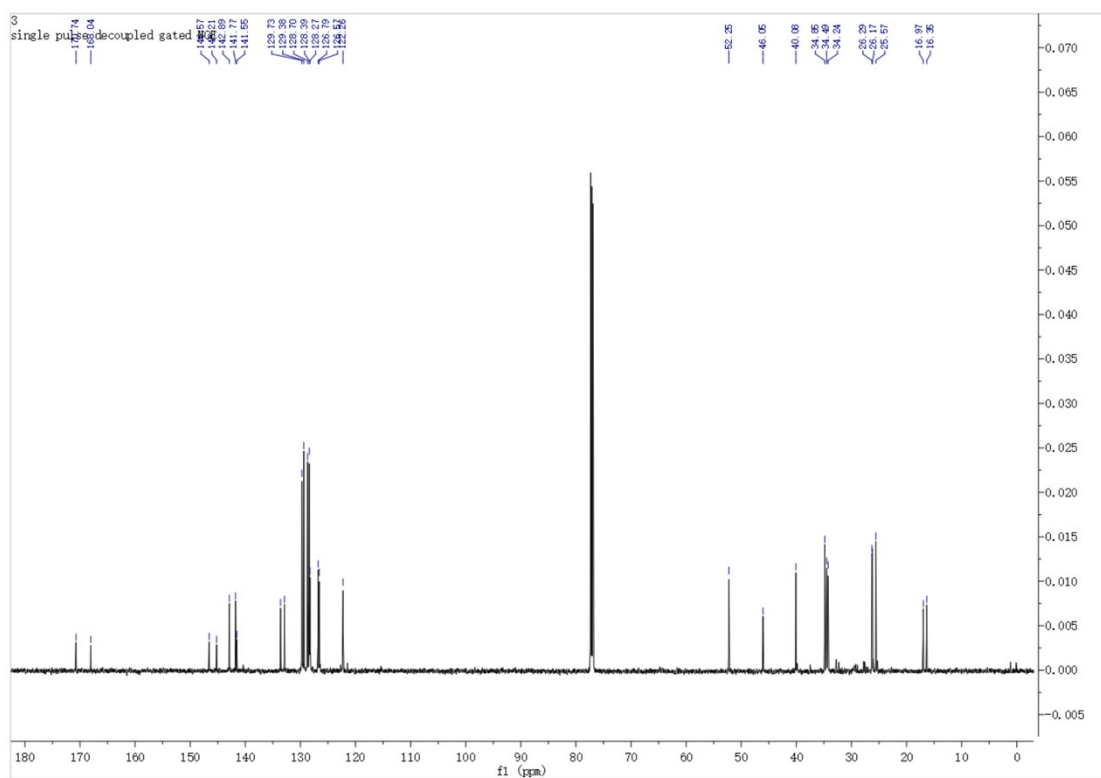

**Figure S4.**  $^{13}\text{C}$  NMR spectrum of **L1** in  $\text{CDCl}_3$ .

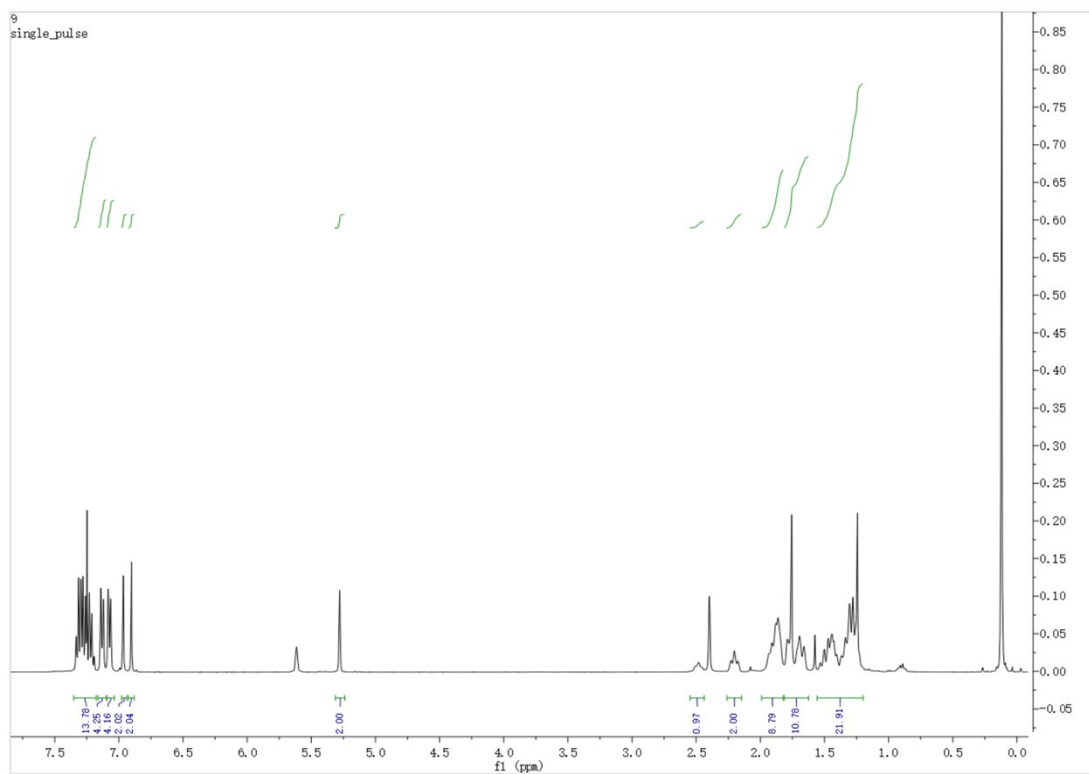

Figure S5.  $^1\text{H}$  NMR spectrum of L2 in  $\text{CDCl}_3$ .

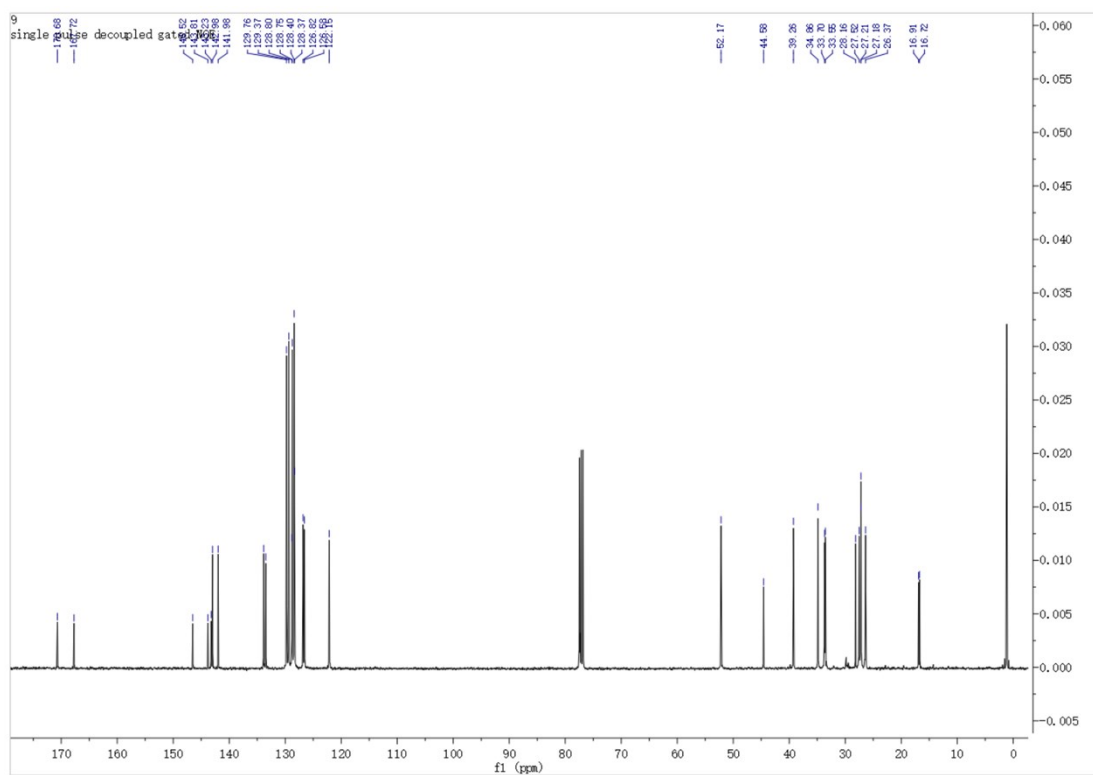

Figure S6.  $^{13}\text{C}$  NMR spectrum of L2 in  $\text{CDCl}_3$ .

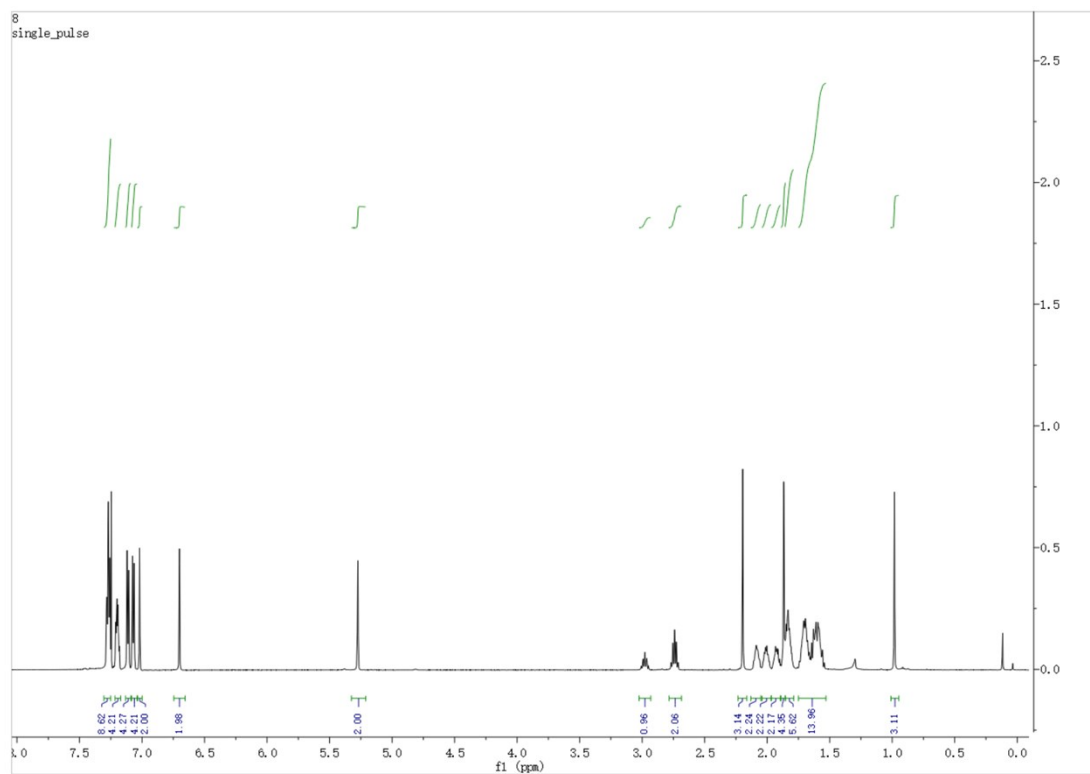

**Figure S7.**  $^1\text{H}$  NMR spectrum of **L3** in  $\text{CDCl}_3$ .

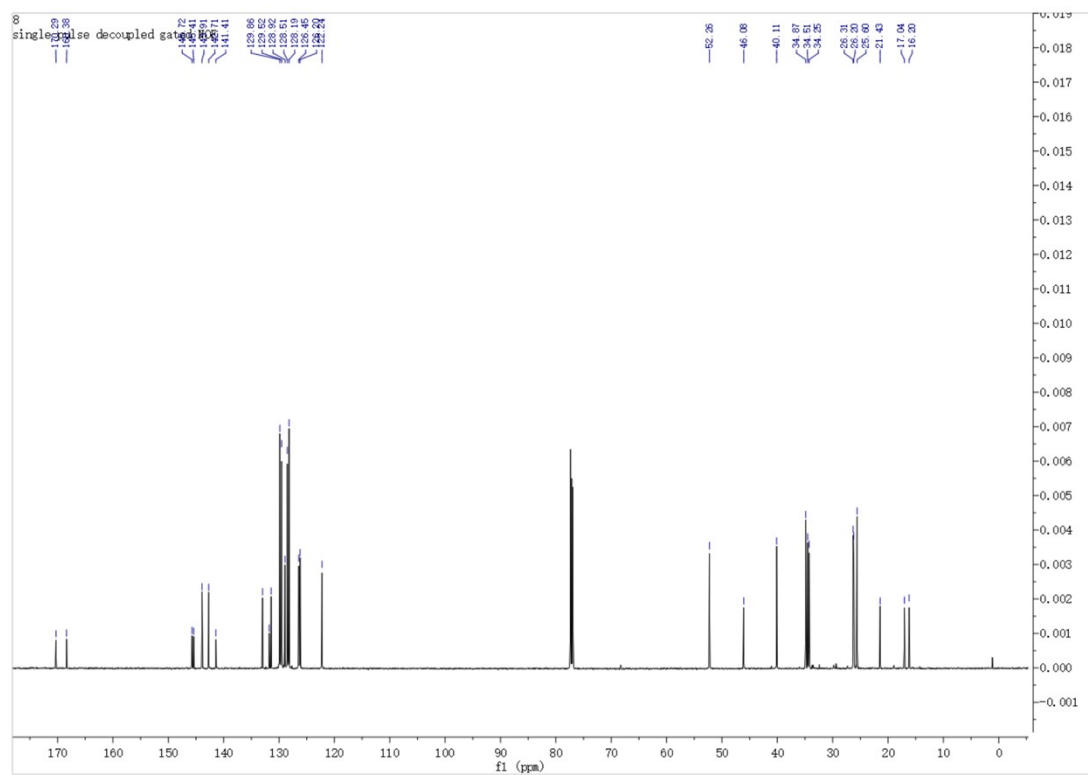

**Figure S8.**  $^{13}\text{C}$  NMR spectrum of **L3** in  $\text{CDCl}_3$ .



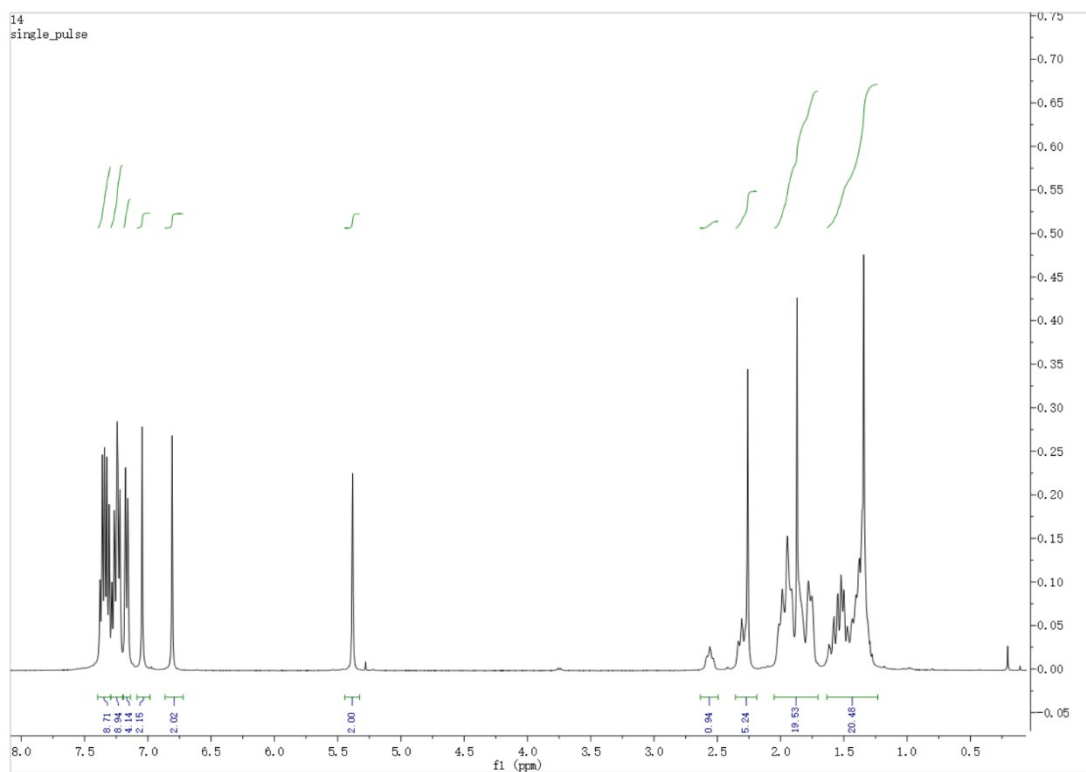

**Figure S9.**  $^1\text{H}$  NMR spectrum of **L4** in  $\text{CDCl}_3$ .

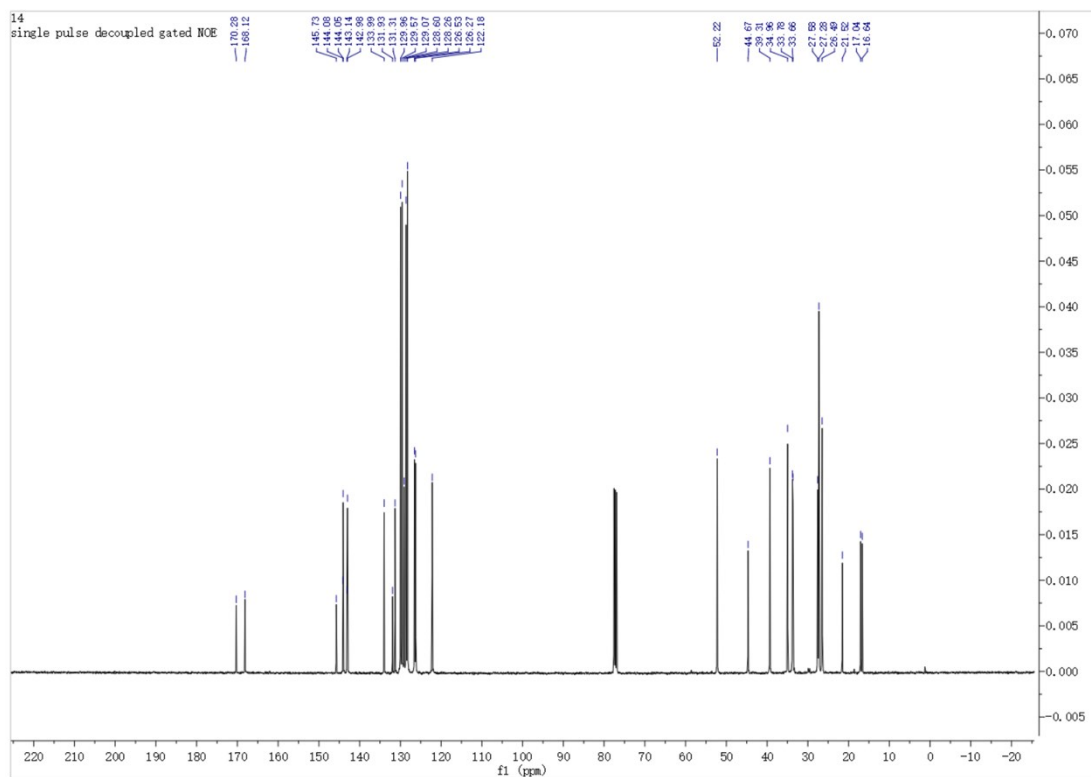

**Figure S10.**  $^{13}\text{C}$  NMR spectrum of **L4** in  $\text{CDCl}_3$ .

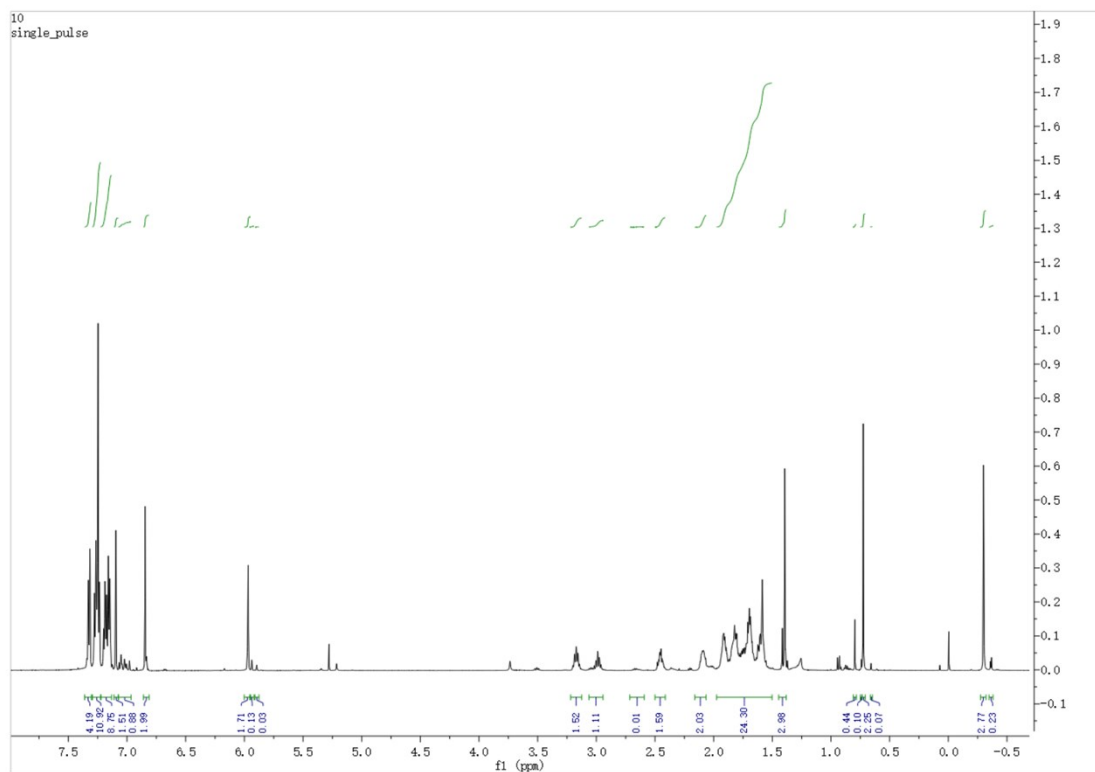

Figure S11.  $^1\text{H}$  NMR spectrum of Pd1 in  $\text{CDCl}_3$ .

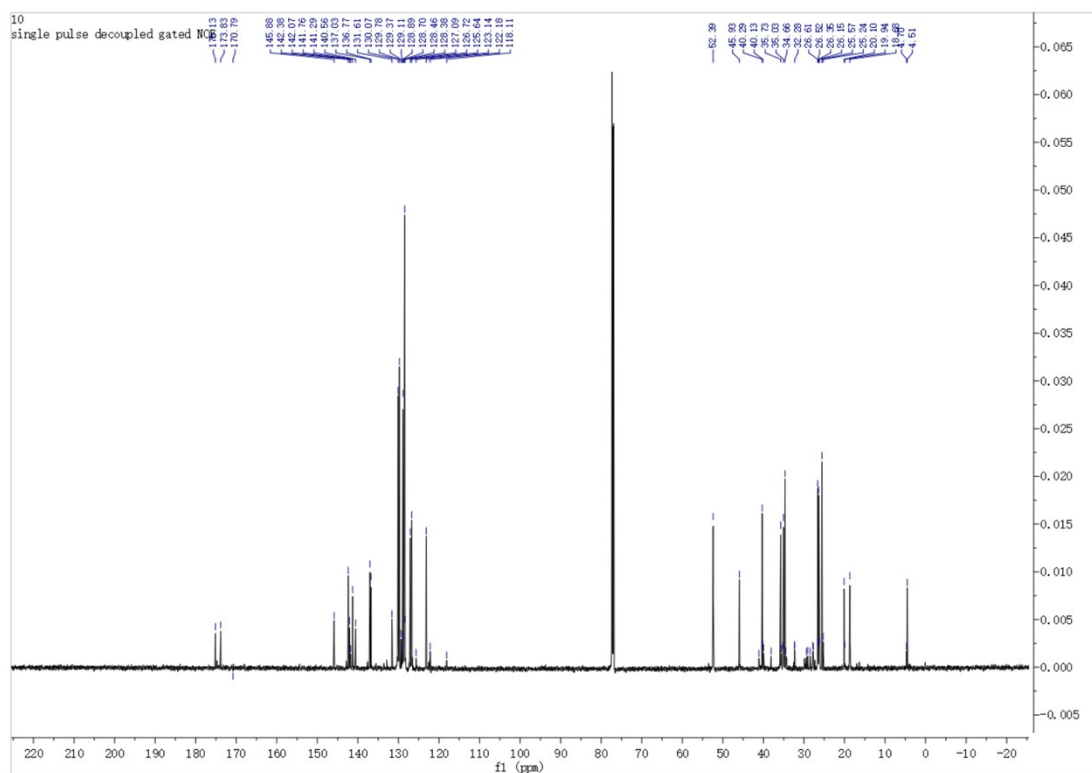

Figure S12.  $^{13}\text{C}$  NMR spectrum of Pd1 in  $\text{CDCl}_3$ .

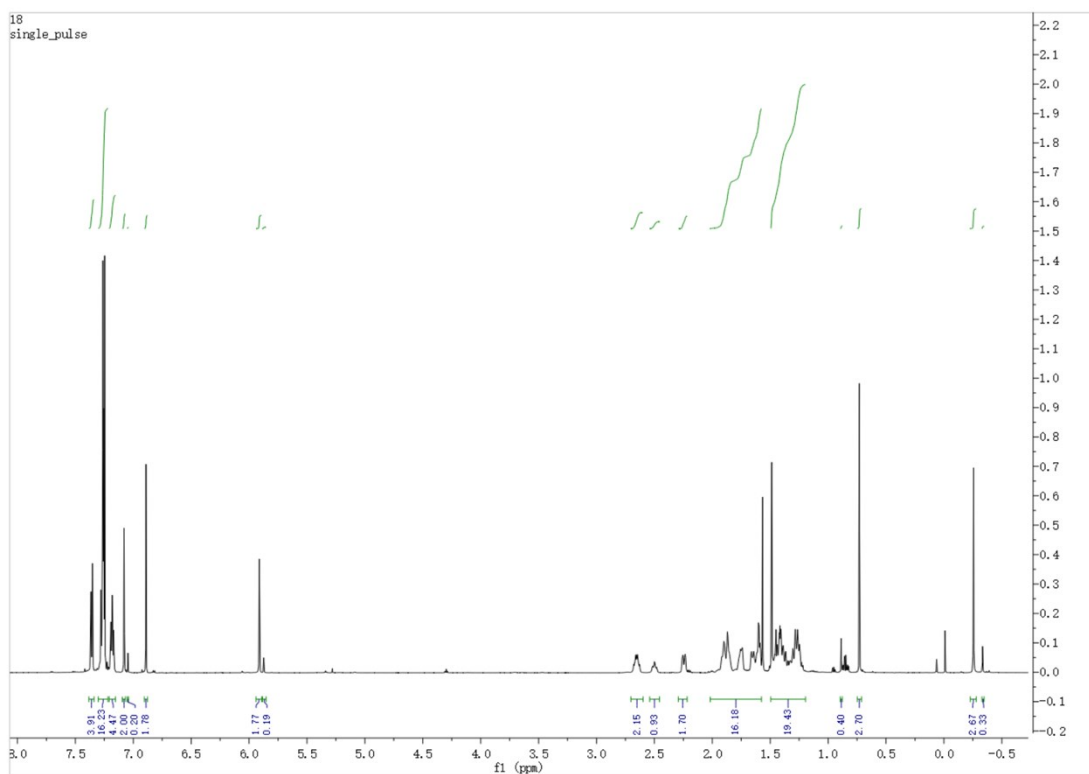

Figure S13.  $^1\text{H}$  NMR spectrum of Pd2 in  $\text{CDCl}_3$ .

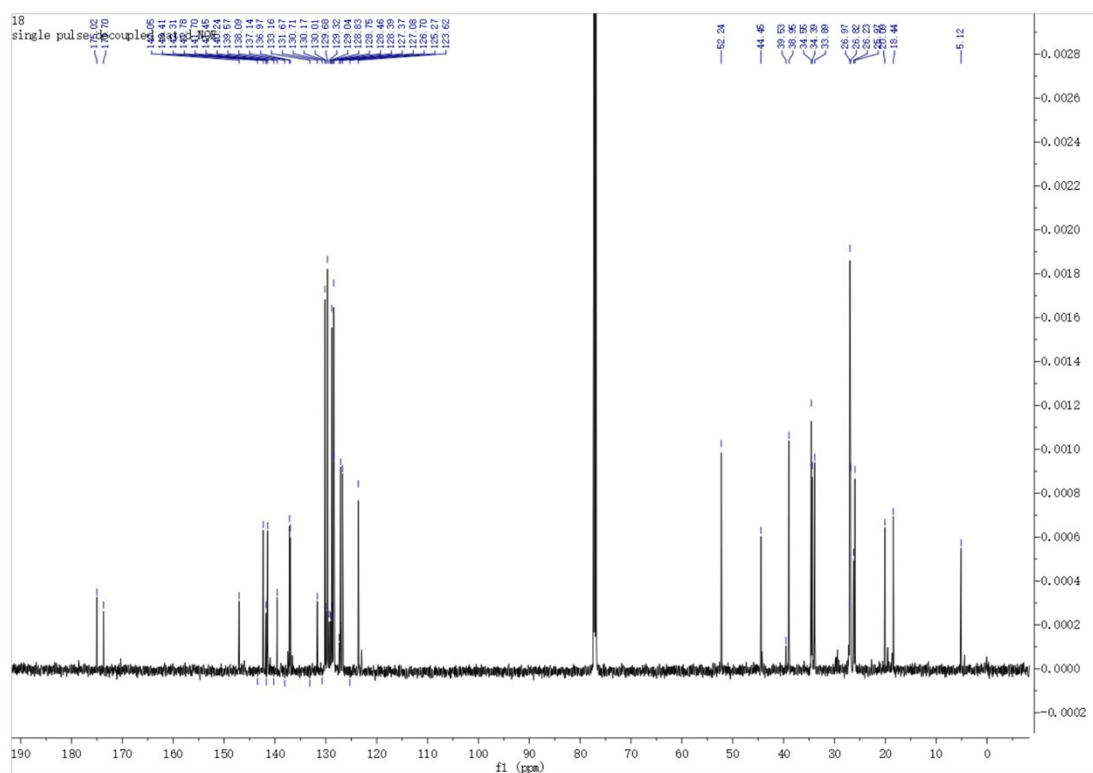

Figure S14.  $^{13}\text{C}$  NMR spectrum of Pd2 in  $\text{CDCl}_3$ .

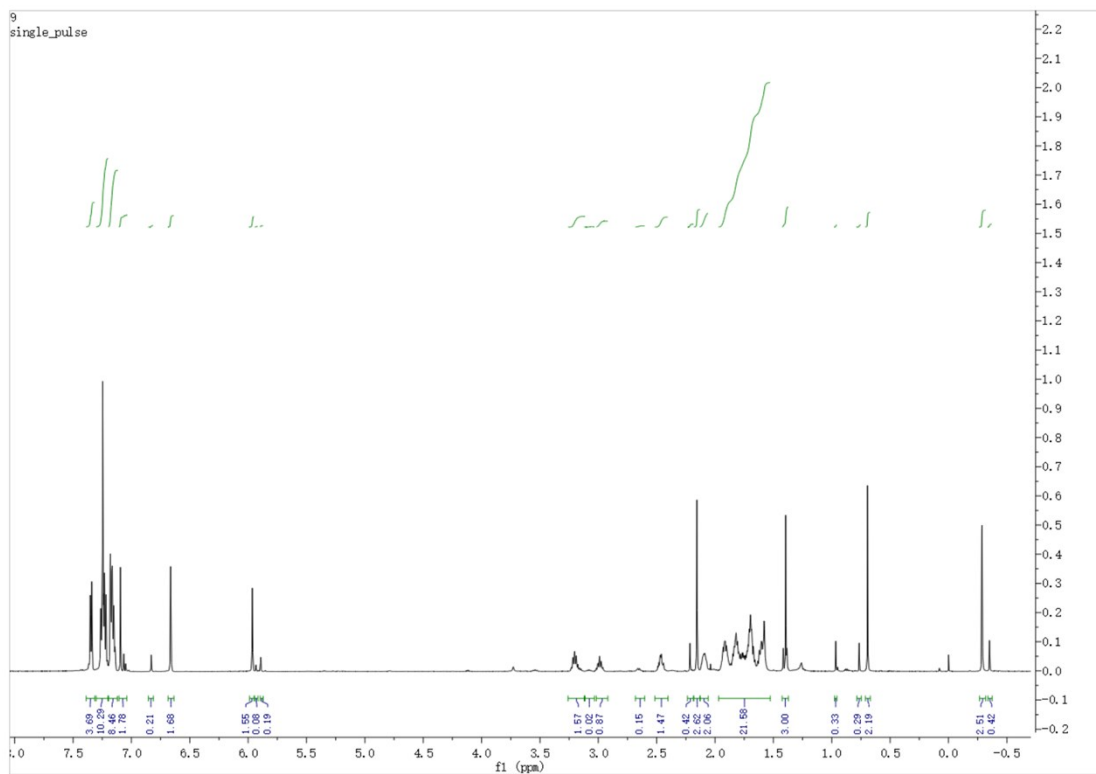

**Figure S15.** <sup>1</sup>H NMR spectrum of Pd3 in CDCl<sub>3</sub>.

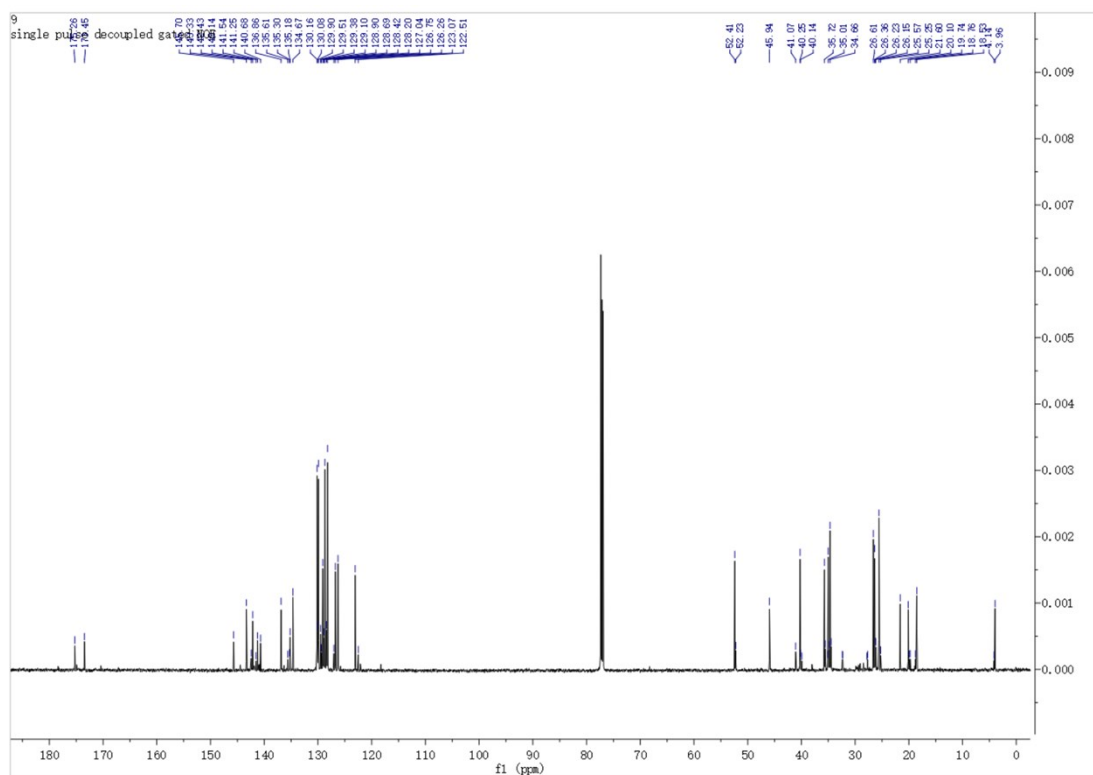

**Figure S16.** <sup>13</sup>C NMR spectrum of Pd3 in CDCl<sub>3</sub>.

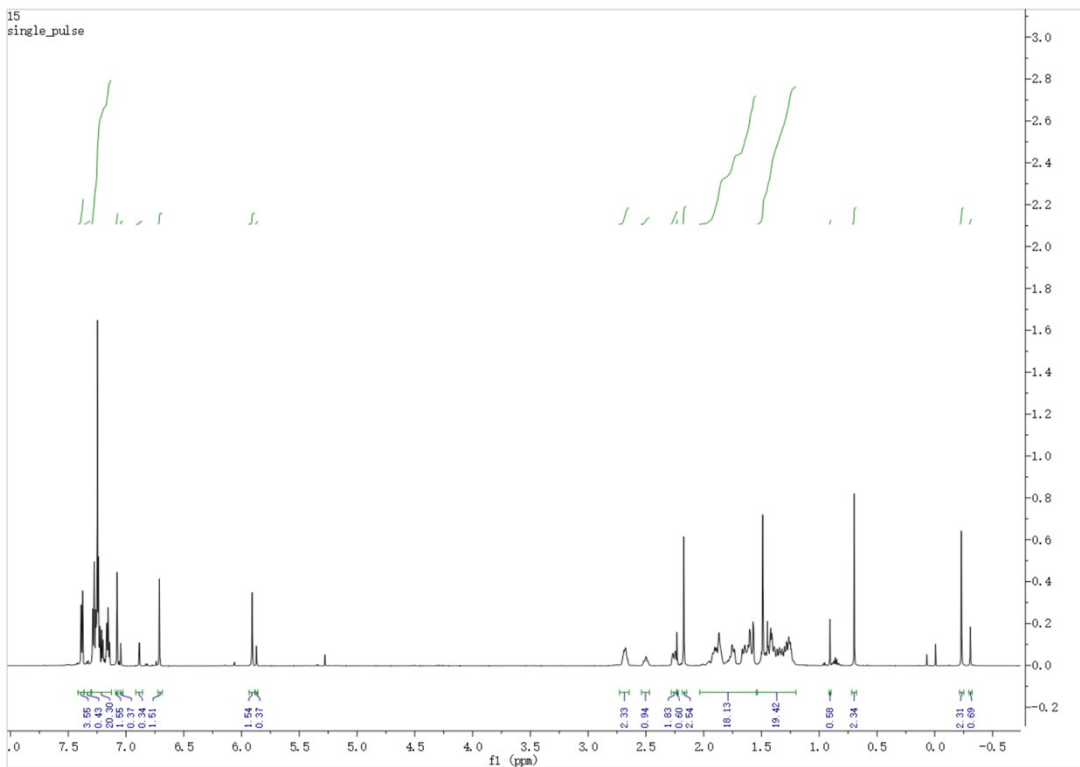

Figure S17.  $^1\text{H}$  NMR spectrum of Pd4 in  $\text{CDCl}_3$ .

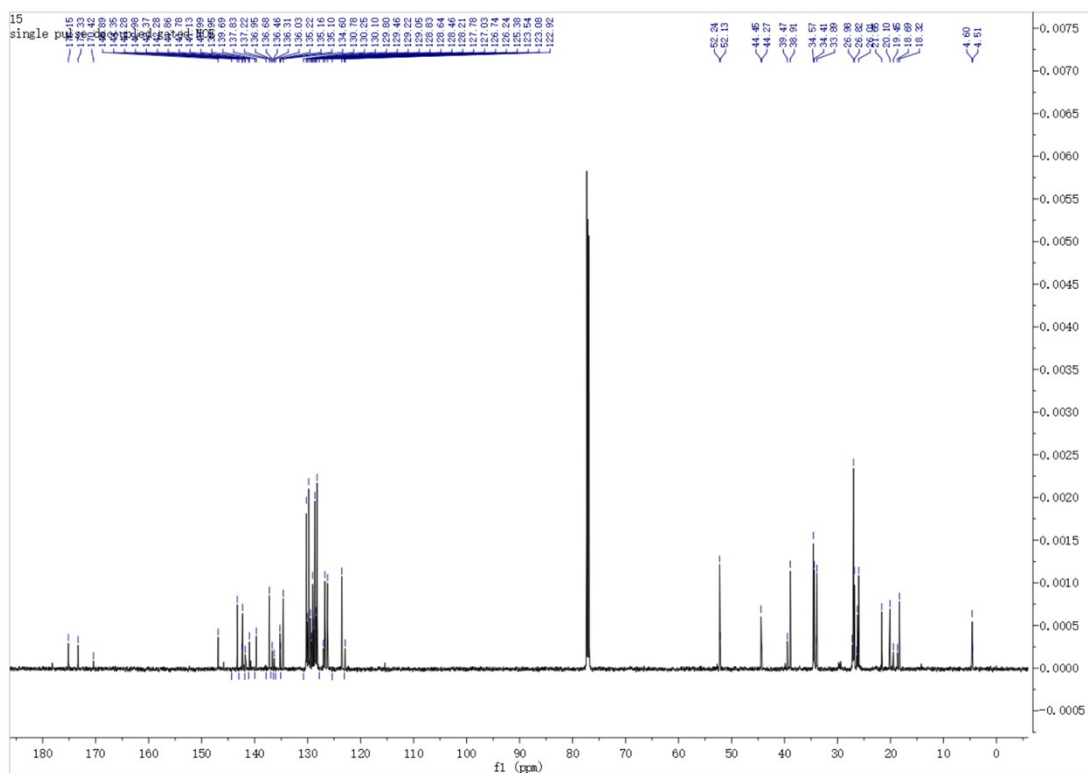

Figure S18.  $^{13}\text{C}$  NMR spectrum of Pd4 in  $\text{CDCl}_3$ .

### 3.2 HRMS and MALDI-TOF-MS Data.

LSK-L-Cl-CP\_201221153642 #10 RT: 0.11 AV: 1 SB: 1 0.07 NL: 3.61E8  
T: FTMS + c APCI corona Full ms [250.00-1200.00]

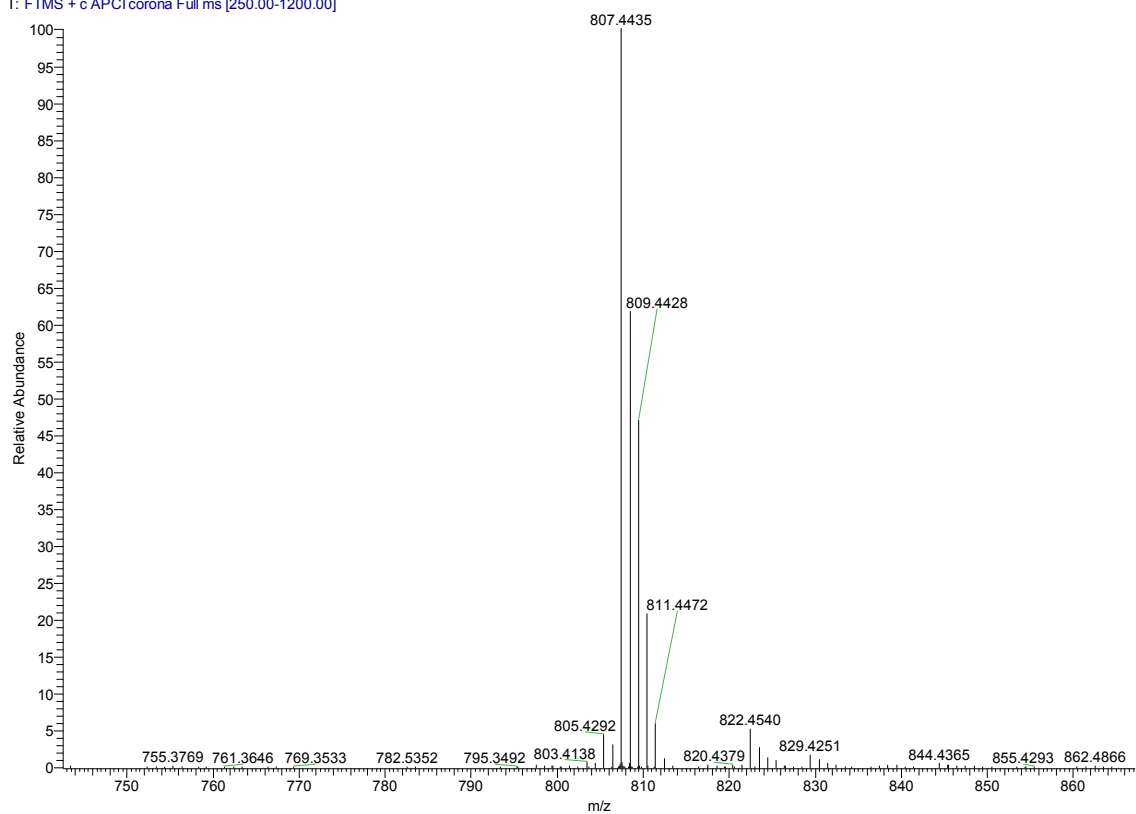

Figure S19. HRMS of L1.

LSK-L-CL-Cy\_201221153848 #8 RT: 0.09 AV: 1 NL: 5.72E7  
T: FTMS + c APCI corona Full ms [250.00-1200.00]

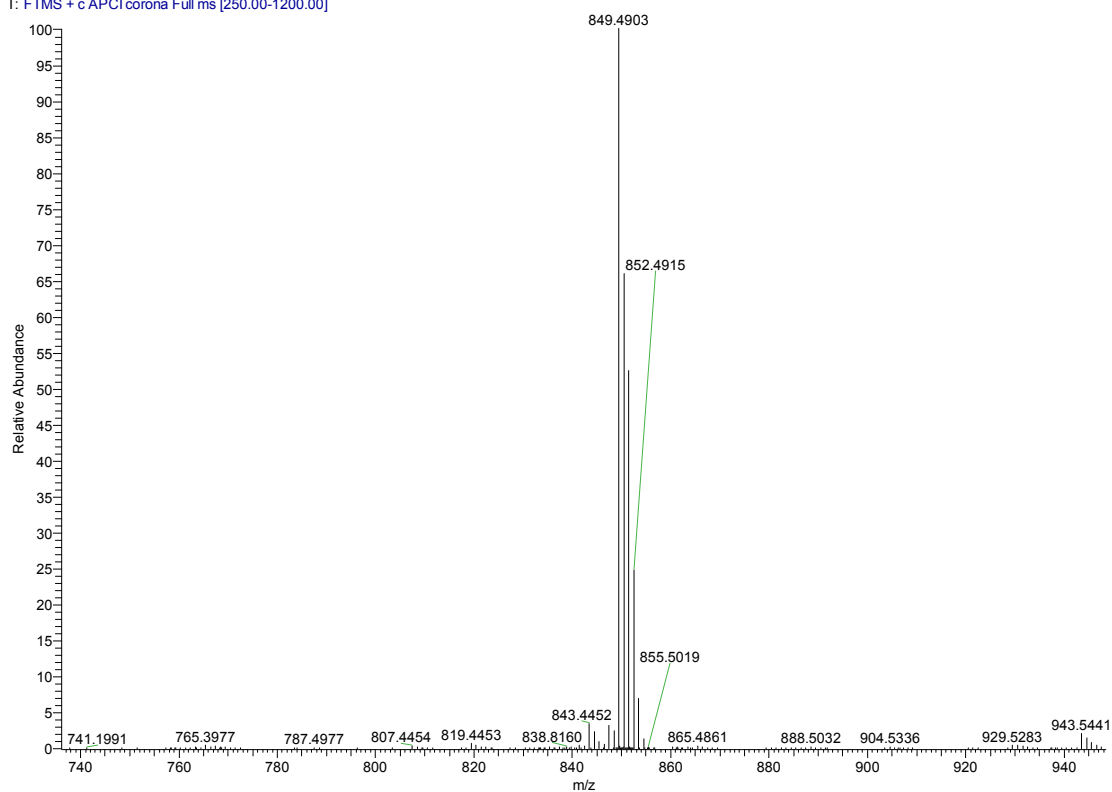

Figure S20. HRMS of L2.

LSK-L-Me-Cp\_201221154053 #12 RT: 0.10 AV: 1 NL: 2.83E8  
T: FTMS + c APCI corona Full ms [250.00-1200.00]

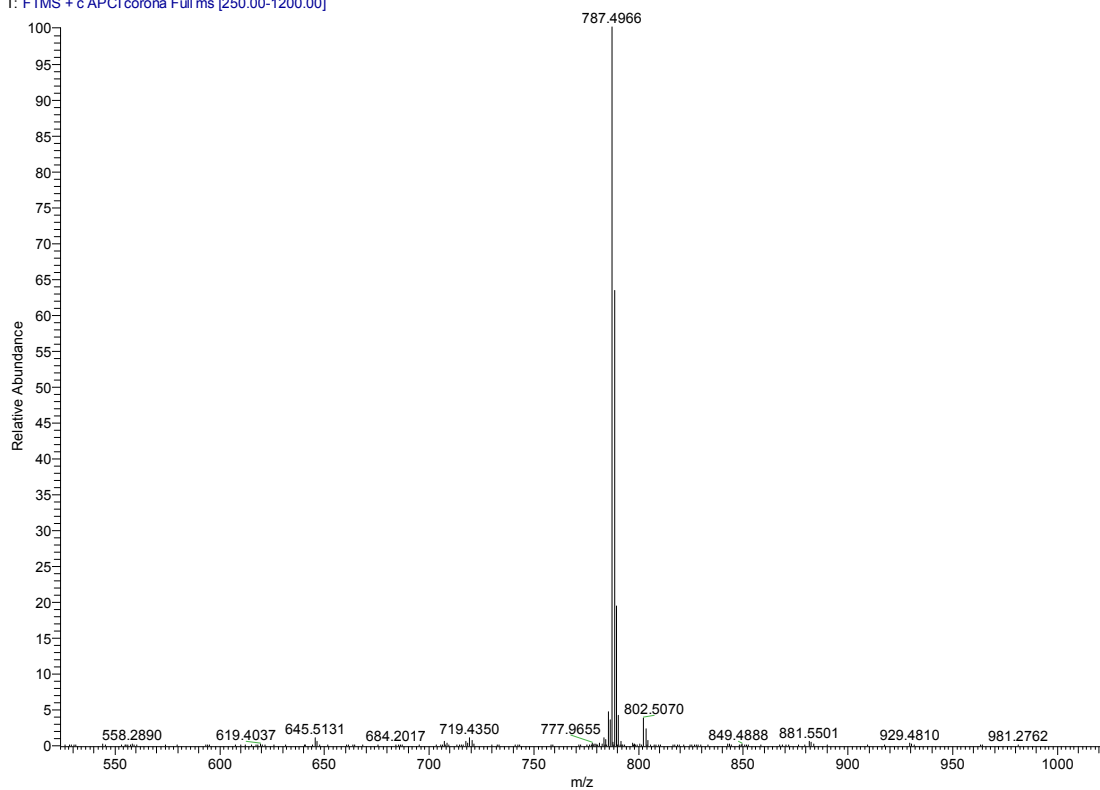

Figure S21. HRMS of L3.

LSK-L-Me-Cy\_201221154254 #12 RT: 0.10 AV: 1 NL: 1.98E7  
T: FTMS + c APCI corona Full ms [250.00-1200.00]

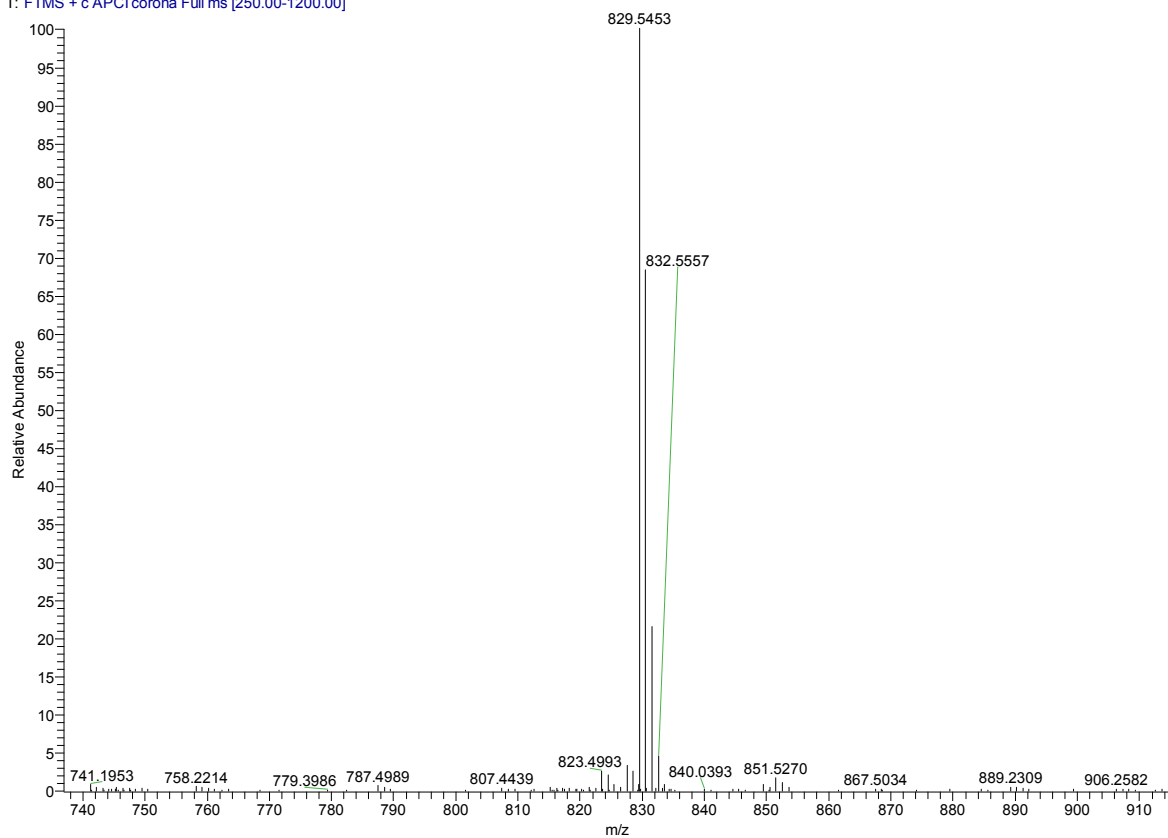

Figure S22. HRMS of L4.

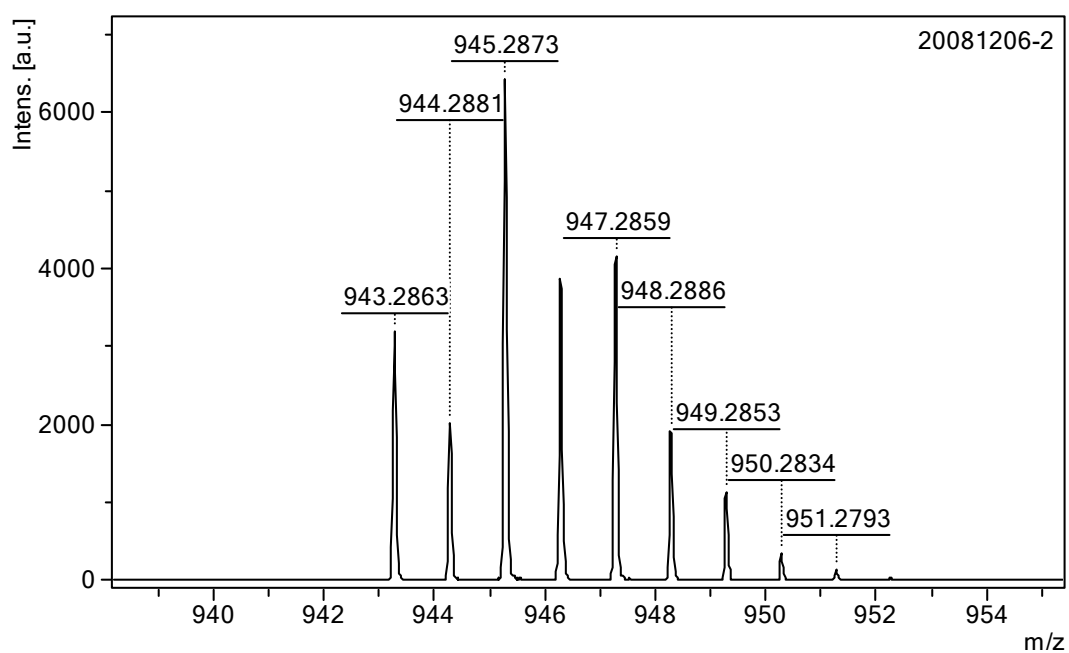

**Figure S23.** MALDI-TOF-MS of complex Ni1.

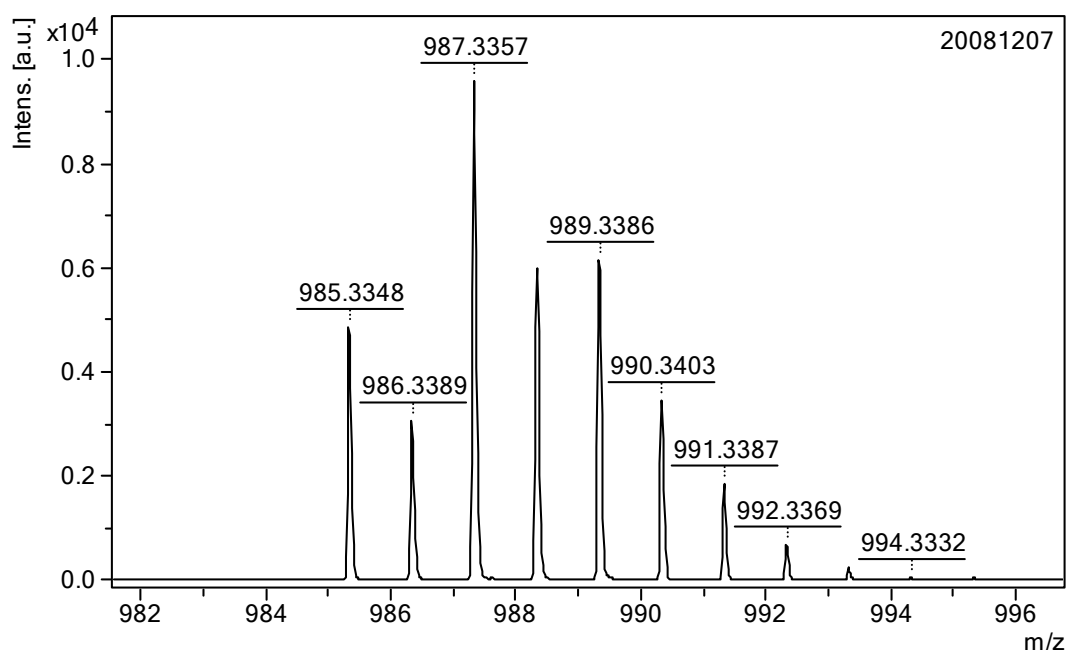

**Figure S24.** MALDI-TOF-MS of complex Ni2.



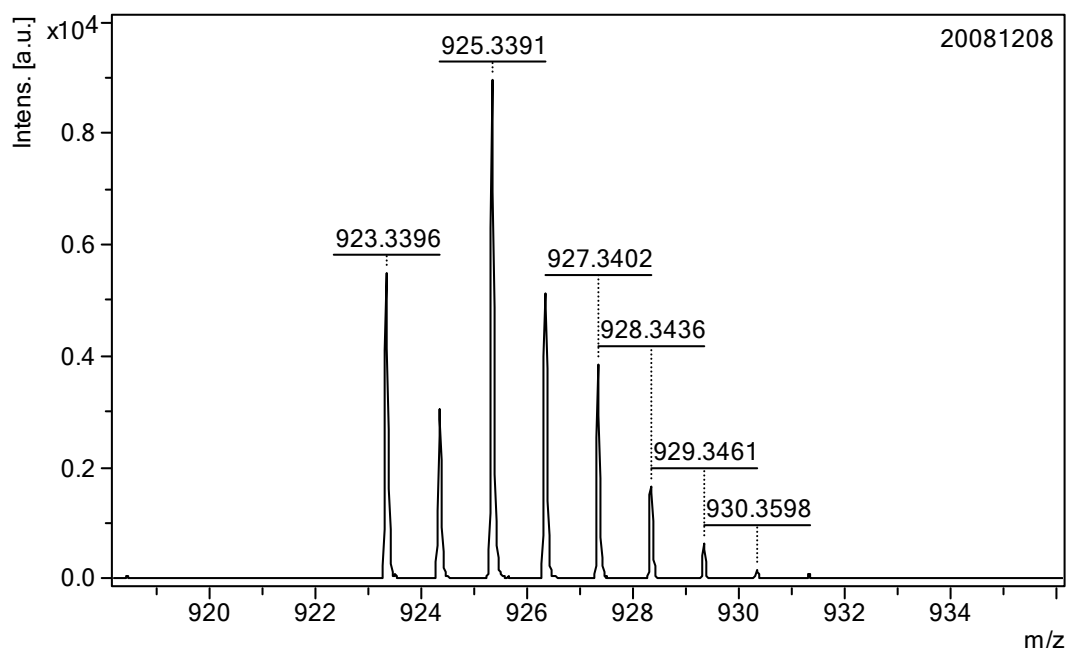

**Figure S25.** MALDI-TOF-MS of complex **Ni3**.

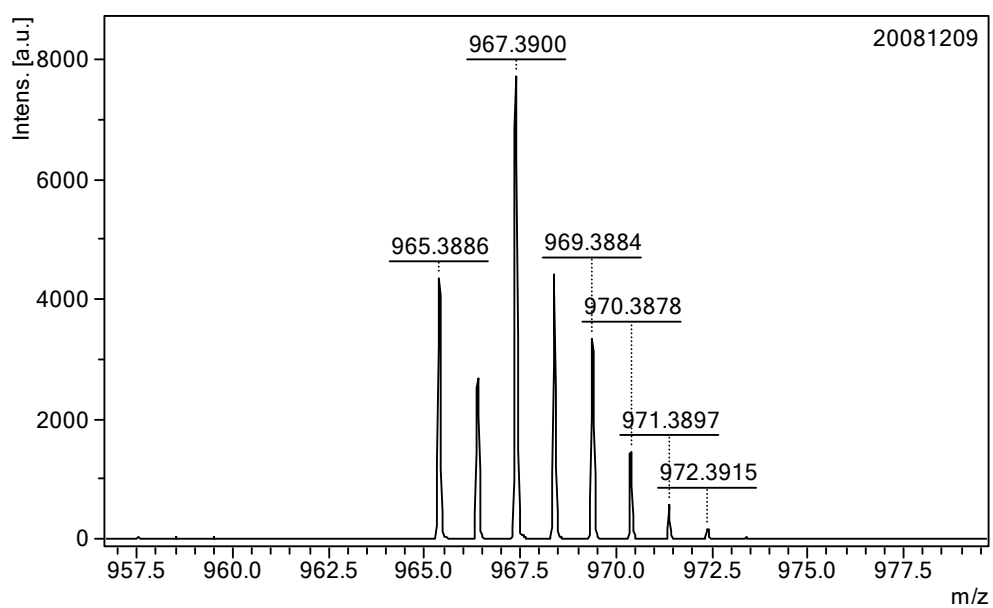

**Figure S26.** MALDI-TOF-MS of complex **Ni4**.

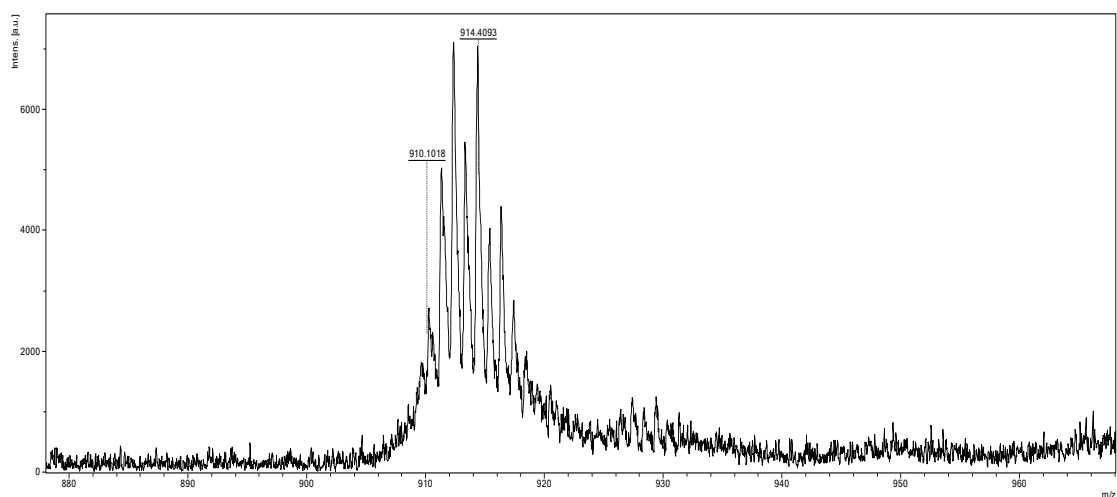

**Figure S27.** MALDI-TOF-MS of complex Pd1.

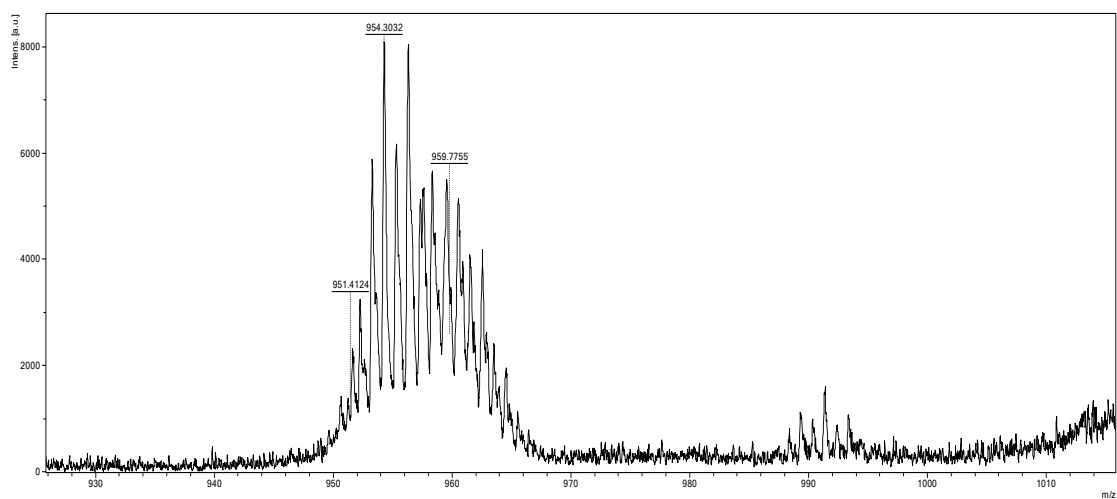

**Figure S28.** MALDI-TOF-MS of complex Pd2.

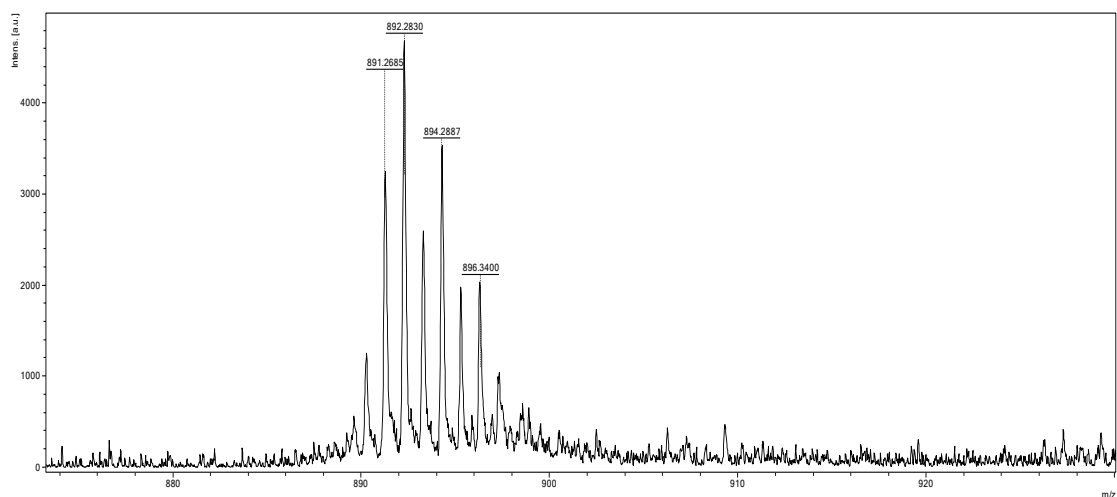

**Figure S29.** MALDI-TOF-MS of complex Pd3.

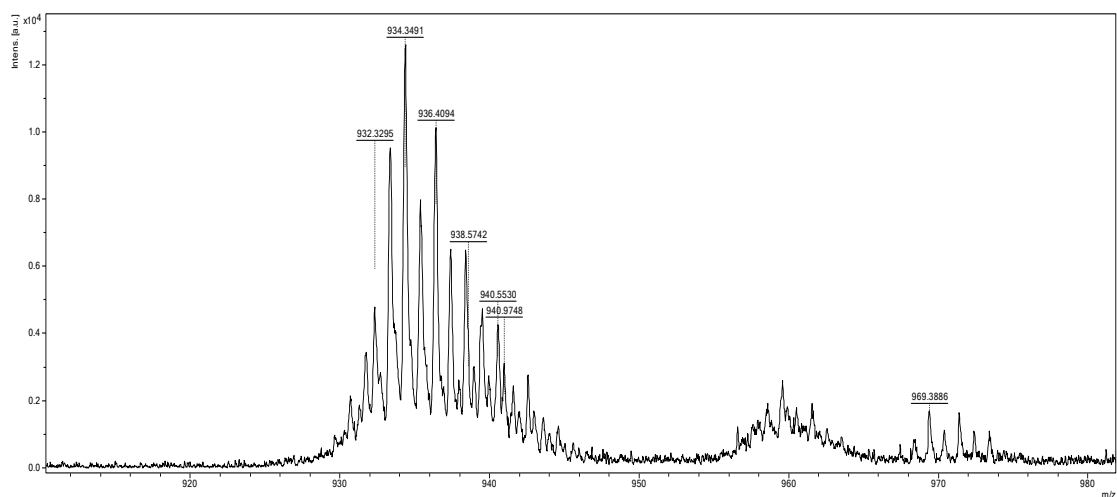

**Figure S30.** MALDI-TOF-MS of complex Pd4.

### 3.3 $^1\text{H}$ and $^{13}\text{C}$ NMR of Polymers.

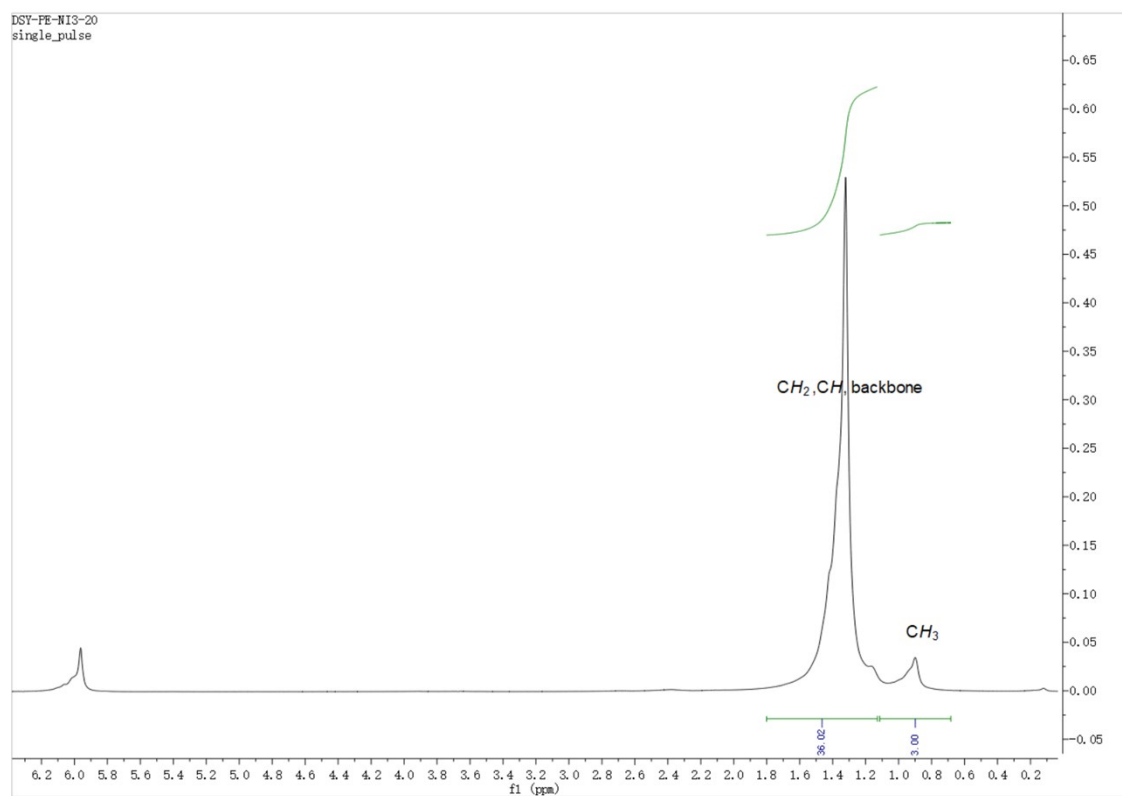

**Figure S31.**  $^1\text{H}$  NMR spectrum of the polymer from table 1, entry 7 ( $\text{CDCl}_2\text{CDCl}_2$ ,  $120\text{ }^\circ\text{C}$ ).

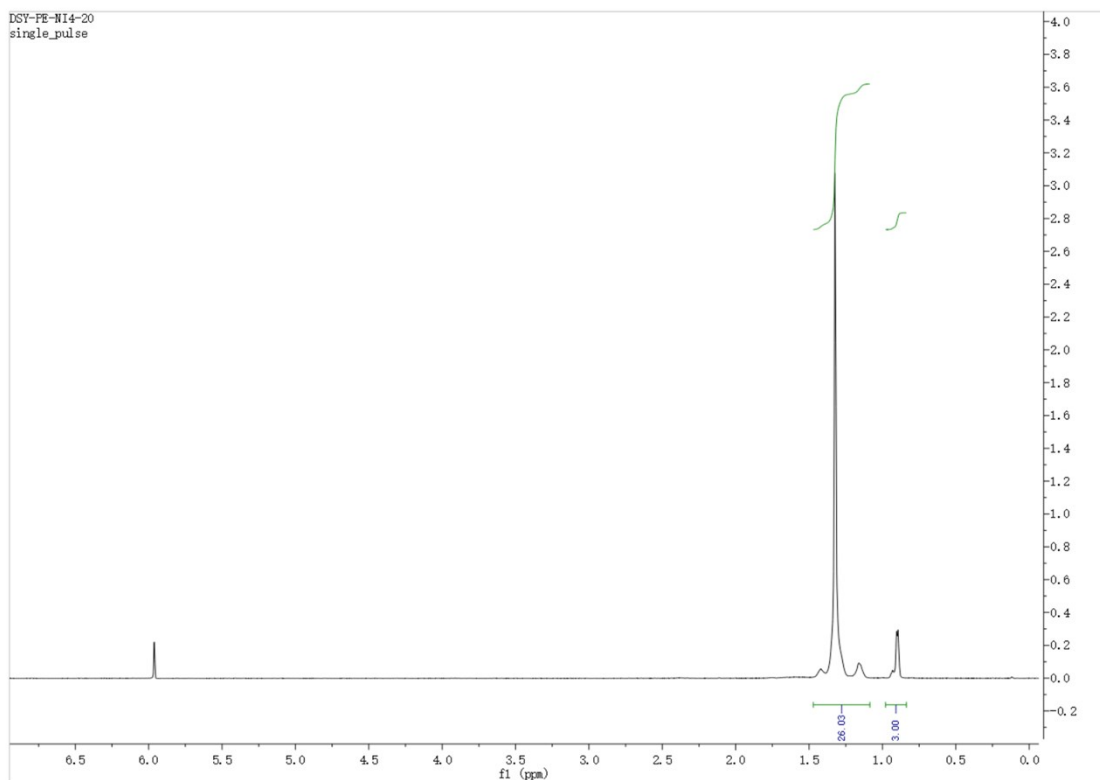

**Figure S32.**  $^1\text{H}$  NMR spectrum of the polymer from table 1, entry 10 ( $\text{CDCl}_2\text{CDCl}_2$ ,  $120^\circ\text{C}$ ).

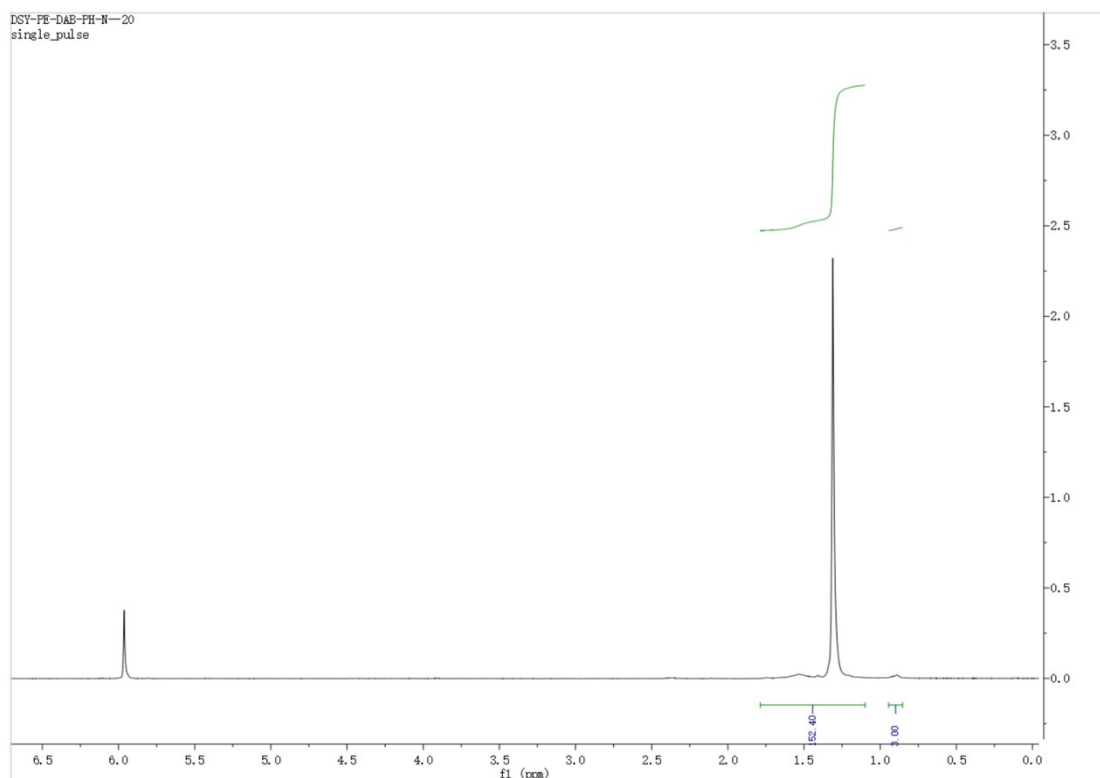

**Figure S33.**  $^1\text{H}$  NMR spectrum of the polymer from table 1, entry 13 ( $\text{CDCl}_2\text{CDCl}_2$ ,  $120^\circ\text{C}$ ).

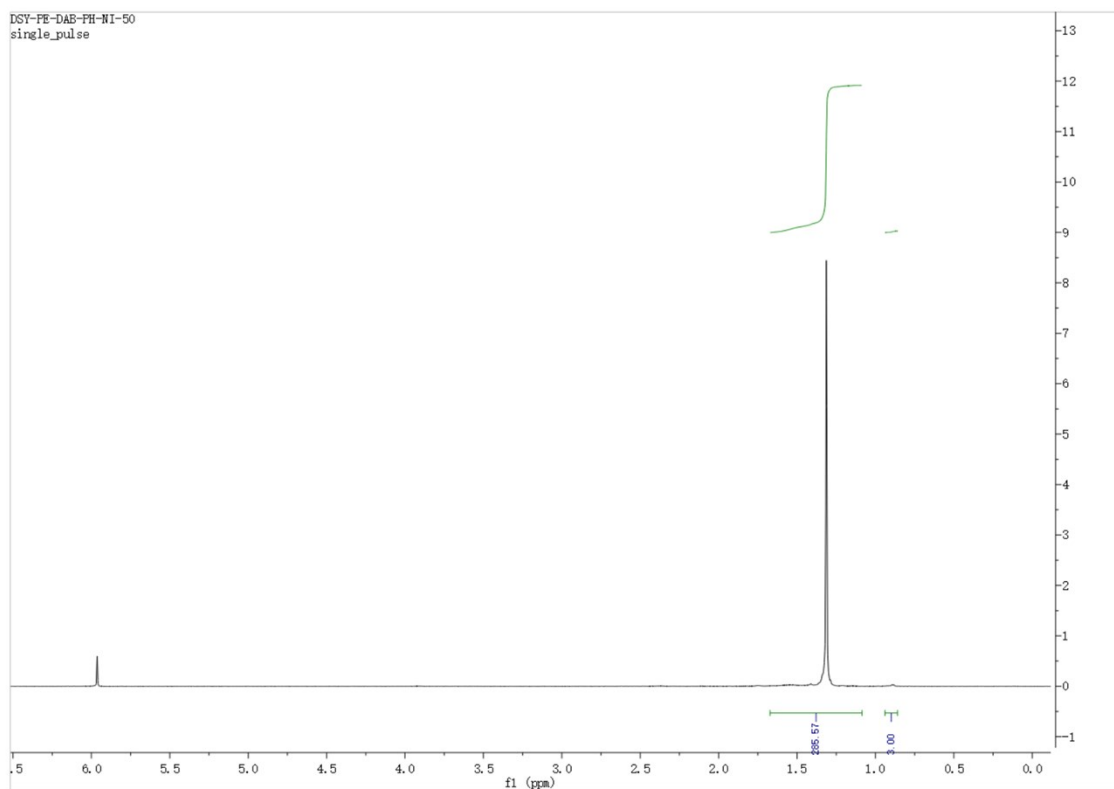

**Figure S34.**  $^1\text{H}$  NMR spectrum of the polymer from table 1, entry 14 ( $\text{CDCl}_2\text{CDCl}_2$ ,  $120\text{ }^\circ\text{C}$ ).

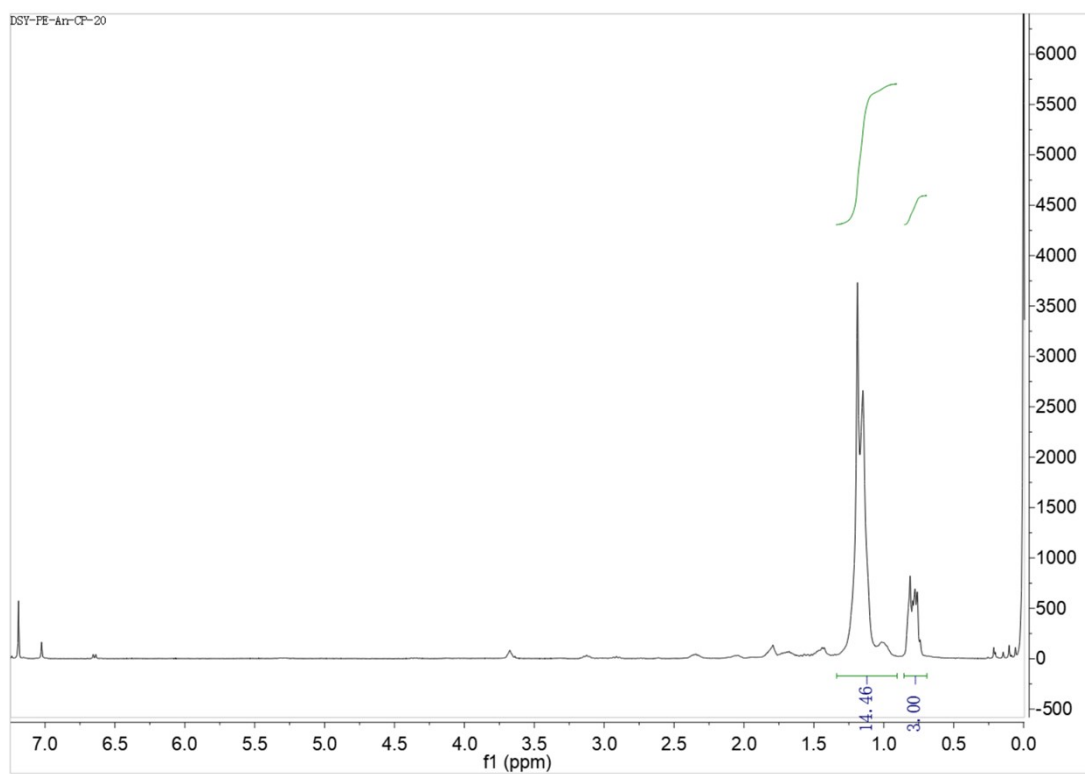

**Figure S35.**  $^1\text{H}$  NMR spectrum of the polymer from table 2, entry 1 ( $\text{CDCl}_3$ ,  $20\text{ }^\circ\text{C}$ ).

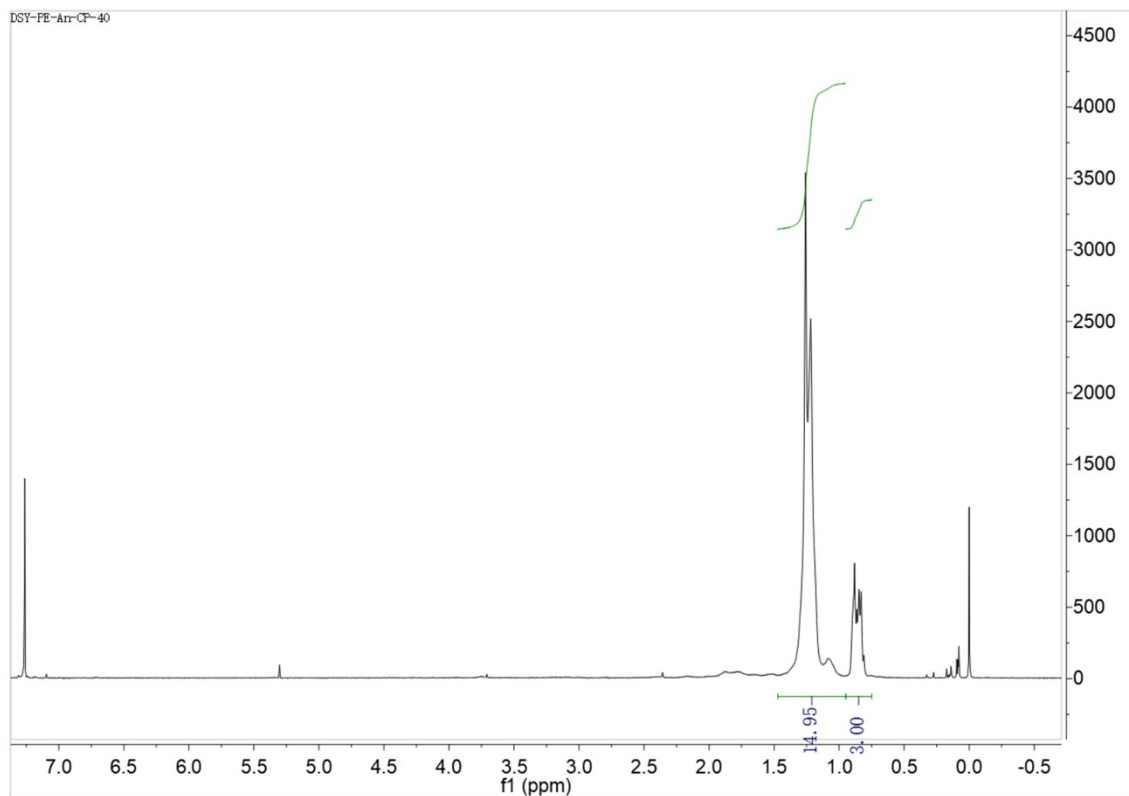

**Figure S36.**  $^1\text{H}$  NMR spectrum of the polymer from table 2, entry 2 ( $\text{CDCl}_3$ , 20  $^\circ\text{C}$ ).

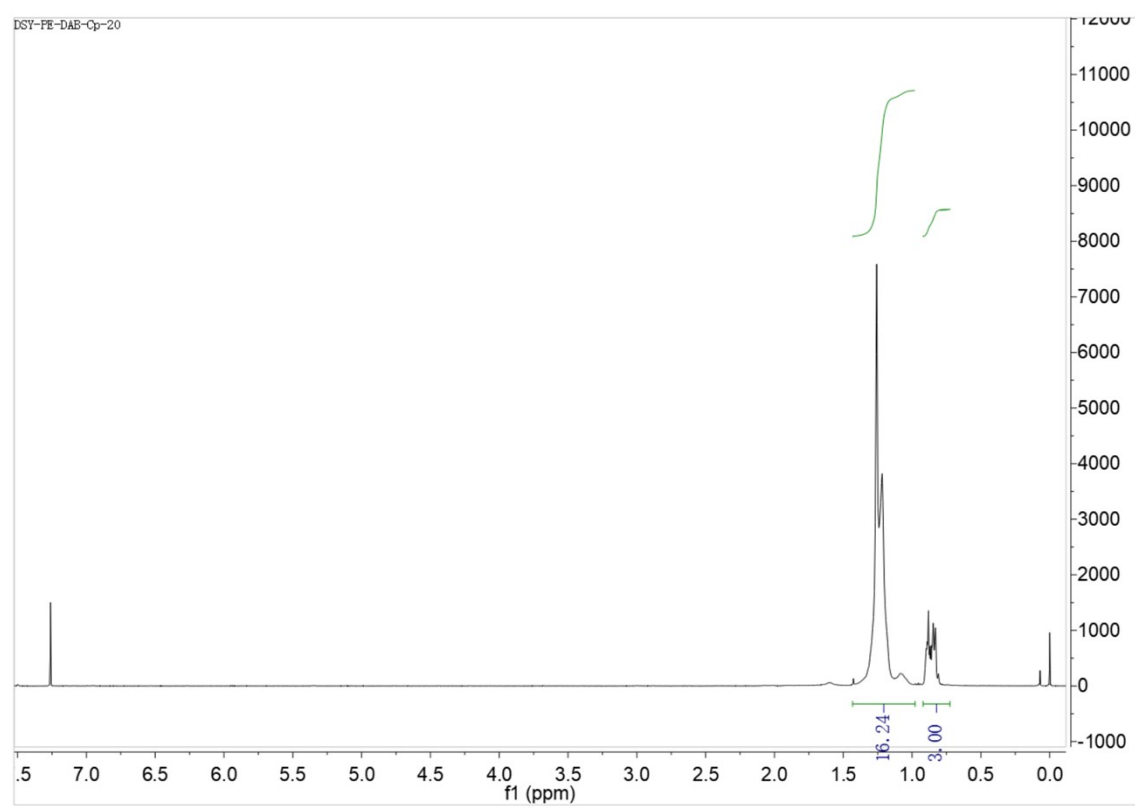

**Figure S37.**  $^1\text{H}$  NMR spectrum of the polymer from table 2, entry 5 ( $\text{CDCl}_3$ , 20  $^\circ\text{C}$ ).

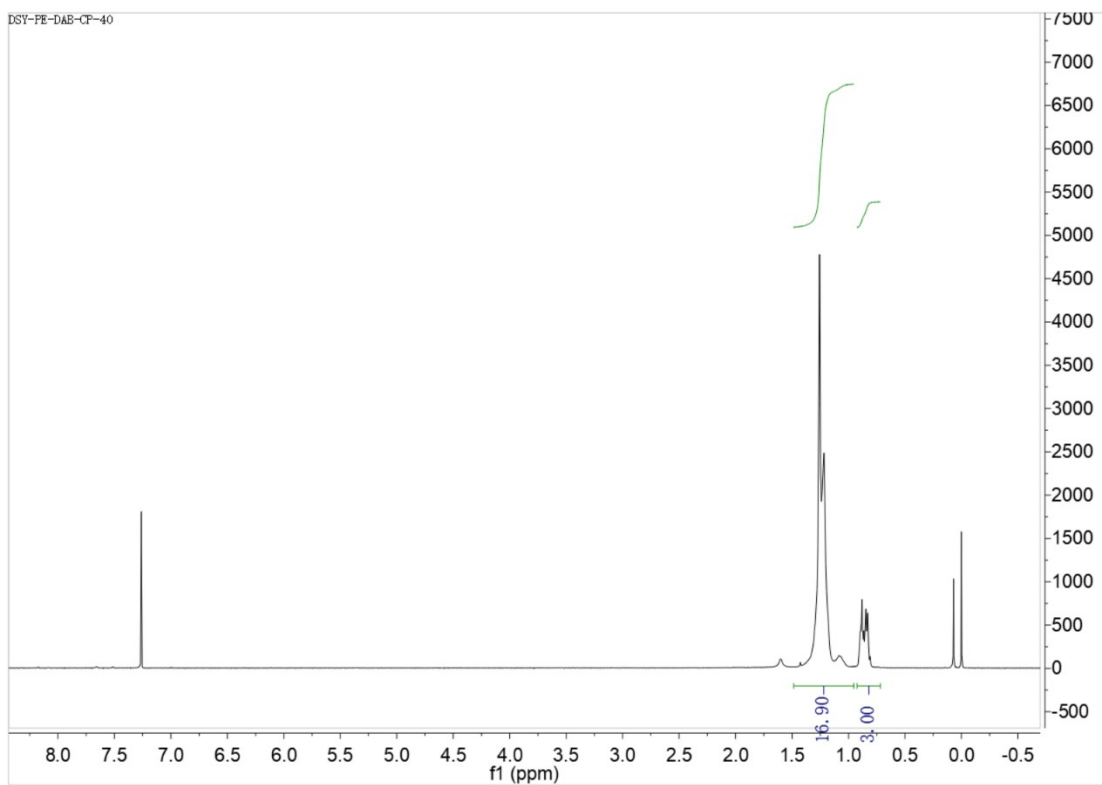

**Figure S38.**  $^1\text{H}$  NMR spectrum of the polymer from table 2, entry 6 ( $\text{CDCl}_3$ , 20  $^\circ\text{C}$ ).

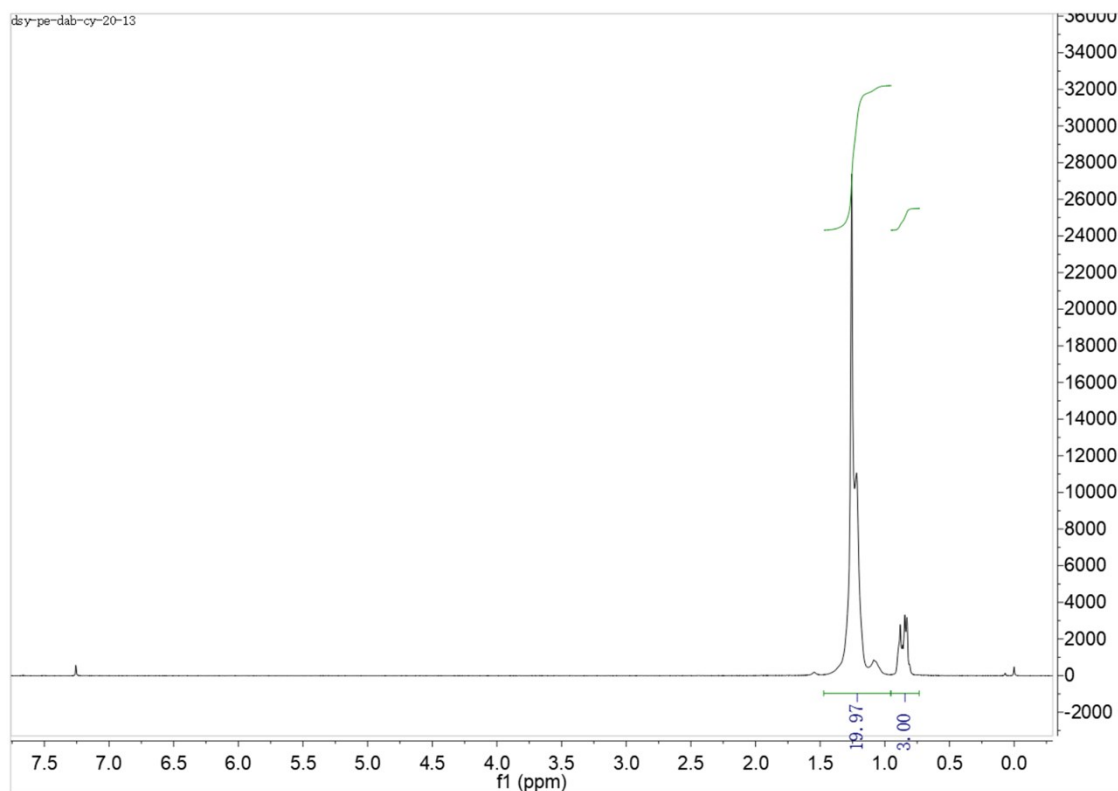

**Figure S39.**  $^1\text{H}$  NMR spectrum of the polymer from table 2, entry 7 ( $\text{CDCl}_3$ , 20  $^\circ\text{C}$ ).

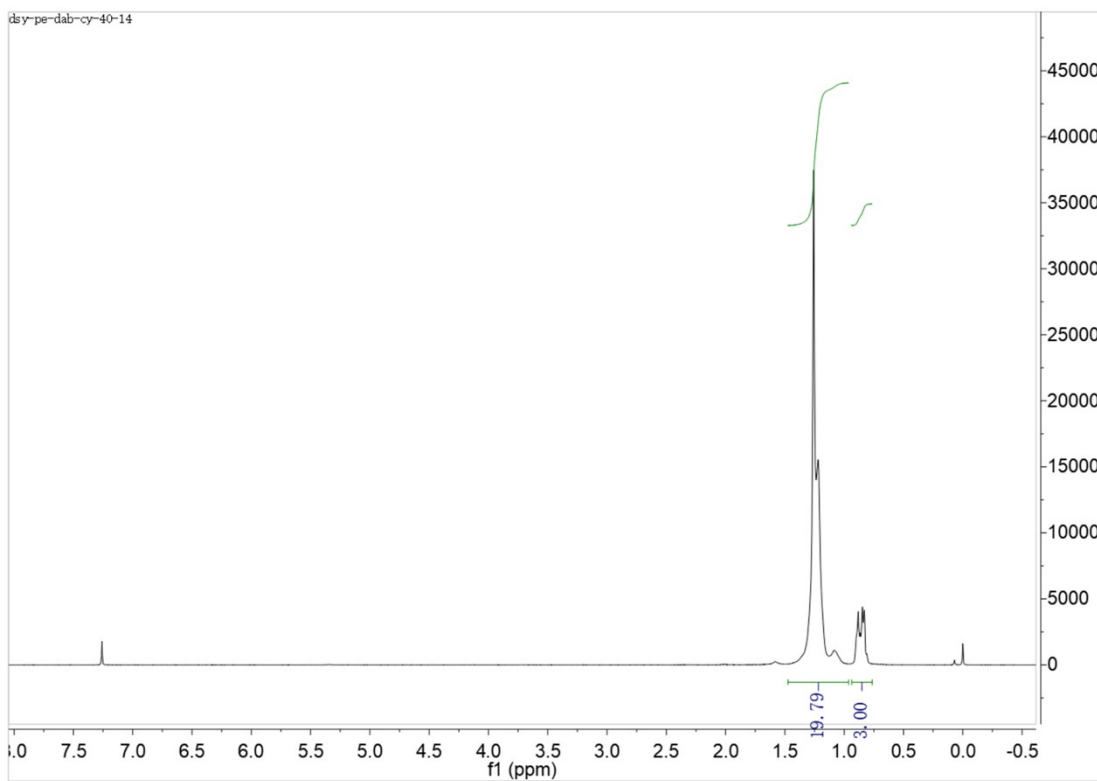

**Figure S40.**  $^1\text{H}$  NMR spectrum of the polymer from table 2, entry 8 ( $\text{CDCl}_3$ , 20  $^\circ\text{C}$ ).

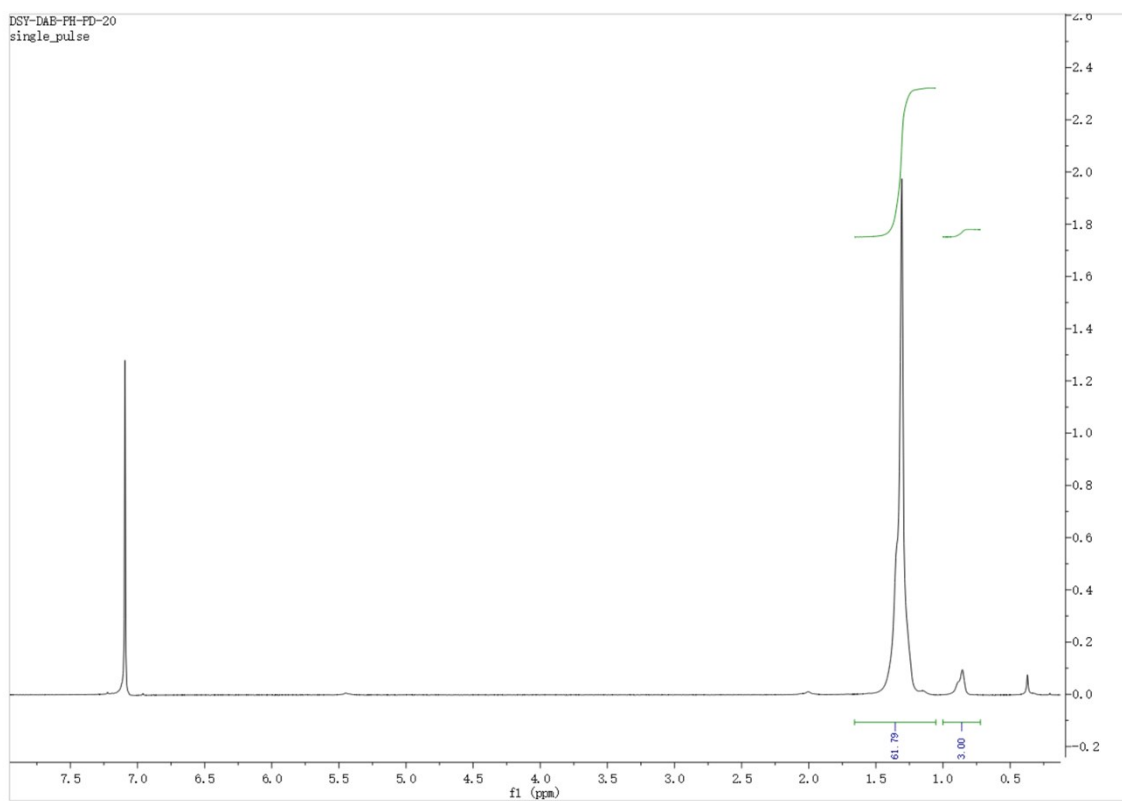

**Figure S41.**  $^1\text{H}$  NMR spectrum of the polymer from table 2, entry 9 ( $\text{CDCl}_3$ , 20  $^\circ\text{C}$ ).



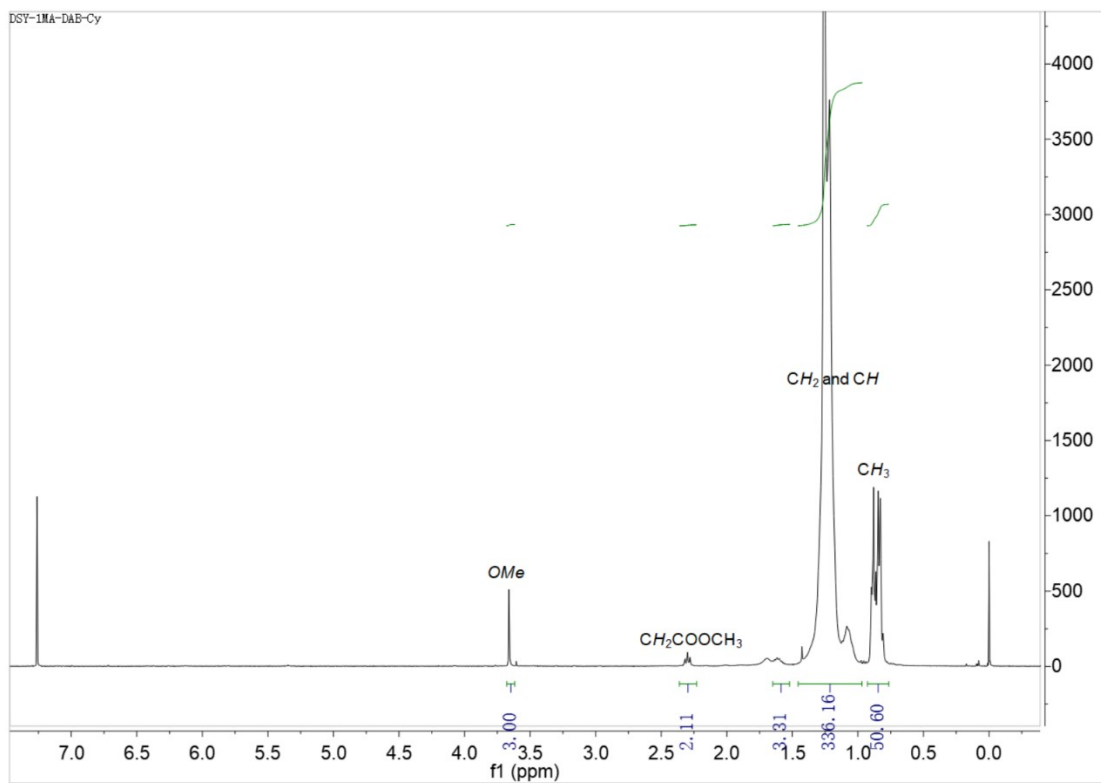

**Figure S42.** <sup>1</sup>H NMR spectrum of the polymer from table 3, entry 11 (CDCl<sub>3</sub>, 20 °C).

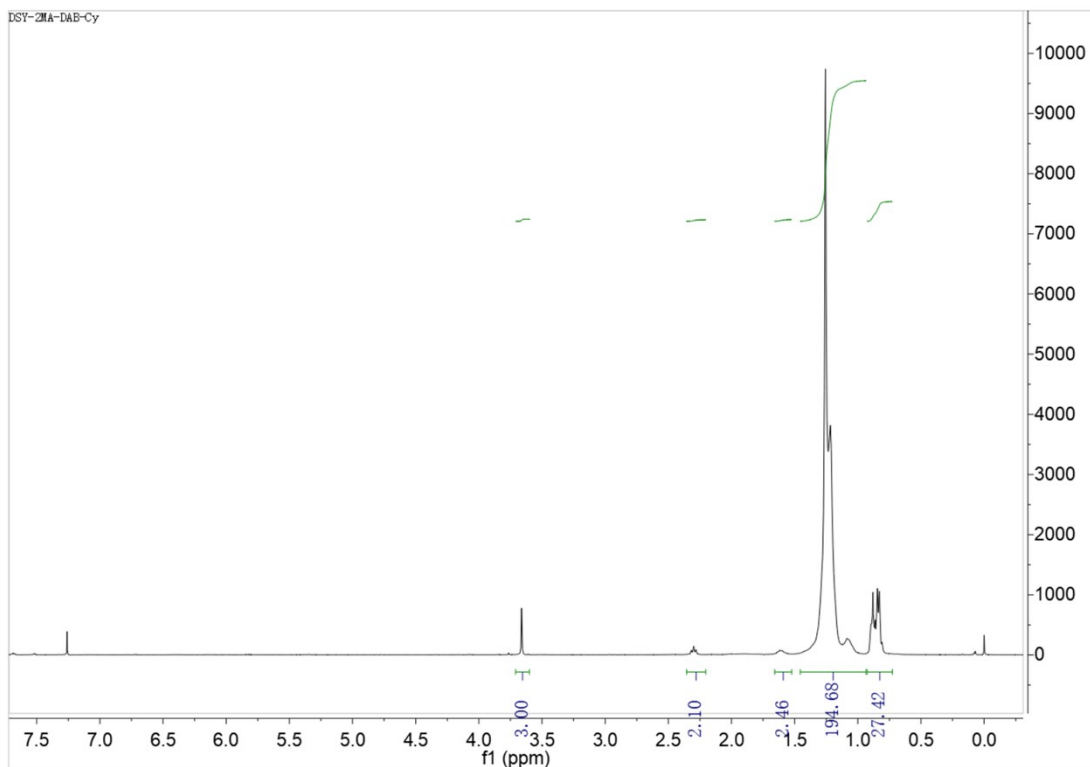

**Figure S43.** <sup>1</sup>H NMR spectrum of the polymer from table 3, entry 12 (CDCl<sub>3</sub>, 20 °C).

### 3.4 DSC and GPC of Polymers.

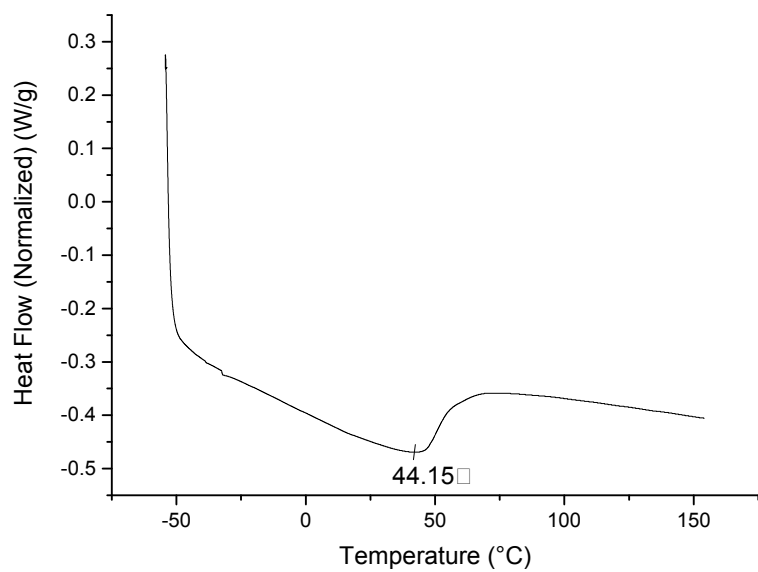

Figure S44. DSC of the polymer from table 1, entry 1.

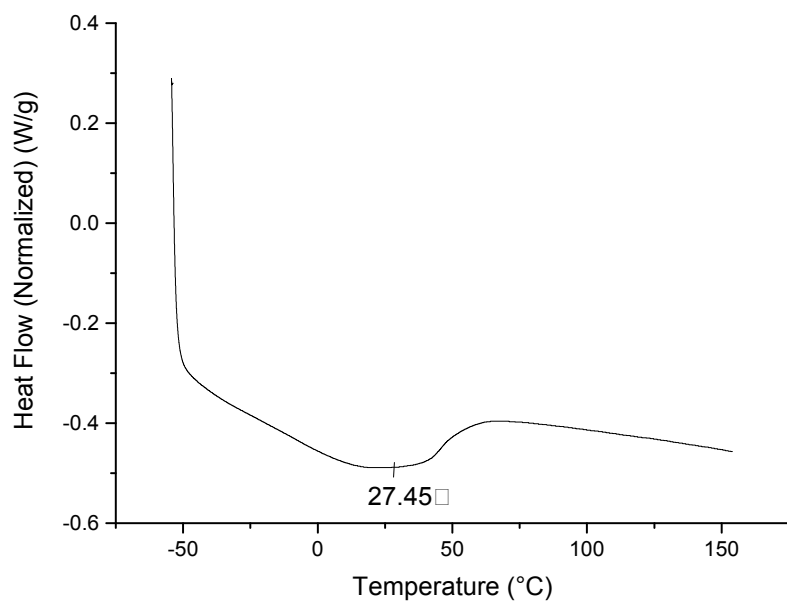

Figure S45. DSC of the polymer from table 1, entry 6.

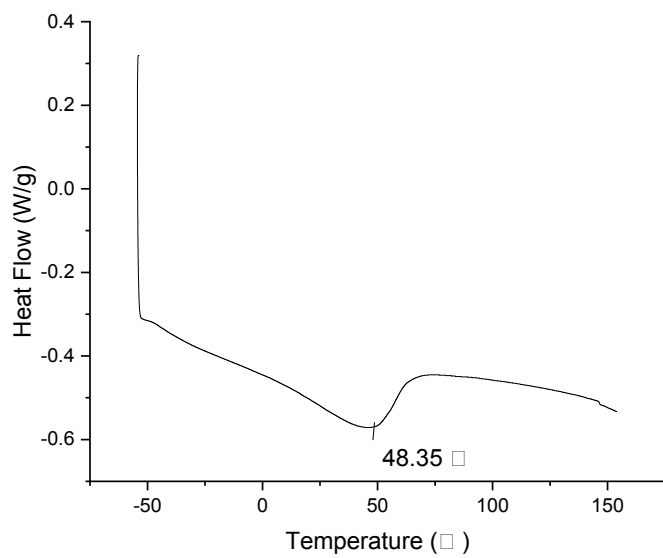

**Figure S46.** DSC of the polymer from table 1, entry 7.

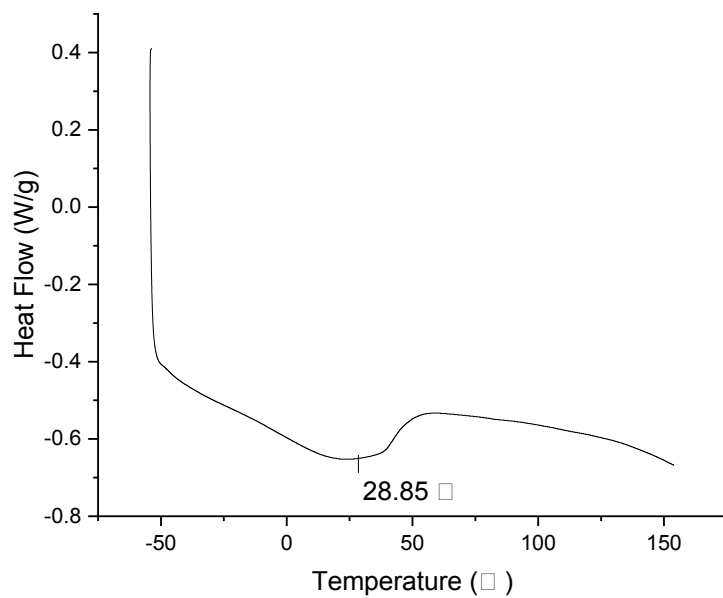

**Figure S47.** DSC of the polymer from table 1, entry 11.

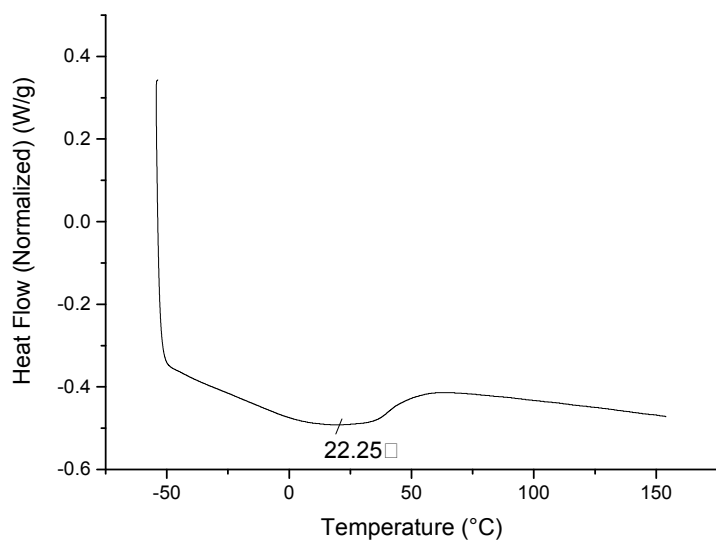

**Figure S48.** DSC of the polymer from table 1, entry 12.

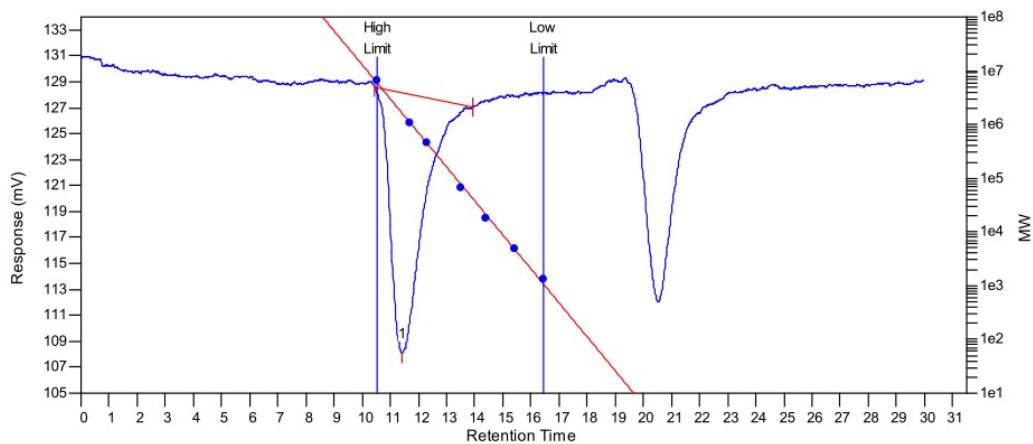

Distribution Plots

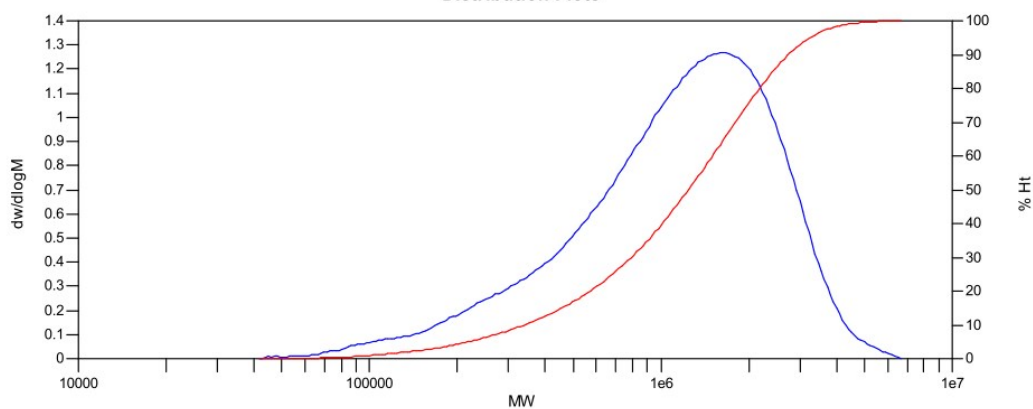

**MW Averages**

| Peak No | Mp      | Mn     | Mw      | Mz      | Mz+1    | Mv      | PD      |
|---------|---------|--------|---------|---------|---------|---------|---------|
| 1       | 1631216 | 707407 | 1408769 | 2057334 | 2618705 | 1312319 | 1.99145 |

**Processed Peaks**

| Peak No | Name | Start RT (mins) | Max RT (mins) | End RT (mins) | Pk Height (mV) | % Height | Area (mV.secs) | % Area |
|---------|------|-----------------|---------------|---------------|----------------|----------|----------------|--------|
| 1       |      | 10.45           | 11.42         | 13.93         | -20.0765       | 100      | 1501.34        | 100    |

Figure S49. GPC of the polymer from table 1, entry 1.

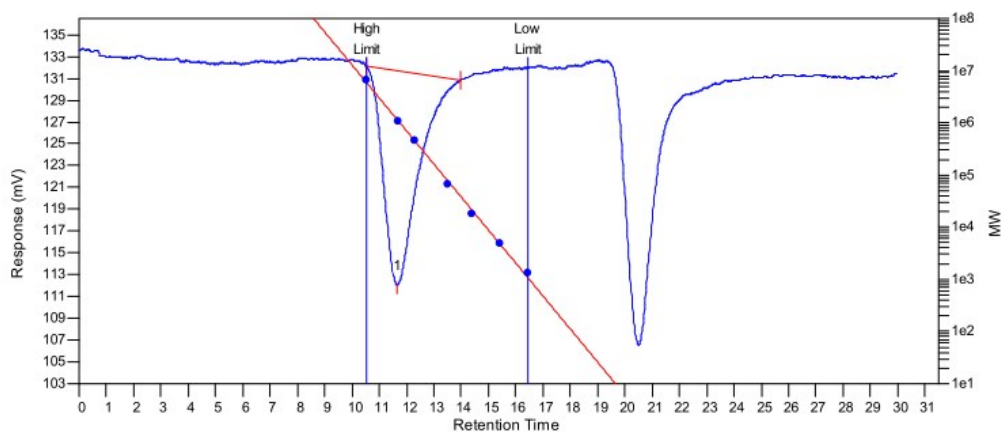

Distribution Plots

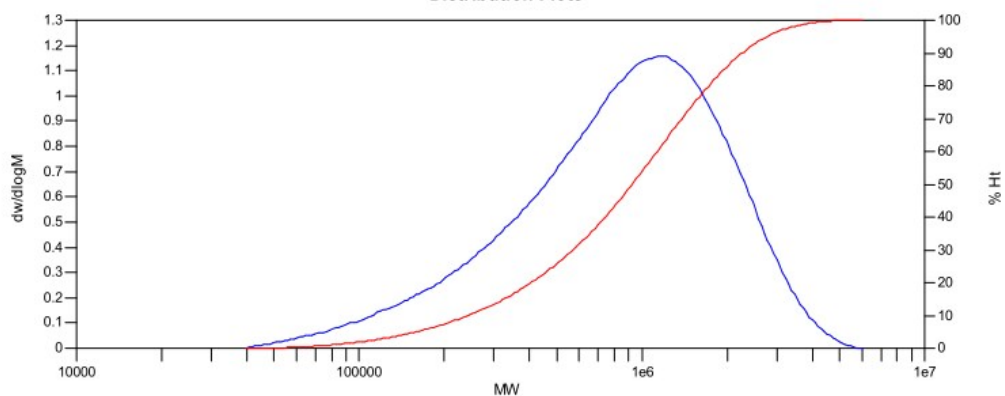

**MW Averages**

| Peak No | Mp      | Mn     | Mw      | Mz      | Mz+1    | Mv      | PD      |
|---------|---------|--------|---------|---------|---------|---------|---------|
| 1       | 1161277 | 525518 | 1105525 | 1721725 | 2280341 | 1018596 | 2.10369 |

**Processed Peaks**

| Peak No | Name | Start RT (mins) | Max RT (mins) | End RT (mins) | Pk Height (mV) | % Height | Area (mV.secs) | % Area |
|---------|------|-----------------|---------------|---------------|----------------|----------|----------------|--------|
| 1       |      | 10.52           | 11.65         | 13.97         | -19.6208       | 100      | 1607.71        | 100    |

Figure S50. GPC of the polymer from table 1, entry 2.

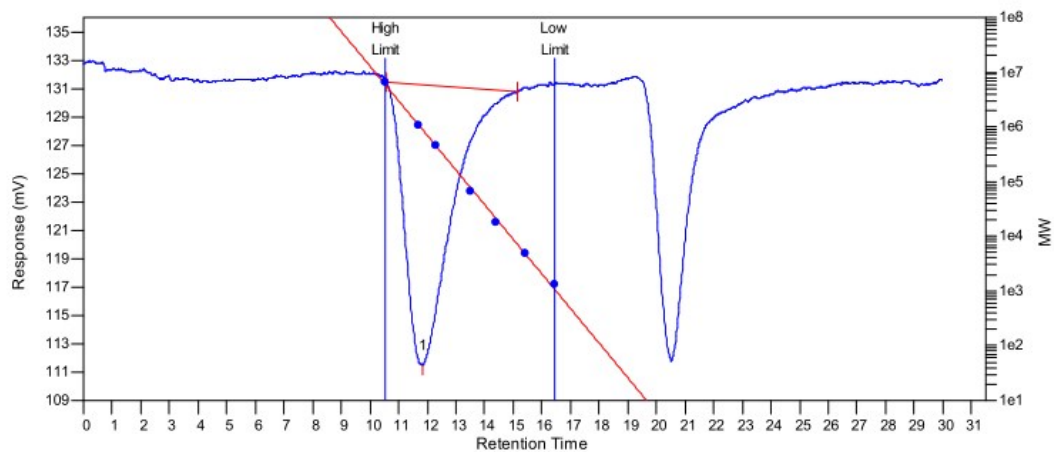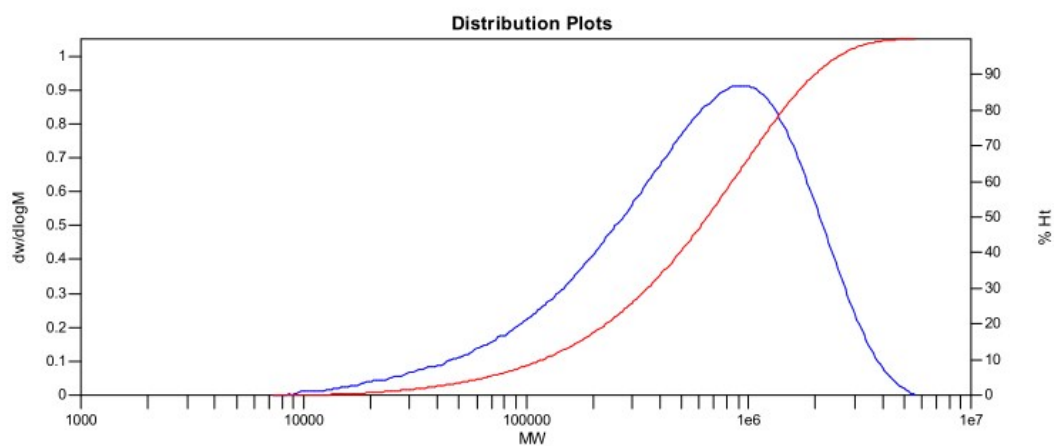

**MW Averages**

| Peak No | Mp     | Mn     | Mw     | Mz      | Mz+1    | Mv     | PD      |
|---------|--------|--------|--------|---------|---------|--------|---------|
| 1       | 867846 | 252027 | 872311 | 1583419 | 2207444 | 775719 | 3.46118 |

**Processed Peaks**

| Peak No | Name | Start RT (mins) | Max RT (mins) | End RT (mins) | Pk Height (mV) | % Height | Area (mV.secs) | % Area |
|---------|------|-----------------|---------------|---------------|----------------|----------|----------------|--------|
| 1       |      | 10.57           | 11.85         | 15.13         | -19.7679       | 100      | 2054.53        | 100    |

**Figure S51.** GPC of the polymer from table 1, entry 3.

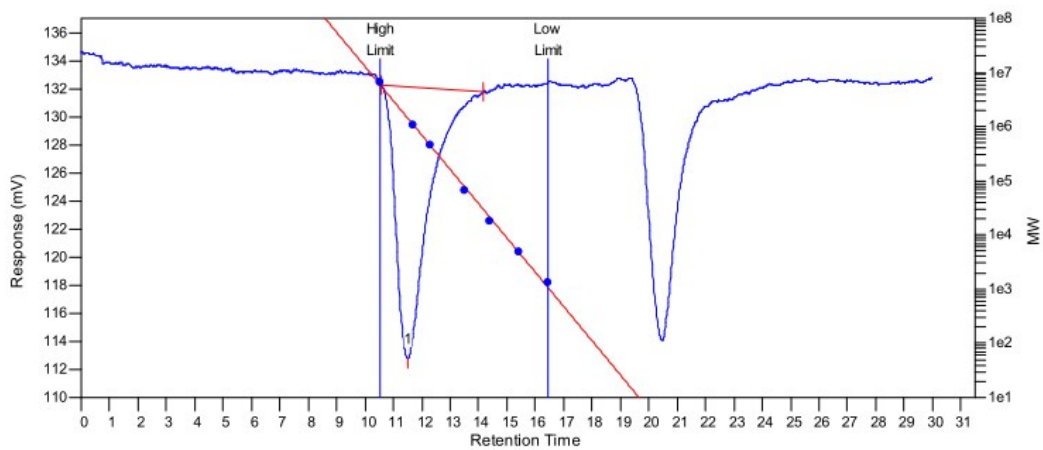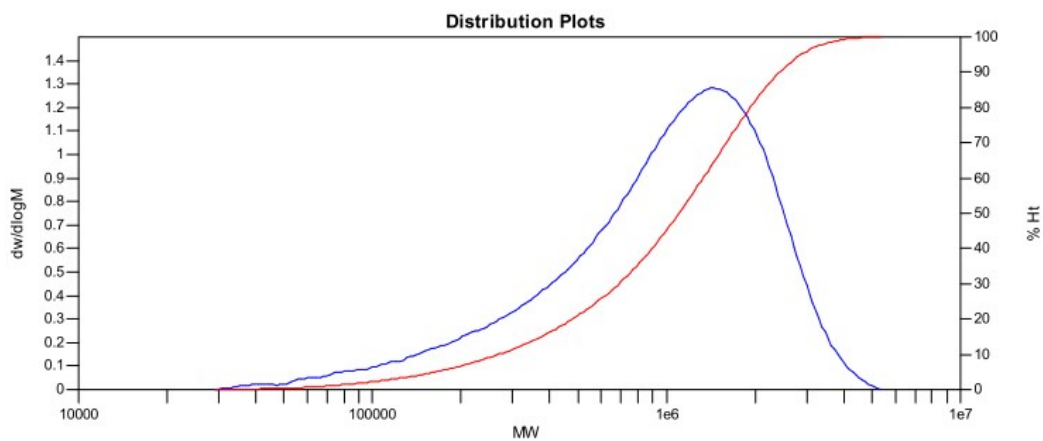

**MW Averages**

| Peak No | Mp      | Mn     | Mw      | Mz      | Mz+1    | Mv      | PD      |
|---------|---------|--------|---------|---------|---------|---------|---------|
| 1       | 1444794 | 562564 | 1235303 | 1808934 | 2267738 | 1147147 | 2.19584 |

**Processed Peaks**

| Peak No | Name | Start RT (mins) | Max RT (mins) | End RT (mins) | Pk Height (mV) | % Height | Area (mV.secs) | % Area |
|---------|------|-----------------|---------------|---------------|----------------|----------|----------------|--------|
| 1       |      | 10.60           | 11.50         | 14.18         | -19.3749       | 100      | 1430.48        | 100    |

Figure S52. GPC of the polymer from table 1, entry 4.



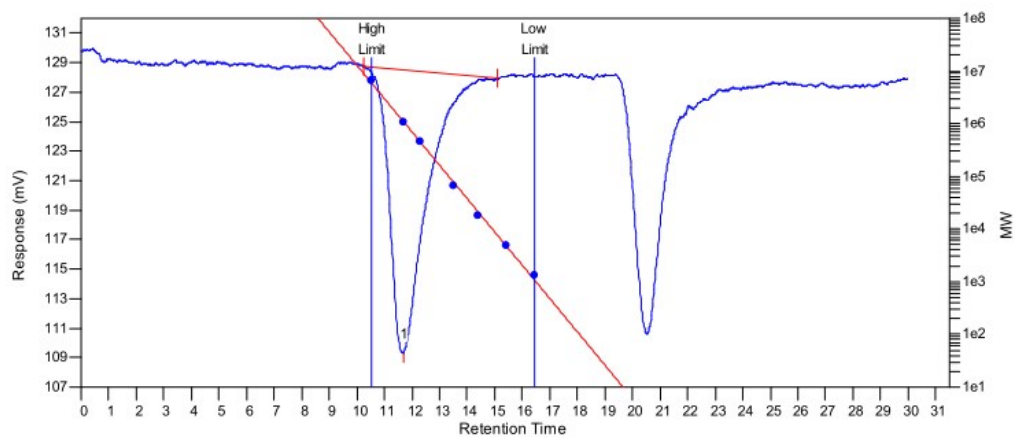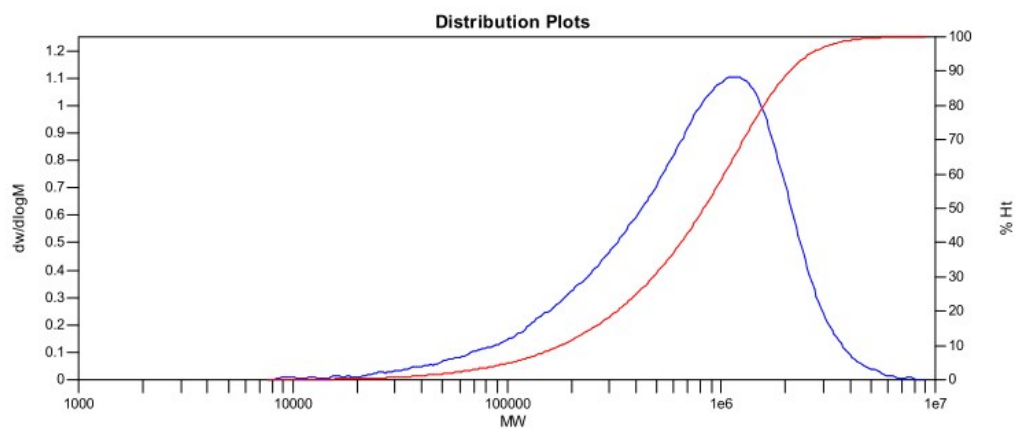

**MW Averages**

| Peak No | Mp      | Mn     | Mw      | Mz      | Mz+1    | Mv     | PD      |
|---------|---------|--------|---------|---------|---------|--------|---------|
| 1       | 1106251 | 353522 | 1011120 | 1700566 | 2435853 | 917737 | 2.86013 |

**Processed Peaks**

| Peak No | Name | Start RT (mins) | Max RT (mins) | End RT (mins) | Pk Height (mV) | % Height | Area (mV.secs) | % Area |
|---------|------|-----------------|---------------|---------------|----------------|----------|----------------|--------|
| 1       |      | 10.25           | 11.68         | 15.10         | -19.1587       | 100      | 1646.43        | 100    |

**Figure S53.** GPC of the polymer from table 1, entry 5.

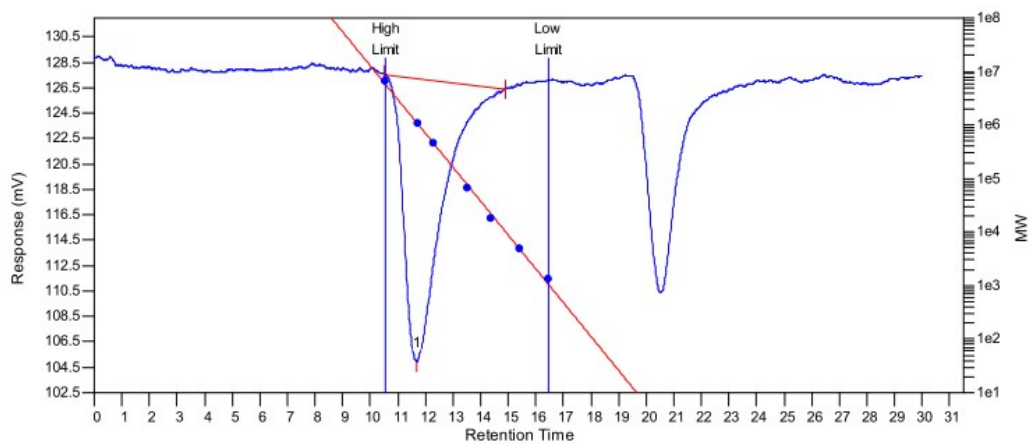

Distribution Plots

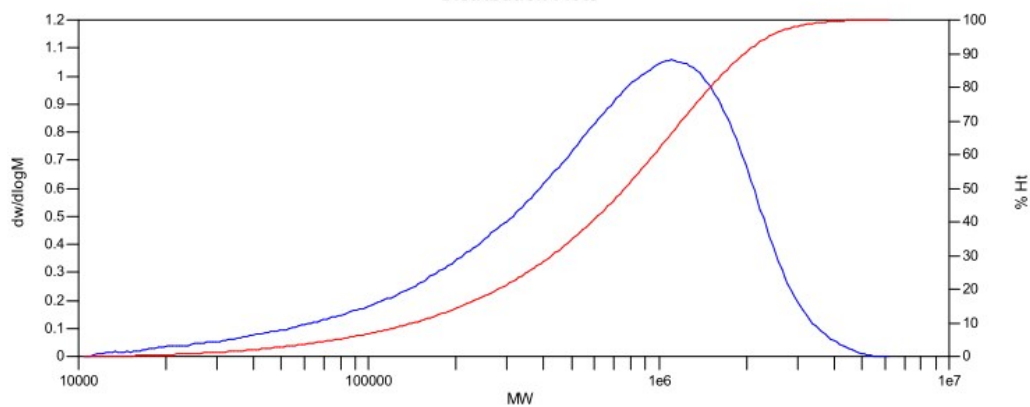

**MW Averages**

| Peak No | Mp      | Mn     | Mw     | Mz      | Mz+1    | Mv     | PD      |
|---------|---------|--------|--------|---------|---------|--------|---------|
| 1       | 1106251 | 295480 | 926645 | 1530575 | 2046498 | 838733 | 3.13607 |

**Processed Peaks**

| Peak No | Name | Start RT (mins) | Max RT (mins) | End RT (mins) | Pk Height (mV) | % Height | Area (mV.secs) | % Area |
|---------|------|-----------------|---------------|---------------|----------------|----------|----------------|--------|
| 1       |      | 10.50           | 11.68         | 14.88         | -22.3331       | 100      | 2004.76        | 100    |

Figure S54. GPC of the polymer from table 1, entry 6.

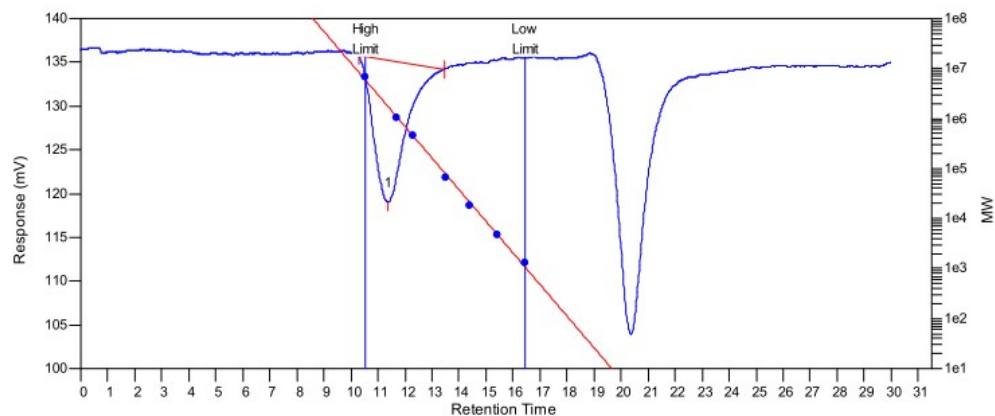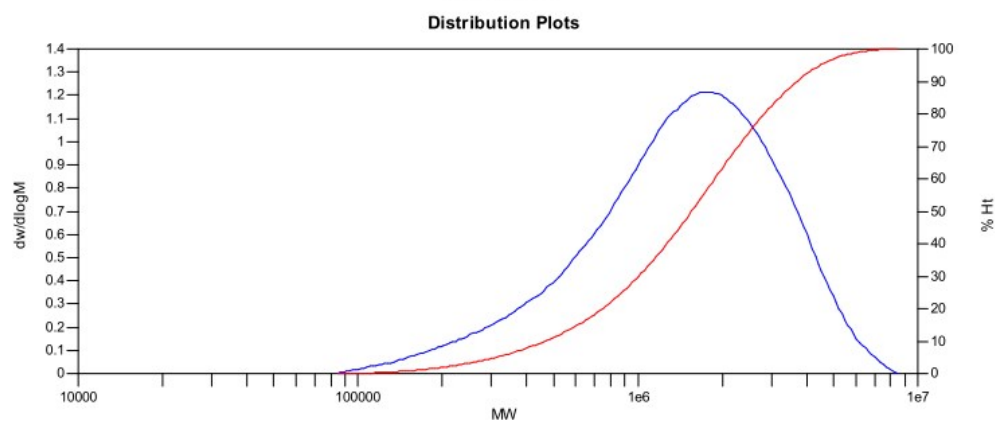

**MW Averages**

| Peak No | Mp      | Mn     | Mw      | Mz      | Mz+1    | Mv      | PD      |
|---------|---------|--------|---------|---------|---------|---------|---------|
| 1       | 1754425 | 967228 | 1838779 | 2757726 | 3592573 | 1708674 | 1.90108 |

**Processed Peaks**

| Peak No | Name | Start RT (mins) | Max RT (mins) | End RT (mins) | Pk Height (mV) | % Height | Area (mV.secs) | % Area |
|---------|------|-----------------|---------------|---------------|----------------|----------|----------------|--------|
| 1       |      | 10.28           | 11.37         | 13.45         | -16.2391       | 100      | 1268.76        | 100    |

Figure S55. GPC of the polymer from table 1, entry 7.

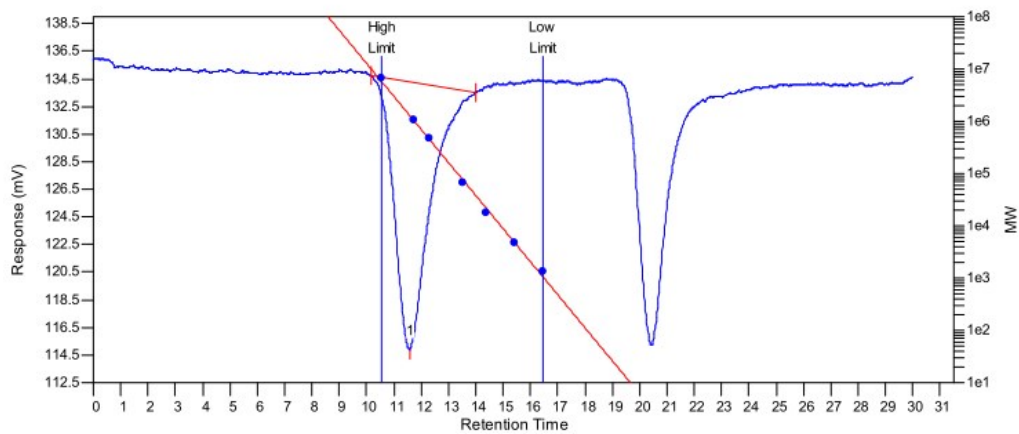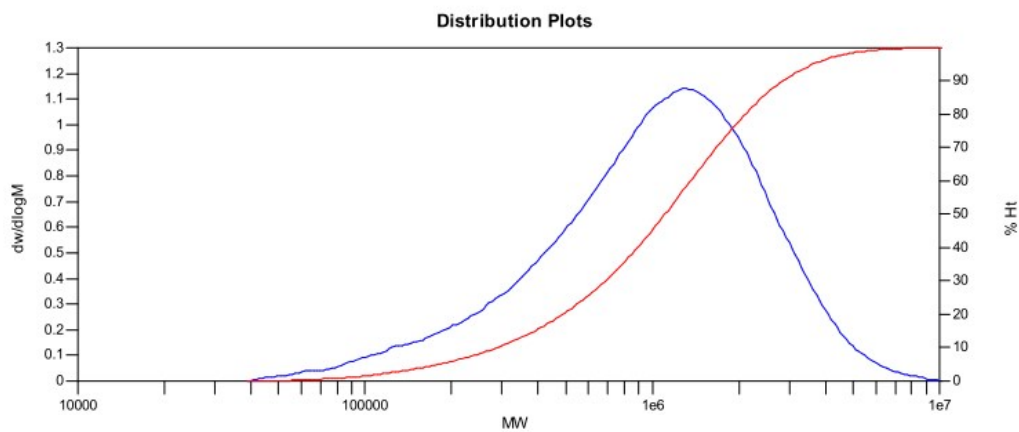

**MW Averages**

| Peak No | Mp      | Mn     | Mw      | Mz      | Mz+1    | Mv      | PD      |
|---------|---------|--------|---------|---------|---------|---------|---------|
| 1       | 1279677 | 609753 | 1376117 | 2298519 | 3310364 | 1256271 | 2.25684 |

**Processed Peaks**

| Peak No | Name | Start RT (mins) | Max RT (mins) | End RT (mins) | Pk Height (mV) | % Height | Area (mV.secs) | % Area |
|---------|------|-----------------|---------------|---------------|----------------|----------|----------------|--------|
| 1       |      | 10.15           | 11.58         | 13.98         | -19.4339       | 100      | 1613.34        | 100    |

Figure S56. GPC of the polymer from table 1, entry 8.

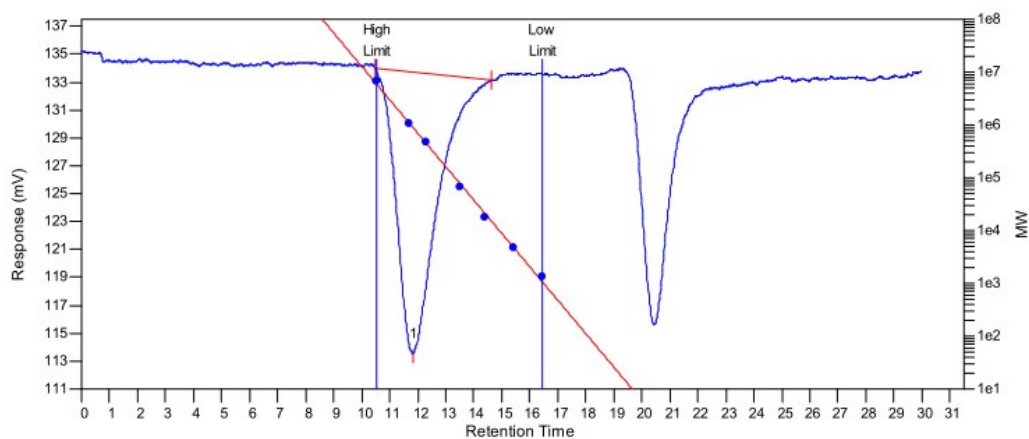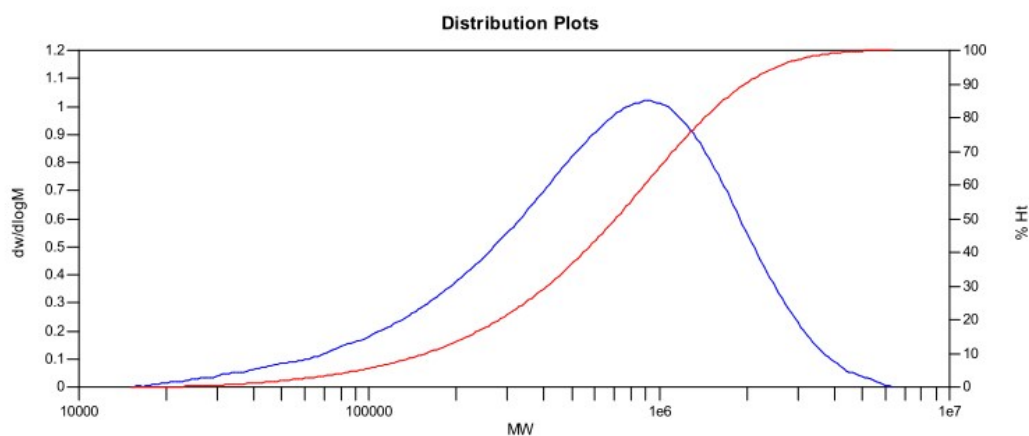

**MW Averages**

| Peak No | Mp     | Mn     | Mw     | Mz      | Mz+1    | Mv     | PD      |
|---------|--------|--------|--------|---------|---------|--------|---------|
| 1       | 889168 | 333770 | 913432 | 1609440 | 2315114 | 822425 | 2.73671 |

**Processed Peaks**

| Peak No | Name | Start RT (mins) | Max RT (mins) | End RT (mins) | Pk Height (mV) | % Height | Area (mV.secs) | % Area |
|---------|------|-----------------|---------------|---------------|----------------|----------|----------------|--------|
| 1       |      | 10.48           | 11.83         | 14.63         | -20.1457       | 100      | 1872.33        | 100    |

Figure S57. GPC of the polymer from table 1, entry 9.

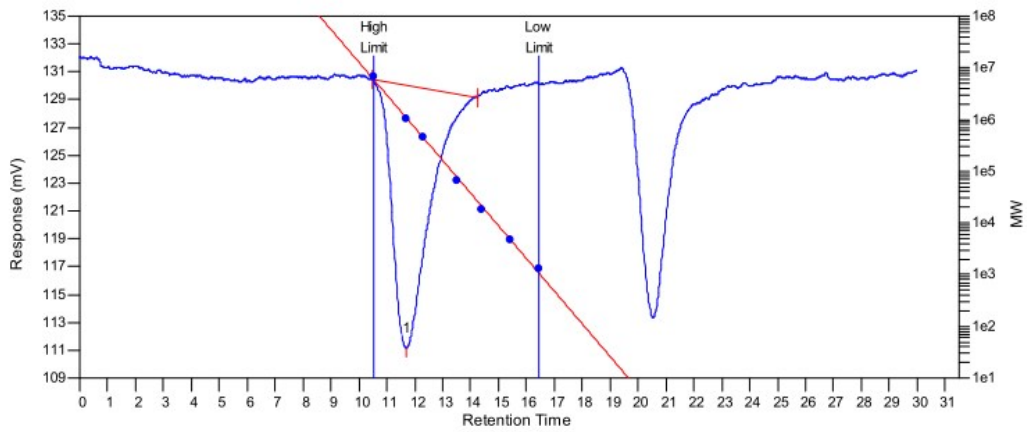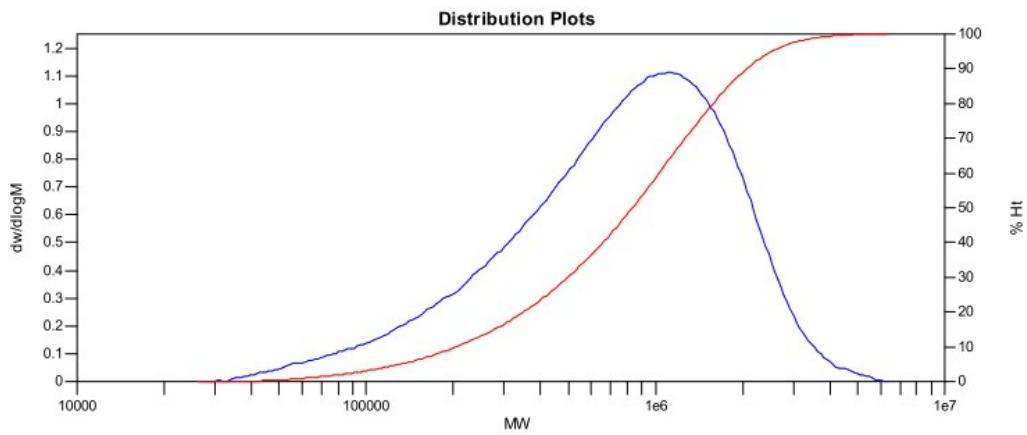

**MW Averages**

| Peak No | Mp      | Mn     | Mw      | Mz      | Mz+1    | Mv     | PD      |
|---------|---------|--------|---------|---------|---------|--------|---------|
| 1       | 1106251 | 446815 | 1003970 | 1606117 | 2180820 | 920180 | 2.24695 |

**Processed Peaks**

| Peak No | Name | Start RT (mins) | Max RT (mins) | End RT (mins) | Pk Height (mV) | % Height | Area (mV.secs) | % Area |
|---------|------|-----------------|---------------|---------------|----------------|----------|----------------|--------|
| 1       |      | 10.48           | 11.68         | 14.25         | -18.9043       | 100      | 1612.56        | 100    |

Figure S58. GPC of the polymer from table 1, entry 10.

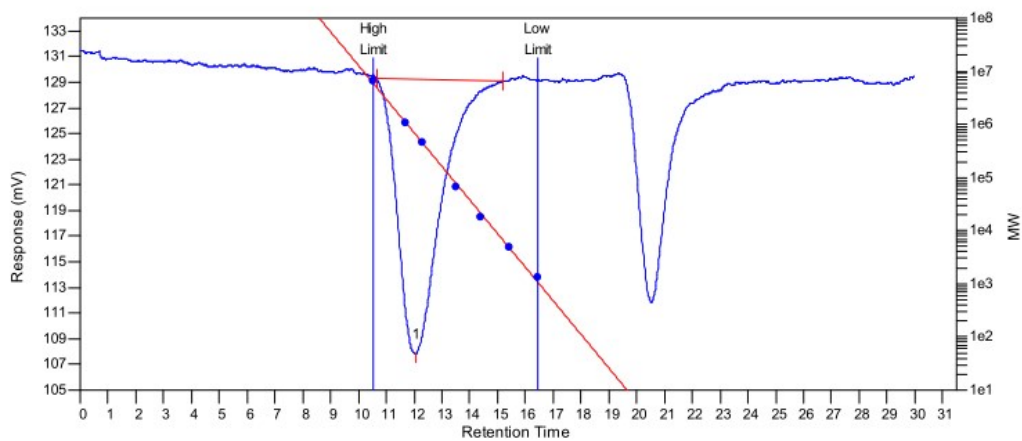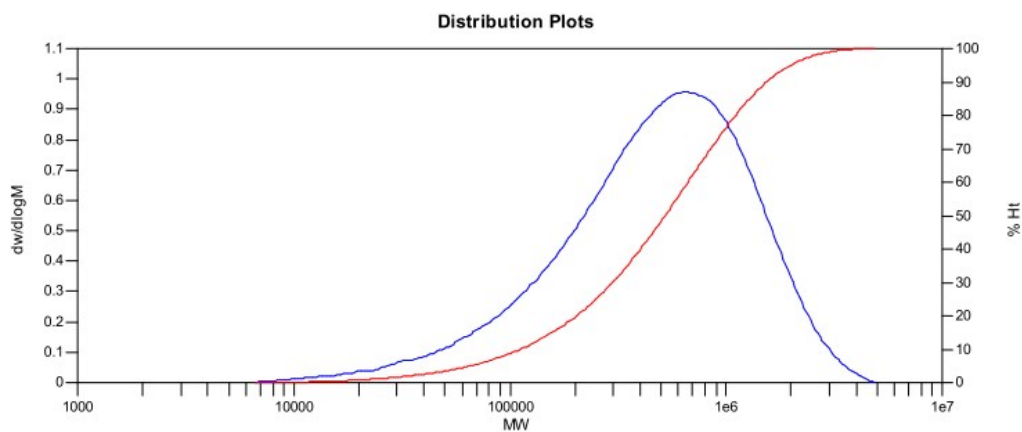

**MW Averages**

| Peak No | Mp     | Mn     | Mw     | Mz      | Mz+1    | Mv     | PD      |
|---------|--------|--------|--------|---------|---------|--------|---------|
| 1       | 648559 | 228100 | 696067 | 1259598 | 1813524 | 622716 | 3.05159 |

**Processed Peaks**

| Peak No | Name | Start RT (mins) | Max RT (mins) | End RT (mins) | Pk Height (mV) | % Height | Area (mV.secs) | % Area |
|---------|------|-----------------|---------------|---------------|----------------|----------|----------------|--------|
| 1       |      | 10.67           | 12.05         | 15.20         | -21.3702       | 100      | 2120.78        | 100    |

Figure S59. GPC of the polymer from table 1, entry 12.

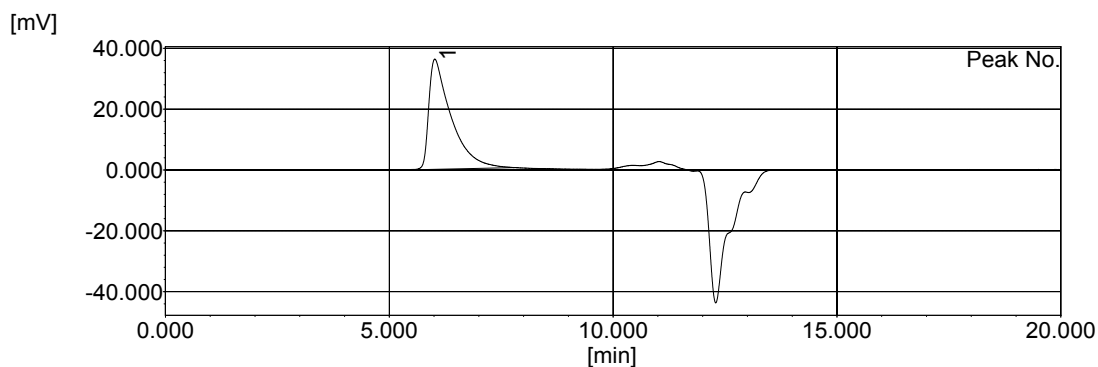

Result of molecular weight calculation (RI)

Peak 1 Base Peak

|               | [min] | [mV]   | [mol]        | Mn      |         |
|---------------|-------|--------|--------------|---------|---------|
| Peak start    | 5.192 | -0.029 |              | Mw      | 422,216 |
|               |       |        | 2,308,111    |         | 534,456 |
| Peak top      | 6.013 | 36.485 | 682,468      | Mz      | 614,371 |
| Peak end      | 7.767 | 0.784  | 50,686       | Mz+1    | 676,840 |
|               |       |        |              | Mv      | 534,456 |
| Height [mV]   |       |        | 36.255       | Mp      | 682,469 |
| Area [mV*sec] |       |        | 1257.610     | Mz/Mw   | 1.150   |
| Area% [%]     |       |        | 100.000      | Mw/Mn   | 1.266   |
| [eta]         |       |        | 534456.28047 | Mz+1/Mw | 1.266   |

Figure S60. GPC of the polymer from table 2, entry 1.

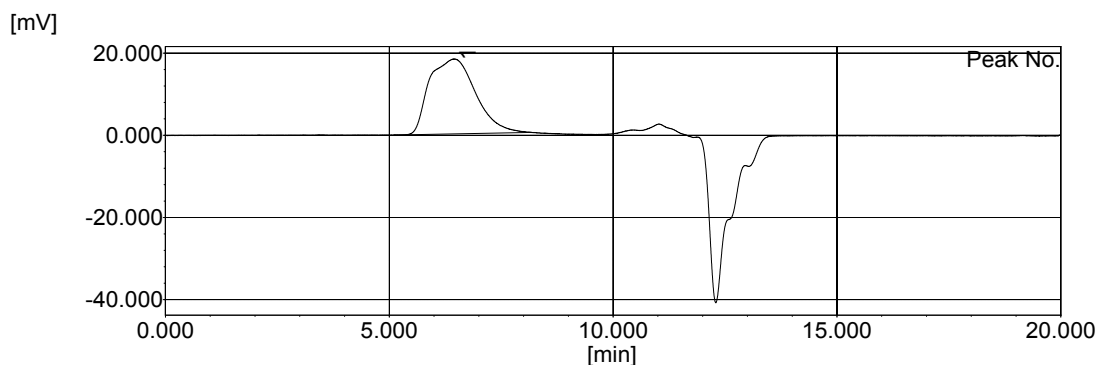

Result of molecular weight calculation (RI)

Peak 1 Base Peak

|               | [min] | [mV]   | [mol]        | Mn      |         |
|---------------|-------|--------|--------------|---------|---------|
| Peak start    | 5.107 | 0.074  | 2,618,176    | Mw      | 279,569 |
| Peak top      | 6.453 | 18.598 | 355,395      | Mz      | 435,731 |
| Peak end      | 8.170 | 0.715  | 27,869       | Mz+1    | 597,551 |
|               |       |        |              | Mv      | 742,609 |
| Height [mV]   |       |        | 18.242       | Mp      | 435,731 |
| Area [mV*sec] |       |        | 1308.353     | Mz/Mw   | 355,395 |
| Area% [%]     |       |        | 100.000      | Mw/Mn   | 1.371   |
| [eta]         |       |        | 435730.55993 | Mz+1/Mw | 1.559   |
|               |       |        |              |         | 1.704   |

Figure S61. GPC of the polymer from table 2, entry 2.



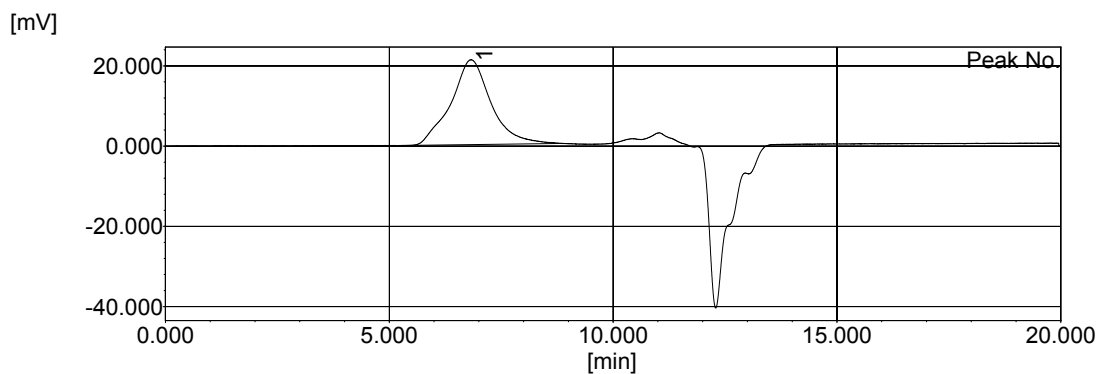

Result of molecular weight calculation (RI)

Peak 1 Base Peak

|               | [min] | [mV]   | [mol]        |         |         |
|---------------|-------|--------|--------------|---------|---------|
| Peak start    | 5.255 | 0.167  | 2,101,205    | Mn      | 147,244 |
| Peak top      | 6.830 | 21.571 | 203,296      | Mw      | 250,548 |
| Peak end      | 8.852 | 0.649  | 10,142       | Mz      | 381,303 |
|               |       |        |              | Mz+1    | 535,619 |
| Height [mV]   |       |        | 21.193       | Mv      | 250,548 |
| Area [mV*sec] |       |        | 1319.175     | Mp      | 203,296 |
| Area% [%]     |       |        | 100.000      | Mz/Mw   | 1.522   |
| [eta]         |       |        | 250548.29829 | Mw/Mn   | 1.702   |
|               |       |        |              | Mz+1/Mw | 2.138   |

Figure S62. GPC of the polymer from table 2, entry 3.

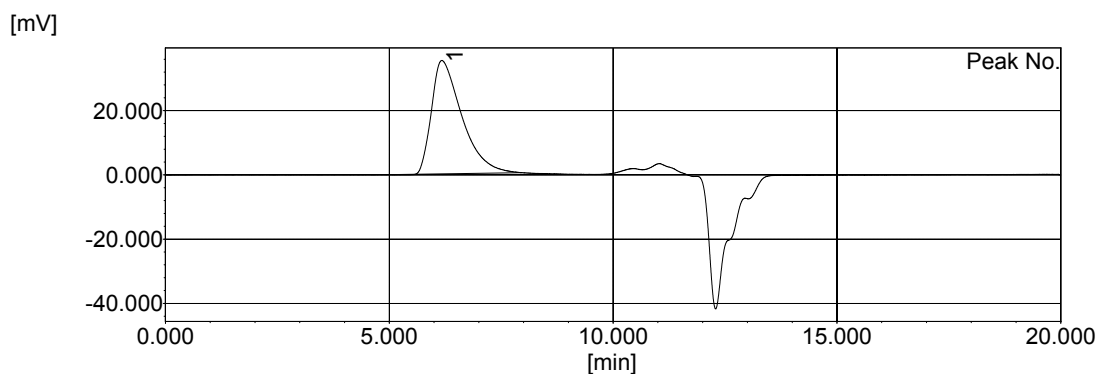

Result of molecular weight calculation (RI)

Peak 1 Base Peak

|               | [min] | [mV]   | [mol]        |         |         |
|---------------|-------|--------|--------------|---------|---------|
| Peak start    | 5.063 | 0.096  | 2,791,943    | Mn      | 342,850 |
| Peak top      | 6.165 | 35.629 | 545,011      | Mw      | 460,531 |
| Peak end      | 7.937 | 0.690  | 39,391       | Mz      | 563,094 |
|               |       |        |              | Mz+1    | 664,795 |
| Height [mV]   |       |        | 35.305       | Mv      | 460,531 |
| Area [mV*sec] |       |        | 1668.594     | Mp      | 545,011 |
| Area% [%]     |       |        | 100.000      | Mz/Mw   | 1.223   |
| [eta]         |       |        | 460531.13084 | Mw/Mn   | 1.343   |
|               |       |        |              | Mz+1/Mw | 1.444   |

Figure S63. GPC of the polymer from table 2, entry 4.

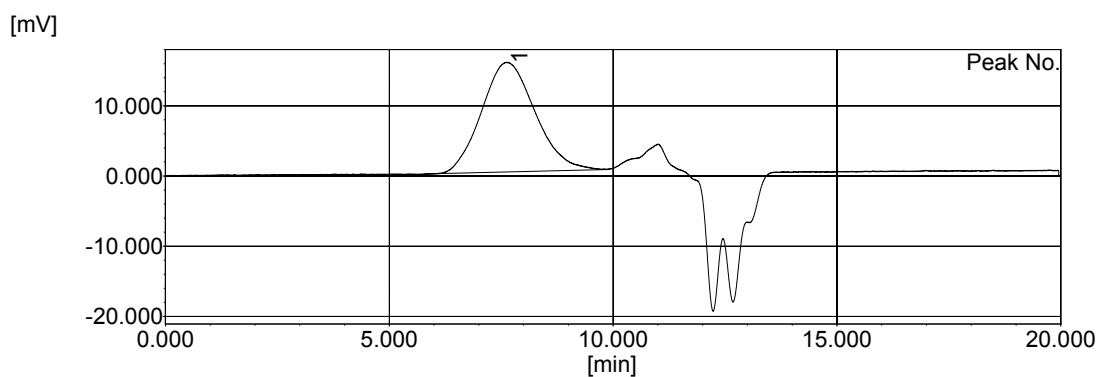

Result of molecular weight calculation (RI)

Peak 1 Base Peak

|               | [min] | [mV]   | [mol]       |         |         |
|---------------|-------|--------|-------------|---------|---------|
| Peak start    | 5.828 | 0.300  | 923,849     | Mn      | 39,198  |
| Peak top      | 7.613 | 16.226 | 65,128      | Mw      | 79,595  |
| Peak end      | 9.827 | 0.915  | 2,429       | Mz      | 138,323 |
|               |       |        |             | Mz+1    | 212,290 |
| Height [mV]   |       |        | 15.651      | Mv      | 79,595  |
| Area [mV*sec] |       |        | 1301.582    | Mp      | 65,128  |
| Area% [%]     |       |        | 100.000     | Mz/Mw   | 1.738   |
| [eta]         |       |        | 79595.15437 | Mw/Mn   | 2.031   |
|               |       |        |             | Mz+1/Mw | 2.667   |

Figure S64. GPC of the polymer from table 3, entry 1.

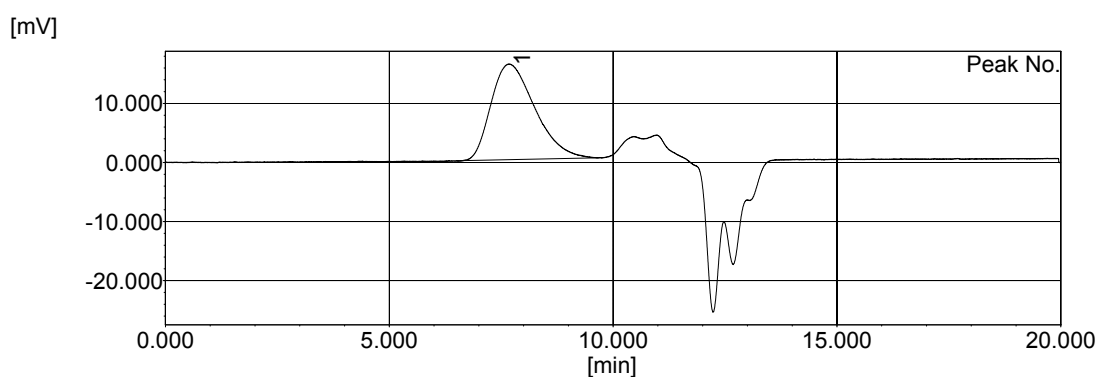

Result of molecular weight calculation (RI)

Peak 1 Base Peak

|               | [min] | [mV]   | [mol]       |         |         |
|---------------|-------|--------|-------------|---------|---------|
| Peak start    | 6.505 | 0.299  | 338,033     | Mn      | 35,877  |
| Peak top      | 7.668 | 16.710 | 60,017      | Mw      | 58,136  |
| Peak end      | 9.637 | 0.786  | 3,222       | Mz      | 81,311  |
|               |       |        |             | Mz+1    | 103,611 |
| Height [mV]   |       |        | 16.230      | Mv      | 58,136  |
| Area [mV*sec] |       |        | 1103.632    | Mp      | 60,018  |
| Area% [%]     |       |        | 100.000     | Mz/Mw   | 1.399   |
| [eta]         |       |        | 58135.53859 | Mw/Mn   | 1.620   |
|               |       |        |             | Mz+1/Mw | 1.782   |

Figure S65. GPC of the polymer from table 3, entry 3.

## 4. References

- (1) Dai, S.; Zhou, S.; Zhang, W.; Chen, C. Systematic Investigations of Ligand Steric Effects on  $\alpha$ -diimine Palladium Catalyzed Olefin Polymerization and Copolymerization. *Macromolecules* **2016**, *49*, 8855-8862.
- (2) Luo, B.; Liu, H.; Lin, Z.; Jiang, J.; Shen, D.; Liu, R.; Ke, Z.; Liu, F. Aerobic and Efficient Direct Arylation of Five-Membered Heteroarenes and Their Benzocondensed Derivatives with Aryl Bromides by Bulky  $\alpha$ -Hydroxyimine Palladium Complexes. *Organometallics* **2015**, *34*, 4881-4894.

## 5. X-ray Crystallography

CCDC number of **Pd1** is 2052788. The data can be obtained free of charge from the Cambridge Crystallographic Data Centre via [www.ccdc.cam.ac.uk/data\\_request/cif](http://www.ccdc.cam.ac.uk/data_request/cif).

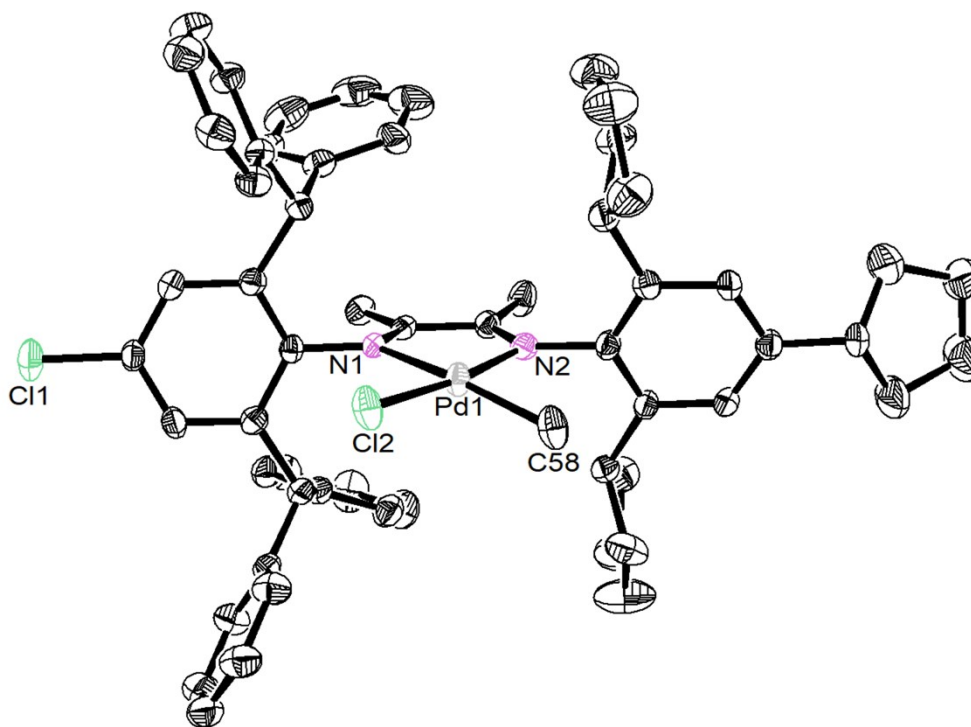

|                                       |                                                                   |
|---------------------------------------|-------------------------------------------------------------------|
| Identification code                   | Pd1                                                               |
| Empirical formula                     | C <sub>58</sub> H <sub>62</sub> Cl <sub>2</sub> N <sub>2</sub> Pd |
| Formula weight                        | 964.40                                                            |
| Temperature/K                         | 298(2) K                                                          |
| Crystal system                        | Monoclinic                                                        |
| Space group                           | P2(1)                                                             |
| a/Å                                   | 11.0865(11)                                                       |
| b/Å                                   | 24.739(2)                                                         |
| c/Å                                   | 18.0106(17)                                                       |
| $\alpha$ /°                           | 90                                                                |
| $\beta$ /°                            | 100.813(2)                                                        |
| $\gamma$ /°                           | 90                                                                |
| Volume/Å <sup>3</sup>                 | 4852.1(8)                                                         |
| Z                                     | 4                                                                 |
| $\rho_{\text{calc}}$ /cm <sup>3</sup> | 1.320                                                             |

|                                                |                                                                    |
|------------------------------------------------|--------------------------------------------------------------------|
| $\mu / \text{mm}^{-1}$                         | 0.533                                                              |
| F(000)                                         | 2016                                                               |
| Crystal size/ $\text{mm}^3$                    | 0.35 x 0.23 x 0.20                                                 |
| Radiation                                      | MoK $\alpha$ ( $\lambda = 0.71073$ )                               |
| $2\Theta$ range for data collection/ $^\circ$  | 2.01 to 25.02                                                      |
| Index ranges                                   | $-13 \leq h \leq 13$ , $-29 \leq k \leq 24$ , $-21 \leq l \leq 20$ |
| Reflections collected                          | 24137                                                              |
| Independent reflections                        | 8558 [R(int) = 0.0638]                                             |
| Data/restraints/parameters                     | 8558 / 185 / 571                                                   |
| Goodness-of-fit on $F^2$                       | 1.109                                                              |
| Final R indexes [ $I \geq 2\sigma(I)$ ]        | R1 = 0.0749, wR2 = 0.2027                                          |
| Final R indexes [all data]                     | R1 = 0.1101, wR2 = 0.2311                                          |
| Largest diff. peak/hole / $e \text{ \AA}^{-3}$ | 0.687 and -1.798                                                   |
